# Supplementary material for: Identification of Functional Gene Modules Associated With STAT-Mediated Antiviral Responses to White Spot Syndrome Virus in Shrimp
Source: Front Physiol. 2019 Mar 11;10:212. doi: 10.3389/fphys.2019.00212 (PMC6421301; doi:10.3389/fphys.2019.00212)
Supplement: FILE S2 — Candidate modules specially affected by STAT during WSSV infection. [file Data_Sheet_2.ZIP]

Archive with 382 entries (381 files):
- CMASWs/
- CMASWs/2.txt
- CMASWs/8.txt
- CMASWs/13.txt
- CMASWs/17.txt
- CMASWs/18.txt
- CMASWs/23.txt
- CMASWs/25.txt
- CMASWs/28.txt
- CMASWs/33.txt
- CMASWs/43.txt
- CMASWs/51.txt
- CMASWs/53.txt
- CMASWs/54.txt
- CMASWs/58.txt
- CMASWs/63.txt
- CMASWs/66.txt
- CMASWs/73.txt
- CMASWs/74.txt
- CMASWs/75.txt
- CMASWs/80.txt
- CMASWs/86.txt
- CMASWs/89.txt
- CMASWs/93.txt
- CMASWs/94.txt
- CMASWs/97.txt
- CMASWs/98.txt
- CMASWs/111.txt
- CMASWs/137.txt
- CMASWs/140.txt
- CMASWs/154.txt
- CMASWs/155.txt
- CMASWs/157.txt
- CMASWs/159.txt
- CMASWs/161.txt
- CMASWs/162.txt
- CMASWs/170.txt
- CMASWs/189.txt
- CMASWs/190.txt
- CMASWs/192.txt
- CMASWs/193.txt
- CMASWs/194.txt
- CMASWs/199.txt
- CMASWs/203.txt
- CMASWs/208.txt
- CMASWs/211.txt
- CMASWs/213.txt
- CMASWs/214.txt
- CMASWs/215.txt
- CMASWs/216.txt
- CMASWs/224.txt
- CMASWs/230.txt
- CMASWs/231.txt
- CMASWs/233.txt
- CMASWs/250.txt
- CMASWs/253.txt
- CMASWs/261.txt
- CMASWs/263.txt
- CMASWs/295.txt
- CMASWs/304.txt
- CMASWs/310.txt
- CMASWs/312.txt
- CMASWs/314.txt
- CMASWs/317.txt
- CMASWs/319.txt
- CMASWs/332.txt
- CMASWs/340.txt
- CMASWs/345.txt
- CMASWs/358.txt
- CMASWs/360.txt
- CMASWs/366.txt
- CMASWs/373.txt
- CMASWs/375.txt
- CMASWs/377.txt
- CMASWs/383.txt
- CMASWs/392.txt
- CMASWs/394.txt
- CMASWs/399.txt
- CMASWs/400.txt
- CMASWs/406.txt
- CMASWs/410.txt
- CMASWs/413.txt
- CMASWs/418.txt
- CMASWs/420.txt
- CMASWs/425.txt
- CMASWs/428.txt
- CMASWs/429.txt
- CMASWs/430.txt
- CMASWs/432.txt
- CMASWs/433.txt
- CMASWs/434.txt
- CMASWs/436.txt
- CMASWs/449.txt
- CMASWs/453.txt
- CMASWs/455.txt
- CMASWs/459.txt
- CMASWs/479.txt
- CMASWs/482.txt
- CMASWs/499.txt
- CMASWs/515.txt
- CMASWs/516.txt
- CMASWs/518.txt
- CMASWs/519.txt
- CMASWs/526.txt
- CMASWs/541.txt
- CMASWs/554.txt
- CMASWs/558.txt
- CMASWs/564.txt
- CMASWs/570.txt
- CMASWs/572.txt
- CMASWs/574.txt
- CMASWs/575.txt
- CMASWs/577.txt
- CMASWs/580.txt
- CMASWs/581.txt
- CMASWs/582.txt
- CMASWs/599.txt
- CMASWs/600.txt
- CMASWs/605.txt
- CMASWs/616.txt
- CMASWs/619.txt
- CMASWs/623.txt
- CMASWs/638.txt
- CMASWs/648.txt
- CMASWs/659.txt
- CMASWs/679.txt
- CMASWs/695.txt
- CMASWs/704.txt
- CMASWs/705.txt
- CMASWs/708.txt
- CMASWs/711.txt
- CMASWs/716.txt
- CMASWs/718.txt
- CMASWs/723.txt
- CMASWs/729.txt
- CMASWs/742.txt
- CMASWs/751.txt
- CMASWs/759.txt
- CMASWs/760.txt
- CMASWs/763.txt
- CMASWs/764.txt
- CMASWs/769.txt
- CMASWs/773.txt
- CMASWs/777.txt
- CMASWs/784.txt
- CMASWs/791.txt
- CMASWs/804.txt
- CMASWs/805.txt
- CMASWs/809.txt
- CMASWs/811.txt
- CMASWs/816.txt
- CMASWs/825.txt
- CMASWs/833.txt
- CMASWs/840.txt
- CMASWs/844.txt
- CMASWs/849.txt
- CMASWs/850.txt
- CMASWs/854.txt
- CMASWs/860.txt
- CMASWs/862.txt
- CMASWs/864.txt
- CMASWs/866.txt
- CMASWs/871.txt
- CMASWs/872.txt
- CMASWs/876.txt
- CMASWs/880.txt
- CMASWs/894.txt
- CMASWs/896.txt
- CMASWs/898.txt
- CMASWs/917.txt
- CMASWs/919.txt
- CMASWs/921.txt
- CMASWs/925.txt
- CMASWs/926.txt
- CMASWs/928.txt
- CMASWs/931.txt
- CMASWs/944.txt
- CMASWs/948.txt
- CMASWs/949.txt
- CMASWs/954.txt
- CMASWs/955.txt
- CMASWs/973.txt
- CMASWs/975.txt
- CMASWs/980.txt
- CMASWs/983.txt
- CMASWs/993.txt
- CMASWs/995.txt
- CMASWs/996.txt
- CMASWs/999.txt
- CMASWs/1002.txt
- CMASWs/1008.txt
- CMASWs/1011.txt
- CMASWs/1032.txt
- CMASWs/1033.txt
- CMASWs/1037.txt
- CMASWs/1039.txt
- CMASWs/1042.txt
- CMASWs/1044.txt
- CMASWs/1048.txt
- CMASWs/1052.txt
- CMASWs/1054.txt
- CMASWs/1060.txt
- CMASWs/1065.txt
- CMASWs/1067.txt
- CMASWs/1070.txt
- CMASWs/1080.txt
- CMASWs/1082.txt
- CMASWs/1089.txt
- CMASWs/1096.txt
- CMASWs/1102.txt
- CMASWs/1110.txt
- CMASWs/1119.txt
- CMASWs/1122.txt
- CMASWs/1124.txt
- CMASWs/1125.txt
- CMASWs/1134.txt
- CMASWs/1140.txt
- CMASWs/1145.txt
- CMASWs/1147.txt
- CMASWs/1153.txt
- CMASWs/1159.txt
- CMASWs/1164.txt
- CMASWs/1187.txt
- CMASWs/1189.txt
- CMASWs/1191.txt
- CMASWs/1195.txt
- CMASWs/1198.txt
- CMASWs/1206.txt
- CMASWs/1209.txt
- CMASWs/1212.txt
- CMASWs/1213.txt
- CMASWs/1214.txt
- CMASWs/1216.txt
- CMASWs/1225.txt
- CMASWs/1228.txt
- CMASWs/1229.txt
- CMASWs/1232.txt
- CMASWs/1233.txt
- CMASWs/1237.txt
- CMASWs/1244.txt
- CMASWs/1246.txt
- CMASWs/1252.txt
- CMASWs/1253.txt
- CMASWs/1255.txt
- CMASWs/1256.txt
- CMASWs/1258.txt
- CMASWs/1260.txt
- CMASWs/1265.txt
- CMASWs/1273.txt
- CMASWs/1275.txt
- CMASWs/1280.txt
- CMASWs/1285.txt
- CMASWs/1288.txt
- CMASWs/1292.txt
- CMASWs/1296.txt
- CMASWs/1300.txt
- CMASWs/1306.txt
- CMASWs/1312.txt
- CMASWs/1315.txt
- CMASWs/1326.txt
- CMASWs/1328.txt
- CMASWs/1329.txt
- CMASWs/1338.txt
- CMASWs/1346.txt
- CMASWs/1349.txt
- CMASWs/1362.txt
- CMASWs/1372.txt
- CMASWs/1378.txt
- CMASWs/1382.txt
- CMASWs/1395.txt
- CMASWs/1396.txt
- CMASWs/1399.txt
- CMASWs/1410.txt
- CMASWs/1413.txt
- CMASWs/1414.txt
- CMASWs/1415.txt
- CMASWs/1421.txt
- CMASWs/1426.txt
- CMASWs/1433.txt
- CMASWs/1438.txt
- CMASWs/1445.txt
- CMASWs/1448.txt
- CMASWs/1450.txt
- CMASWs/1451.txt
- CMASWs/1457.txt
- CMASWs/1459.txt
- CMASWs/1460.txt
- CMASWs/1465.txt
- CMASWs/1468.txt
- CMASWs/1471.txt
- CMASWs/1475.txt
- CMASWs/1480.txt
- CMASWs/1481.txt
- CMASWs/1482.txt
- CMASWs/1486.txt
- CMASWs/1492.txt
- CMASWs/1504.txt
- CMASWs/1508.txt
- CMASWs/1513.txt
- CMASWs/1517.txt
[truncated: 82 more entries]
