# Supplementary material for: Identification of Functional Gene Modules Associated With STAT-Mediated Antiviral Responses to White Spot Syndrome Virus in Shrimp
Source: Front Physiol. 2019 Mar 11;10:212. doi: 10.3389/fphys.2019.00212 (PMC6421301; doi:10.3389/fphys.2019.00212)
Supplement: FILE S2 — Candidate modules specially affected by STAT during WSSV infection. [file Data_Sheet_2.ZIP › CMASWs/13.txt]

CL1190.Contig19_All
CL1290.Contig2_All
CL1487.Contig2_All
CL1538.Contig1_All
CL17.Contig5_All
CL2449.Contig6_All
CL2895.Contig1_All
CL3508.Contig2_All
CL4716.Contig3_All
CL5786.Contig3_All
CL6072.Contig1_All
CL733.Contig11_All
CL916.Contig1_All
CL945.Contig3_All
Unigene10726_All
Unigene1411_All
Unigene1500_All
Unigene18523_All
Unigene18993_All
Unigene18994_All
Unigene18995_All
Unigene20540_All
Unigene21704_All
Unigene22650_All
Unigene2270_All
Unigene24588_All
Unigene25816_All
Unigene26202_All
Unigene30814_All
Unigene31432_All
Unigene3207_All
Unigene32527_All
Unigene32589_All
Unigene37339_All
Unigene37826_All
Unigene42848_All
Unigene45327_All
Unigene49057_All
Unigene5284_All
Unigene5385_All
Unigene6126_All
Unigene6663_All
