# Supplementary material for: Identification of Functional Gene Modules Associated With STAT-Mediated Antiviral Responses to White Spot Syndrome Virus in Shrimp
Source: Front Physiol. 2019 Mar 11;10:212. doi: 10.3389/fphys.2019.00212 (PMC6421301; doi:10.3389/fphys.2019.00212)
Supplement: FILE S2 — Candidate modules specially affected by STAT during WSSV infection. [file Data_Sheet_2.ZIP › CMASWs/23.txt]

CL1190.Contig19_All
CL1338.Contig9_All
CL1475.Contig1_All
CL1863.Contig1_All
CL2052.Contig2_All
CL3508.Contig2_All
CL389.Contig12_All
CL413.Contig7_All
CL4881.Contig2_All
CL5519.Contig1_All
CL5895.Contig2_All
CL5916.Contig2_All
CL644.Contig3_All
Unigene13984_All
Unigene18373_All
Unigene18727_All
Unigene19520_All
Unigene20393_All
Unigene22150_All
Unigene25692_All
Unigene29332_All
Unigene3032_All
Unigene33266_All
Unigene33300_All
Unigene38154_All
Unigene3952_All
Unigene43784_All
