# Supplementary material for: Identification of Functional Gene Modules Associated With STAT-Mediated Antiviral Responses to White Spot Syndrome Virus in Shrimp
Source: Front Physiol. 2019 Mar 11;10:212. doi: 10.3389/fphys.2019.00212 (PMC6421301; doi:10.3389/fphys.2019.00212)
Supplement: FILE S2 — Candidate modules specially affected by STAT during WSSV infection. [file Data_Sheet_2.ZIP › CMASWs/25.txt]

CL1240.Contig2_All
CL1584.Contig13_All
CL3565.Contig6_All
CL4784.Contig2_All
CL6072.Contig1_All
CL732.Contig3_All
CL897.Contig1_All
CL916.Contig1_All
Unigene15028_All
Unigene16895_All
Unigene19491_All
Unigene2270_All
Unigene24810_All
Unigene29413_All
Unigene31011_All
Unigene31068_All
Unigene32589_All
Unigene32662_All
Unigene36350_All
Unigene4679_All
Unigene47396_All
Unigene48782_All
Unigene5520_All
Unigene9911_All
