# Supplementary material for: Identification of Functional Gene Modules Associated With STAT-Mediated Antiviral Responses to White Spot Syndrome Virus in Shrimp
Source: Front Physiol. 2019 Mar 11;10:212. doi: 10.3389/fphys.2019.00212 (PMC6421301; doi:10.3389/fphys.2019.00212)
Supplement: FILE S2 — Candidate modules specially affected by STAT during WSSV infection. [file Data_Sheet_2.ZIP › CMASWs/28.txt]

CL1240.Contig2_All
CL1569.Contig3_All
CL3456.Contig1_All
CL3565.Contig6_All
CL4537.Contig1_All
CL470.Contig2_All
Unigene15028_All
Unigene15719_All
Unigene16652_All
Unigene16895_All
Unigene17696_All
Unigene22169_All
Unigene24810_All
Unigene2483_All
Unigene26034_All
Unigene29413_All
Unigene30638_All
Unigene31068_All
Unigene38430_All
Unigene47396_All
Unigene48782_All
Unigene9253_All
