# Supplementary material for: Identification of Functional Gene Modules Associated With STAT-Mediated Antiviral Responses to White Spot Syndrome Virus in Shrimp
Source: Front Physiol. 2019 Mar 11;10:212. doi: 10.3389/fphys.2019.00212 (PMC6421301; doi:10.3389/fphys.2019.00212)
Supplement: FILE S2 — Candidate modules specially affected by STAT during WSSV infection. [file Data_Sheet_2.ZIP › CMASWs/33.txt]

CL1269.Contig3_All
CL1627.Contig1_All
CL2069.Contig1_All
CL277.Contig3_All
CL2930.Contig2_All
CL2990.Contig1_All
CL3266.Contig2_All
CL3606.Contig1_All
CL4668.Contig2_All
CL5626.Contig1_All
CL5775.Contig1_All
Unigene13740_All
Unigene14058_All
Unigene14242_All
Unigene14552_All
Unigene15118_All
Unigene16749_All
Unigene18697_All
Unigene2531_All
Unigene36578_All
Unigene3812_All
Unigene39424_All
Unigene39637_All
Unigene40138_All
Unigene42133_All
Unigene45749_All
Unigene47504_All
Unigene48329_All
Unigene48431_All
Unigene49262_All
Unigene49728_All
Unigene513_All
