# Supplementary material for: Identification of Functional Gene Modules Associated With STAT-Mediated Antiviral Responses to White Spot Syndrome Virus in Shrimp
Source: Front Physiol. 2019 Mar 11;10:212. doi: 10.3389/fphys.2019.00212 (PMC6421301; doi:10.3389/fphys.2019.00212)
Supplement: FILE S2 — Candidate modules specially affected by STAT during WSSV infection. [file Data_Sheet_2.ZIP › CMASWs/43.txt]

CL1399.Contig2_All
CL1444.Contig3_All
CL1474.Contig2_All
CL1881.Contig1_All
CL224.Contig4_All
CL2578.Contig3_All
CL2738.Contig3_All
CL2934.Contig1_All
CL3091.Contig2_All
CL31.Contig2_All
CL3331.Contig1_All
CL4186.Contig1_All
CL4197.Contig2_All
CL5063.Contig1_All
CL5494.Contig1_All
CL637.Contig2_All
CL732.Contig3_All
CL997.Contig4_All
Unigene10471_All
Unigene11075_All
Unigene11195_All
Unigene14141_All
Unigene14387_All
Unigene14502_All
Unigene17412_All
Unigene18306_All
Unigene18454_All
Unigene18523_All
Unigene21457_All
Unigene22323_All
Unigene25478_All
Unigene28170_All
Unigene33333_All
Unigene35027_All
Unigene35801_All
Unigene41895_All
Unigene42792_All
Unigene43624_All
Unigene44463_All
Unigene45775_All
Unigene46530_All
Unigene47645_All
Unigene48238_All
Unigene7018_All
