# Supplementary material for: Identification of Functional Gene Modules Associated With STAT-Mediated Antiviral Responses to White Spot Syndrome Virus in Shrimp
Source: Front Physiol. 2019 Mar 11;10:212. doi: 10.3389/fphys.2019.00212 (PMC6421301; doi:10.3389/fphys.2019.00212)
Supplement: FILE S2 — Candidate modules specially affected by STAT during WSSV infection. [file Data_Sheet_2.ZIP › CMASWs/51.txt]

CL1556.Contig1_All
CL1723.Contig1_All
CL1834.Contig1_All
CL220.Contig2_All
CL2535.Contig1_All
CL2620.Contig1_All
CL2788.Contig1_All
CL312.Contig1_All
CL3456.Contig1_All
CL3473.Contig2_All
CL3993.Contig1_All
CL4233.Contig3_All
CL4370.Contig1_All
CL5193.Contig1_All
CL5212.Contig1_All
CL5235.Contig1_All
Unigene10051_All
Unigene12531_All
Unigene13680_All
Unigene14766_All
Unigene15969_All
Unigene16872_All
Unigene18455_All
Unigene19837_All
Unigene21948_All
Unigene25203_All
Unigene28307_All
Unigene28358_All
Unigene29297_All
Unigene29774_All
Unigene36292_All
Unigene40670_All
Unigene43235_All
Unigene44580_All
Unigene45064_All
Unigene46025_All
Unigene46161_All
Unigene47641_All
Unigene49421_All
Unigene50152_All
Unigene5090_All
Unigene7008_All
Unigene8756_All
