# Supplementary material for: Identification of Functional Gene Modules Associated With STAT-Mediated Antiviral Responses to White Spot Syndrome Virus in Shrimp
Source: Front Physiol. 2019 Mar 11;10:212. doi: 10.3389/fphys.2019.00212 (PMC6421301; doi:10.3389/fphys.2019.00212)
Supplement: FILE S2 — Candidate modules specially affected by STAT during WSSV infection. [file Data_Sheet_2.ZIP › CMASWs/53.txt]

CL2006.Contig3_All
CL3460.Contig2_All
CL4169.Contig1_All
CL4617.Contig1_All
CL506.Contig3_All
CL5880.Contig1_All
CL991.Contig10_All
Unigene10511_All
Unigene12526_All
Unigene13033_All
Unigene1378_All
Unigene28814_All
Unigene34702_All
Unigene39694_All
Unigene41624_All
Unigene42864_All
Unigene4732_All
Unigene48322_All
Unigene7186_All
Unigene7200_All
Unigene7446_All
Unigene7531_All
