# Supplementary material for: Identification of Functional Gene Modules Associated With STAT-Mediated Antiviral Responses to White Spot Syndrome Virus in Shrimp
Source: Front Physiol. 2019 Mar 11;10:212. doi: 10.3389/fphys.2019.00212 (PMC6421301; doi:10.3389/fphys.2019.00212)
Supplement: FILE S2 — Candidate modules specially affected by STAT during WSSV infection. [file Data_Sheet_2.ZIP › CMASWs/63.txt]

CL1064.Contig2_All
CL113.Contig2_All
CL1646.Contig1_All
CL1788.Contig2_All
CL1859.Contig2_All
CL20.Contig16_All
CL2158.Contig3_All
CL225.Contig2_All
CL2532.Contig5_All
CL2648.Contig1_All
CL2918.Contig3_All
CL3305.Contig2_All
CL3332.Contig2_All
CL3704.Contig1_All
CL398.Contig17_All
CL4002.Contig2_All
CL4093.Contig3_All
CL5101.Contig4_All
CL529.Contig2_All
CL5508.Contig3_All
CL6039.Contig2_All
CL6041.Contig2_All
CL619.Contig4_All
CL758.Contig1_All
Unigene10712_All
Unigene13623_All
Unigene13852_All
Unigene17500_All
Unigene21415_All
Unigene21509_All
Unigene23637_All
Unigene24442_All
Unigene27275_All
Unigene29366_All
Unigene29641_All
Unigene29837_All
Unigene31392_All
Unigene32363_All
Unigene34003_All
Unigene36298_All
Unigene37119_All
Unigene37850_All
Unigene41746_All
Unigene42125_All
Unigene43181_All
Unigene44823_All
Unigene46773_All
Unigene48782_All
Unigene50068_All
Unigene5649_All
Unigene7190_All
