# Supplementary material for: Identification of Functional Gene Modules Associated With STAT-Mediated Antiviral Responses to White Spot Syndrome Virus in Shrimp
Source: Front Physiol. 2019 Mar 11;10:212. doi: 10.3389/fphys.2019.00212 (PMC6421301; doi:10.3389/fphys.2019.00212)
Supplement: FILE S2 — Candidate modules specially affected by STAT during WSSV infection. [file Data_Sheet_2.ZIP › CMASWs/73.txt]

CL1189.Contig5_All
CL1512.Contig3_All
CL1512.Contig6_All
CL1821.Contig2_All
CL2017.Contig1_All
CL2017.Contig2_All
CL2905.Contig2_All
CL3948.Contig1_All
CL4278.Contig1_All
CL5553.Contig1_All
CL6079.Contig1_All
CL856.Contig1_All
CL861.Contig2_All
CL907.Contig1_All
Unigene12877_All
Unigene13860_All
Unigene14879_All
Unigene14902_All
Unigene18282_All
Unigene18685_All
Unigene21633_All
Unigene23650_All
Unigene2568_All
Unigene26557_All
Unigene29326_All
Unigene32891_All
Unigene33348_All
Unigene34002_All
Unigene35863_All
Unigene47612_All
Unigene49023_All
