# Supplementary material for: Identification of Functional Gene Modules Associated With STAT-Mediated Antiviral Responses to White Spot Syndrome Virus in Shrimp
Source: Front Physiol. 2019 Mar 11;10:212. doi: 10.3389/fphys.2019.00212 (PMC6421301; doi:10.3389/fphys.2019.00212)
Supplement: FILE S2 — Candidate modules specially affected by STAT during WSSV infection. [file Data_Sheet_2.ZIP › CMASWs/75.txt]

CL100.Contig3_All
CL1360.Contig16_All
CL1705.Contig2_All
CL2020.Contig3_All
CL2123.Contig2_All
CL2411.Contig3_All
CL2574.Contig2_All
CL2578.Contig4_All
CL2728.Contig2_All
CL2746.Contig4_All
CL3086.Contig2_All
CL326.Contig7_All
CL3322.Contig4_All
CL3365.Contig2_All
CL3447.Contig2_All
CL3571.Contig3_All
CL388.Contig1_All
CL4182.Contig2_All
CL4616.Contig1_All
CL4830.Contig5_All
CL4843.Contig2_All
CL536.Contig2_All
CL5775.Contig1_All
CL5811.Contig1_All
CL587.Contig1_All
CL661.Contig1_All
CL718.Contig2_All
CL857.Contig2_All
Unigene13988_All
Unigene14552_All
Unigene15719_All
Unigene20318_All
Unigene21554_All
Unigene21634_All
Unigene24759_All
Unigene26257_All
Unigene28645_All
Unigene29279_All
Unigene31445_All
Unigene32186_All
Unigene35731_All
Unigene37467_All
Unigene38906_All
Unigene39424_All
Unigene40309_All
Unigene42101_All
Unigene42627_All
Unigene43175_All
Unigene43428_All
Unigene47347_All
Unigene47868_All
Unigene48224_All
Unigene48864_All
Unigene7424_All
Unigene7678_All
