# Supplementary material for: Identification of Functional Gene Modules Associated With STAT-Mediated Antiviral Responses to White Spot Syndrome Virus in Shrimp
Source: Front Physiol. 2019 Mar 11;10:212. doi: 10.3389/fphys.2019.00212 (PMC6421301; doi:10.3389/fphys.2019.00212)
Supplement: FILE S2 — Candidate modules specially affected by STAT during WSSV infection. [file Data_Sheet_2.ZIP › CMASWs/80.txt]

CL1032.Contig1_All
CL1663.Contig6_All
CL1834.Contig1_All
CL2052.Contig6_All
CL2081.Contig2_All
CL2433.Contig2_All
CL2451.Contig2_All
CL2537.Contig1_All
CL2620.Contig1_All
CL2666.Contig3_All
CL273.Contig2_All
CL277.Contig4_All
CL2927.Contig3_All
CL3015.Contig2_All
CL315.Contig2_All
CL3224.Contig1_All
CL3237.Contig3_All
CL3283.Contig2_All
CL3322.Contig4_All
CL3508.Contig4_All
CL3611.Contig1_All
CL37.Contig17_All
CL3879.Contig3_All
CL398.Contig24_All
CL4182.Contig2_All
CL4370.Contig1_All
CL4426.Contig2_All
CL4708.Contig1_All
CL4737.Contig4_All
CL4806.Contig1_All
CL5023.Contig1_All
CL5169.Contig1_All
CL5278.Contig1_All
CL580.Contig5_All
CL5970.Contig1_All
CL6205.Contig2_All
CL654.Contig7_All
CL827.Contig2_All
CL946.Contig3_All
Unigene10006_All
Unigene10705_All
Unigene13538_All
Unigene1525_All
Unigene16735_All
Unigene18133_All
Unigene19202_All
Unigene21136_All
Unigene21411_All
Unigene21634_All
Unigene22143_All
Unigene22266_All
Unigene25507_All
Unigene25864_All
Unigene29297_All
Unigene31083_All
Unigene31334_All
Unigene33238_All
Unigene36771_All
Unigene39089_All
Unigene39221_All
Unigene39851_All
Unigene40534_All
Unigene40975_All
Unigene41587_All
Unigene42047_All
Unigene42298_All
Unigene43234_All
Unigene43235_All
Unigene43428_All
Unigene44393_All
Unigene45123_All
Unigene45167_All
Unigene45525_All
Unigene45897_All
Unigene46452_All
Unigene47730_All
Unigene47814_All
Unigene48382_All
Unigene48995_All
Unigene6622_All
Unigene6818_All
Unigene7088_All
Unigene7443_All
