# Supplementary material for: Identification of Functional Gene Modules Associated With STAT-Mediated Antiviral Responses to White Spot Syndrome Virus in Shrimp
Source: Front Physiol. 2019 Mar 11;10:212. doi: 10.3389/fphys.2019.00212 (PMC6421301; doi:10.3389/fphys.2019.00212)
Supplement: FILE S2 — Candidate modules specially affected by STAT during WSSV infection. [file Data_Sheet_2.ZIP › CMASWs/94.txt]

CL1054.Contig4_All
CL1257.Contig2_All
CL2046.Contig2_All
CL2842.Contig4_All
CL4623.Contig2_All
CL4635.Contig2_All
CL5793.Contig1_All
Unigene14640_All
Unigene16749_All
Unigene16857_All
Unigene18697_All
Unigene21097_All
Unigene24127_All
Unigene25361_All
Unigene2857_All
Unigene28644_All
Unigene32281_All
Unigene35170_All
Unigene37154_All
Unigene41711_All
Unigene44430_All
Unigene47813_All
Unigene50036_All
