# Supplementary material for: Identification of Functional Gene Modules Associated With STAT-Mediated Antiviral Responses to White Spot Syndrome Virus in Shrimp
Source: Front Physiol. 2019 Mar 11;10:212. doi: 10.3389/fphys.2019.00212 (PMC6421301; doi:10.3389/fphys.2019.00212)
Supplement: FILE S2 — Candidate modules specially affected by STAT during WSSV infection. [file Data_Sheet_2.ZIP › CMASWs/97.txt]

CL1462.Contig1_All
CL1955.Contig1_All
CL2652.Contig2_All
CL2797.Contig3_All
CL3940.Contig2_All
CL4535.Contig2_All
CL5011.Contig1_All
CL5308.Contig1_All
Unigene23814_All
Unigene24786_All
Unigene24993_All
Unigene25810_All
Unigene28869_All
Unigene28982_All
Unigene31272_All
Unigene39030_All
Unigene3981_All
Unigene41650_All
Unigene45005_All
Unigene45596_All
Unigene48585_All
Unigene5924_All
Unigene6712_All
Unigene8574_All
Unigene9976_All
