# Supplementary material for: Identification of Functional Gene Modules Associated With STAT-Mediated Antiviral Responses to White Spot Syndrome Virus in Shrimp
Source: Front Physiol. 2019 Mar 11;10:212. doi: 10.3389/fphys.2019.00212 (PMC6421301; doi:10.3389/fphys.2019.00212)
Supplement: FILE S2 — Candidate modules specially affected by STAT during WSSV infection. [file Data_Sheet_2.ZIP › CMASWs/154.txt]

CL1096.Contig2_All
CL1111.Contig2_All
CL1961.Contig3_All
CL2175.Contig3_All
CL3280.Contig2_All
CL5329.Contig1_All
CL576.Contig4_All
CL5881.Contig2_All
CL86.Contig1_All
CL966.Contig2_All
Unigene12628_All
Unigene23023_All
Unigene23024_All
Unigene23873_All
Unigene28779_All
Unigene381_All
Unigene38269_All
Unigene45749_All
Unigene46138_All
Unigene49476_All
Unigene6108_All
Unigene6243_All
