# Supplementary material for: Identification of Functional Gene Modules Associated With STAT-Mediated Antiviral Responses to White Spot Syndrome Virus in Shrimp
Source: Front Physiol. 2019 Mar 11;10:212. doi: 10.3389/fphys.2019.00212 (PMC6421301; doi:10.3389/fphys.2019.00212)
Supplement: FILE S2 — Candidate modules specially affected by STAT during WSSV infection. [file Data_Sheet_2.ZIP › CMASWs/155.txt]

CL2881.Contig3_All
CL3681.Contig1_All
CL3927.Contig2_All
CL5631.Contig1_All
CL676.Contig4_All
CL952.Contig3_All
Unigene12713_All
Unigene1295_All
Unigene13858_All
Unigene14286_All
Unigene14973_All
Unigene1524_All
Unigene18512_All
Unigene18705_All
Unigene21261_All
Unigene21981_All
Unigene22150_All
Unigene24645_All
Unigene24917_All
Unigene26598_All
Unigene29823_All
Unigene30013_All
Unigene30741_All
Unigene35878_All
Unigene41480_All
Unigene42043_All
Unigene43546_All
Unigene48489_All
Unigene49630_All
Unigene49800_All
Unigene49917_All
Unigene5187_All
Unigene6160_All
