# Supplementary material for: Identification of Functional Gene Modules Associated With STAT-Mediated Antiviral Responses to White Spot Syndrome Virus in Shrimp
Source: Front Physiol. 2019 Mar 11;10:212. doi: 10.3389/fphys.2019.00212 (PMC6421301; doi:10.3389/fphys.2019.00212)
Supplement: FILE S2 — Candidate modules specially affected by STAT during WSSV infection. [file Data_Sheet_2.ZIP › CMASWs/157.txt]

CL1190.Contig19_All
CL1475.Contig1_All
CL3283.Contig1_All
CL3508.Contig2_All
CL3681.Contig1_All
CL413.Contig7_All
CL4742.Contig1_All
CL5519.Contig1_All
CL644.Contig3_All
Unigene10745_All
Unigene13984_All
Unigene18373_All
Unigene18727_All
Unigene20383_All
Unigene22150_All
Unigene25427_All
Unigene2735_All
Unigene28334_All
Unigene29332_All
Unigene31282_All
Unigene33300_All
Unigene37353_All
Unigene38154_All
Unigene38195_All
Unigene3946_All
Unigene3952_All
Unigene43784_All
Unigene48944_All
