# Supplementary material for: Identification of Functional Gene Modules Associated With STAT-Mediated Antiviral Responses to White Spot Syndrome Virus in Shrimp
Source: Front Physiol. 2019 Mar 11;10:212. doi: 10.3389/fphys.2019.00212 (PMC6421301; doi:10.3389/fphys.2019.00212)
Supplement: FILE S2 — Candidate modules specially affected by STAT during WSSV infection. [file Data_Sheet_2.ZIP › CMASWs/159.txt]

CL1112.Contig1_All
CL1112.Contig2_All
CL1305.Contig1_All
CL1333.Contig3_All
CL140.Contig7_All
CL1467.Contig1_All
CL1504.Contig1_All
CL2079.Contig2_All
CL2277.Contig3_All
CL2331.Contig2_All
CL3089.Contig2_All
CL4464.Contig1_All
CL5322.Contig1_All
CL5728.Contig1_All
CL619.Contig18_All
Unigene13435_All
Unigene13906_All
Unigene13946_All
Unigene14706_All
Unigene15041_All
Unigene17283_All
Unigene19878_All
Unigene22351_All
Unigene2431_All
Unigene25000_All
Unigene2526_All
Unigene25821_All
Unigene26023_All
Unigene30017_All
Unigene31660_All
Unigene32672_All
Unigene32978_All
Unigene35084_All
Unigene36797_All
Unigene3831_All
Unigene39967_All
Unigene43798_All
Unigene46851_All
Unigene48554_All
Unigene6195_All
Unigene7433_All
Unigene8723_All
