# Supplementary material for: Identification of Functional Gene Modules Associated With STAT-Mediated Antiviral Responses to White Spot Syndrome Virus in Shrimp
Source: Front Physiol. 2019 Mar 11;10:212. doi: 10.3389/fphys.2019.00212 (PMC6421301; doi:10.3389/fphys.2019.00212)
Supplement: FILE S2 — Candidate modules specially affected by STAT during WSSV infection. [file Data_Sheet_2.ZIP › CMASWs/162.txt]

CL1333.Contig1_All
CL1444.Contig3_All
CL2506.Contig1_All
CL2734.Contig1_All
CL2967.Contig2_All
CL3331.Contig1_All
CL4131.Contig2_All
CL4135.Contig8_All
CL430.Contig2_All
CL4547.Contig2_All
CL4802.Contig1_All
CL5037.Contig2_All
CL5222.Contig2_All
CL5472.Contig1_All
CL5909.Contig1_All
CL610.Contig1_All
CL76.Contig8_All
CL82.Contig1_All
Unigene10317_All
Unigene14387_All
Unigene18075_All
Unigene18774_All
Unigene23680_All
Unigene26043_All
Unigene2782_All
Unigene28644_All
Unigene28743_All
Unigene32013_All
Unigene32962_All
Unigene3308_All
Unigene33814_All
Unigene36779_All
Unigene38785_All
Unigene39408_All
Unigene40514_All
Unigene42132_All
Unigene43865_All
Unigene47294_All
Unigene48138_All
Unigene48623_All
Unigene7494_All
Unigene8835_All
Unigene9357_All
