# Supplementary material for: Identification of Functional Gene Modules Associated With STAT-Mediated Antiviral Responses to White Spot Syndrome Virus in Shrimp
Source: Front Physiol. 2019 Mar 11;10:212. doi: 10.3389/fphys.2019.00212 (PMC6421301; doi:10.3389/fphys.2019.00212)
Supplement: FILE S2 — Candidate modules specially affected by STAT during WSSV infection. [file Data_Sheet_2.ZIP › CMASWs/170.txt]

CL1006.Contig11_All
CL125.Contig4_All
CL1467.Contig4_All
CL1472.Contig2_All
CL1848.Contig5_All
CL2259.Contig1_All
CL2408.Contig2_All
CL2532.Contig1_All
CL3118.Contig1_All
CL3444.Contig5_All
CL3447.Contig2_All
CL3645.Contig2_All
CL370.Contig3_All
CL3863.Contig1_All
CL4359.Contig1_All
CL4664.Contig3_All
CL4702.Contig1_All
CL521.Contig5_All
CL5320.Contig2_All
CL544.Contig4_All
CL5817.Contig2_All
CL5836.Contig1_All
CL587.Contig1_All
CL861.Contig1_All
CL980.Contig6_All
Unigene13337_All
Unigene14904_All
Unigene17750_All
Unigene20845_All
Unigene22081_All
Unigene22285_All
Unigene22295_All
Unigene22443_All
Unigene25133_All
Unigene25811_All
Unigene33053_All
Unigene36512_All
Unigene38815_All
Unigene39255_All
Unigene45773_All
Unigene46225_All
Unigene49400_All
Unigene9629_All
