# Supplementary material for: Identification of Functional Gene Modules Associated With STAT-Mediated Antiviral Responses to White Spot Syndrome Virus in Shrimp
Source: Front Physiol. 2019 Mar 11;10:212. doi: 10.3389/fphys.2019.00212 (PMC6421301; doi:10.3389/fphys.2019.00212)
Supplement: FILE S2 — Candidate modules specially affected by STAT during WSSV infection. [file Data_Sheet_2.ZIP › CMASWs/193.txt]

CL1569.Contig3_All
CL4200.Contig2_All
CL4537.Contig1_All
CL705.Contig6_All
CL980.Contig1_All
Unigene12888_All
Unigene15719_All
Unigene16895_All
Unigene17696_All
Unigene20926_All
Unigene24810_All
Unigene26034_All
Unigene29332_All
Unigene2983_All
Unigene30638_All
Unigene31068_All
Unigene33205_All
Unigene36068_All
Unigene38430_All
Unigene38484_All
Unigene43784_All
Unigene9253_All
