# Supplementary material for: Identification of Functional Gene Modules Associated With STAT-Mediated Antiviral Responses to White Spot Syndrome Virus in Shrimp
Source: Front Physiol. 2019 Mar 11;10:212. doi: 10.3389/fphys.2019.00212 (PMC6421301; doi:10.3389/fphys.2019.00212)
Supplement: FILE S2 — Candidate modules specially affected by STAT during WSSV infection. [file Data_Sheet_2.ZIP › CMASWs/203.txt]

CL1190.Contig2_All
CL1616.Contig1_All
CL1661.Contig1_All
CL1859.Contig2_All
CL2532.Contig1_All
CL3074.Contig5_All
CL3113.Contig3_All
CL4063.Contig1_All
CL4359.Contig1_All
CL4359.Contig2_All
CL4359.Contig3_All
CL4975.Contig2_All
CL498.Contig3_All
CL5003.Contig2_All
CL5078.Contig3_All
CL5082.Contig2_All
CL5412.Contig2_All
CL5817.Contig2_All
CL5866.Contig2_All
Unigene13509_All
Unigene14886_All
Unigene1746_All
Unigene20679_All
Unigene20845_All
Unigene21522_All
Unigene22443_All
Unigene25811_All
Unigene28398_All
Unigene29833_All
Unigene29875_All
Unigene43771_All
Unigene43900_All
Unigene48067_All
Unigene49041_All
Unigene49508_All
Unigene49606_All
