# Supplementary material for: Identification of Functional Gene Modules Associated With STAT-Mediated Antiviral Responses to White Spot Syndrome Virus in Shrimp
Source: Front Physiol. 2019 Mar 11;10:212. doi: 10.3389/fphys.2019.00212 (PMC6421301; doi:10.3389/fphys.2019.00212)
Supplement: FILE S2 — Candidate modules specially affected by STAT during WSSV infection. [file Data_Sheet_2.ZIP › CMASWs/208.txt]

CL1280.Contig4_All
CL156.Contig3_All
CL1653.Contig4_All
CL2421.Contig1_All
CL2573.Contig2_All
CL3533.Contig1_All
CL3564.Contig6_All
CL3855.Contig3_All
CL4199.Contig2_All
CL4575.Contig1_All
CL599.Contig1_All
CL656.Contig1_All
CL656.Contig3_All
CL656.Contig5_All
Unigene12224_All
Unigene15023_All
Unigene1525_All
Unigene17007_All
Unigene17236_All
Unigene1900_All
Unigene24097_All
Unigene24193_All
Unigene27678_All
Unigene28982_All
Unigene31021_All
Unigene3125_All
Unigene31272_All
Unigene31334_All
Unigene3260_All
Unigene36678_All
Unigene36884_All
Unigene40758_All
Unigene41230_All
Unigene44317_All
Unigene45342_All
Unigene47089_All
Unigene48585_All
Unigene6712_All
Unigene6947_All
Unigene7278_All
