# Supplementary material for: Identification of Functional Gene Modules Associated With STAT-Mediated Antiviral Responses to White Spot Syndrome Virus in Shrimp
Source: Front Physiol. 2019 Mar 11;10:212. doi: 10.3389/fphys.2019.00212 (PMC6421301; doi:10.3389/fphys.2019.00212)
Supplement: FILE S2 — Candidate modules specially affected by STAT during WSSV infection. [file Data_Sheet_2.ZIP › CMASWs/211.txt]

CL1550.Contig1_All
CL1603.Contig9_All
CL1815.Contig2_All
CL184.Contig1_All
CL2175.Contig3_All
CL2685.Contig1_All
CL277.Contig3_All
CL345.Contig2_All
CL6093.Contig2_All
Unigene14165_All
Unigene14211_All
Unigene16749_All
Unigene18697_All
Unigene21699_All
Unigene24657_All
Unigene29317_All
Unigene32088_All
Unigene34750_All
Unigene37928_All
Unigene40138_All
Unigene45380_All
Unigene45749_All
Unigene48431_All
Unigene48809_All
Unigene6093_All
