# Supplementary material for: Identification of Functional Gene Modules Associated With STAT-Mediated Antiviral Responses to White Spot Syndrome Virus in Shrimp
Source: Front Physiol. 2019 Mar 11;10:212. doi: 10.3389/fphys.2019.00212 (PMC6421301; doi:10.3389/fphys.2019.00212)
Supplement: FILE S2 — Candidate modules specially affected by STAT during WSSV infection. [file Data_Sheet_2.ZIP › CMASWs/213.txt]

CL1096.Contig2_All
CL1184.Contig1_All
CL2175.Contig3_All
CL4933.Contig4_All
CL5095.Contig1_All
CL5253.Contig1_All
CL586.Contig3_All
CL587.Contig2_All
CL5881.Contig2_All
CL599.Contig1_All
CL811.Contig1_All
CL823.Contig3_All
Unigene13327_All
Unigene14629_All
Unigene14734_All
Unigene18051_All
Unigene20685_All
Unigene37048_All
Unigene3731_All
Unigene381_All
Unigene38269_All
Unigene44225_All
Unigene50068_All
Unigene6108_All
