# Supplementary material for: Identification of Functional Gene Modules Associated With STAT-Mediated Antiviral Responses to White Spot Syndrome Virus in Shrimp
Source: Front Physiol. 2019 Mar 11;10:212. doi: 10.3389/fphys.2019.00212 (PMC6421301; doi:10.3389/fphys.2019.00212)
Supplement: FILE S2 — Candidate modules specially affected by STAT during WSSV infection. [file Data_Sheet_2.ZIP › CMASWs/215.txt]

CL1512.Contig3_All
CL1821.Contig2_All
CL1900.Contig1_All
CL2017.Contig1_All
CL2017.Contig2_All
CL2905.Contig2_All
CL3948.Contig1_All
CL4278.Contig1_All
CL5540.Contig2_All
CL861.Contig2_All
Unigene14902_All
Unigene16036_All
Unigene17903_All
Unigene18685_All
Unigene20967_All
Unigene22520_All
Unigene2366_All
Unigene24216_All
Unigene26557_All
Unigene29191_All
Unigene29326_All
Unigene30810_All
Unigene31615_All
Unigene32891_All
Unigene33185_All
Unigene35863_All
Unigene44398_All
Unigene7381_All
