# Supplementary material for: Identification of Functional Gene Modules Associated With STAT-Mediated Antiviral Responses to White Spot Syndrome Virus in Shrimp
Source: Front Physiol. 2019 Mar 11;10:212. doi: 10.3389/fphys.2019.00212 (PMC6421301; doi:10.3389/fphys.2019.00212)
Supplement: FILE S2 — Candidate modules specially affected by STAT during WSSV infection. [file Data_Sheet_2.ZIP › CMASWs/224.txt]

CL1093.Contig4_All
CL207.Contig18_All
CL2157.Contig7_All
CL2272.Contig3_All
CL2500.Contig1_All
CL2832.Contig1_All
CL3223.Contig2_All
CL4190.Contig1_All
CL470.Contig2_All
CL4722.Contig1_All
CL4963.Contig1_All
CL5580.Contig2_All
CL5859.Contig2_All
CL889.Contig7_All
Unigene12548_All
Unigene16873_All
Unigene17696_All
Unigene25116_All
Unigene29976_All
Unigene32891_All
Unigene33456_All
Unigene3573_All
Unigene36837_All
Unigene41055_All
Unigene4142_All
Unigene46937_All
Unigene48005_All
Unigene49604_All
Unigene9231_All
