# Supplementary material for: Identification of Functional Gene Modules Associated With STAT-Mediated Antiviral Responses to White Spot Syndrome Virus in Shrimp
Source: Front Physiol. 2019 Mar 11;10:212. doi: 10.3389/fphys.2019.00212 (PMC6421301; doi:10.3389/fphys.2019.00212)
Supplement: FILE S2 — Candidate modules specially affected by STAT during WSSV infection. [file Data_Sheet_2.ZIP › CMASWs/230.txt]

CL1243.Contig2_All
CL244.Contig2_All
CL4063.Contig3_All
CL4508.Contig1_All
CL4696.Contig2_All
CL4722.Contig1_All
CL5284.Contig1_All
CL582.Contig2_All
CL587.Contig2_All
CL76.Contig2_All
Unigene10813_All
Unigene12817_All
Unigene14894_All
Unigene14952_All
Unigene21767_All
Unigene28719_All
Unigene31412_All
Unigene35106_All
Unigene46392_All
Unigene5105_All
Unigene669_All
Unigene95_All
