# Supplementary material for: Identification of Functional Gene Modules Associated With STAT-Mediated Antiviral Responses to White Spot Syndrome Virus in Shrimp
Source: Front Physiol. 2019 Mar 11;10:212. doi: 10.3389/fphys.2019.00212 (PMC6421301; doi:10.3389/fphys.2019.00212)
Supplement: FILE S2 — Candidate modules specially affected by STAT during WSSV infection. [file Data_Sheet_2.ZIP › CMASWs/231.txt]

CL1111.Contig2_All
CL1961.Contig3_All
CL2093.Contig3_All
CL2175.Contig3_All
CL2458.Contig2_All
CL3017.Contig2_All
CL3109.Contig1_All
CL3833.Contig2_All
CL5273.Contig2_All
CL5573.Contig2_All
CL5674.Contig2_All
CL5881.Contig2_All
CL86.Contig1_All
CL966.Contig2_All
Unigene10753_All
Unigene11874_All
Unigene12628_All
Unigene14835_All
Unigene16825_All
Unigene23854_All
Unigene25177_All
Unigene25557_All
Unigene37347_All
Unigene44173_All
Unigene4615_All
Unigene49476_All
Unigene6243_All
