# Supplementary material for: Identification of Functional Gene Modules Associated With STAT-Mediated Antiviral Responses to White Spot Syndrome Virus in Shrimp
Source: Front Physiol. 2019 Mar 11;10:212. doi: 10.3389/fphys.2019.00212 (PMC6421301; doi:10.3389/fphys.2019.00212)
Supplement: FILE S2 — Candidate modules specially affected by STAT during WSSV infection. [file Data_Sheet_2.ZIP › CMASWs/250.txt]

CL11.Contig2_All
CL161.Contig6_All
CL1834.Contig1_All
CL3007.Contig3_All
CL3206.Contig2_All
CL434.Contig2_All
CL4799.Contig1_All
CL5052.Contig2_All
CL5111.Contig2_All
CL5193.Contig1_All
CL5212.Contig1_All
Unigene10051_All
Unigene1527_All
Unigene18455_All
Unigene21948_All
Unigene2445_All
Unigene25203_All
Unigene28307_All
Unigene28417_All
Unigene29297_All
Unigene30012_All
Unigene36292_All
Unigene40670_All
Unigene41003_All
Unigene42298_All
Unigene42850_All
Unigene43235_All
Unigene45064_All
Unigene46477_All
Unigene49421_All
Unigene7341_All
