# Supplementary material for: Identification of Functional Gene Modules Associated With STAT-Mediated Antiviral Responses to White Spot Syndrome Virus in Shrimp
Source: Front Physiol. 2019 Mar 11;10:212. doi: 10.3389/fphys.2019.00212 (PMC6421301; doi:10.3389/fphys.2019.00212)
Supplement: FILE S2 — Candidate modules specially affected by STAT during WSSV infection. [file Data_Sheet_2.ZIP › CMASWs/253.txt]

CL1067.Contig1_All
CL1190.Contig19_All
CL2865.Contig1_All
CL3214.Contig4_All
CL3215.Contig2_All
CL4166.Contig2_All
CL4383.Contig1_All
CL4778.Contig1_All
CL732.Contig3_All
CL952.Contig3_All
Unigene11201_All
Unigene13037_All
Unigene14369_All
Unigene16524_All
Unigene17685_All
Unigene21261_All
Unigene2181_All
Unigene35801_All
Unigene44704_All
Unigene9151_All
Unigene9751_All
