# Supplementary material for: Identification of Functional Gene Modules Associated With STAT-Mediated Antiviral Responses to White Spot Syndrome Virus in Shrimp
Source: Front Physiol. 2019 Mar 11;10:212. doi: 10.3389/fphys.2019.00212 (PMC6421301; doi:10.3389/fphys.2019.00212)
Supplement: FILE S2 — Candidate modules specially affected by STAT during WSSV infection. [file Data_Sheet_2.ZIP › CMASWs/263.txt]

CL1.Contig2_All
CL1105.Contig2_All
CL3212.Contig3_All
CL3290.Contig1_All
CL3594.Contig4_All
CL4537.Contig2_All
CL5616.Contig1_All
CL889.Contig5_All
Unigene14038_All
Unigene18136_All
Unigene22081_All
Unigene23887_All
Unigene24704_All
Unigene24738_All
Unigene28288_All
Unigene28621_All
Unigene29566_All
Unigene3516_All
Unigene36037_All
Unigene36515_All
Unigene40335_All
Unigene43282_All
Unigene44922_All
Unigene45716_All
Unigene46396_All
Unigene48489_All
Unigene6334_All
Unigene7183_All
