# Supplementary material for: Identification of Functional Gene Modules Associated With STAT-Mediated Antiviral Responses to White Spot Syndrome Virus in Shrimp
Source: Front Physiol. 2019 Mar 11;10:212. doi: 10.3389/fphys.2019.00212 (PMC6421301; doi:10.3389/fphys.2019.00212)
Supplement: FILE S2 — Candidate modules specially affected by STAT during WSSV infection. [file Data_Sheet_2.ZIP › CMASWs/295.txt]

CL1783.Contig5_All
CL2644.Contig2_All
CL3343.Contig1_All
CL3940.Contig2_All
CL3993.Contig2_All
CL5004.Contig1_All
CL751.Contig6_All
Unigene10498_All
Unigene10894_All
Unigene14280_All
Unigene14706_All
Unigene25972_All
Unigene26323_All
Unigene33495_All
Unigene34810_All
Unigene37555_All
Unigene42477_All
Unigene44493_All
Unigene44788_All
Unigene45107_All
Unigene49469_All
Unigene6437_All
Unigene7506_All
