# Supplementary material for: Identification of Functional Gene Modules Associated With STAT-Mediated Antiviral Responses to White Spot Syndrome Virus in Shrimp
Source: Front Physiol. 2019 Mar 11;10:212. doi: 10.3389/fphys.2019.00212 (PMC6421301; doi:10.3389/fphys.2019.00212)
Supplement: FILE S2 — Candidate modules specially affected by STAT during WSSV infection. [file Data_Sheet_2.ZIP › CMASWs/304.txt]

CL1167.Contig2_All
CL2402.Contig1_All
CL2614.Contig4_All
CL2918.Contig2_All
CL3134.Contig4_All
CL4340.Contig1_All
CL4456.Contig1_All
CL4915.Contig1_All
CL5158.Contig2_All
CL5583.Contig2_All
CL6212.Contig2_All
CL97.Contig24_All
Unigene10006_All
Unigene10498_All
Unigene1206_All
Unigene12113_All
Unigene14517_All
Unigene14706_All
Unigene16328_All
Unigene18062_All
Unigene18205_All
Unigene18799_All
Unigene20840_All
Unigene21716_All
Unigene2528_All
Unigene25290_All
Unigene25646_All
Unigene26015_All
Unigene28231_All
Unigene32672_All
Unigene33332_All
Unigene36596_All
Unigene37907_All
Unigene44493_All
Unigene45360_All
Unigene46350_All
Unigene47836_All
Unigene5896_All
Unigene6437_All
