# Supplementary material for: Identification of Functional Gene Modules Associated With STAT-Mediated Antiviral Responses to White Spot Syndrome Virus in Shrimp
Source: Front Physiol. 2019 Mar 11;10:212. doi: 10.3389/fphys.2019.00212 (PMC6421301; doi:10.3389/fphys.2019.00212)
Supplement: FILE S2 — Candidate modules specially affected by STAT during WSSV infection. [file Data_Sheet_2.ZIP › CMASWs/312.txt]

CL1064.Contig1_All
CL1174.Contig3_All
CL1596.Contig1_All
CL2900.Contig5_All
CL2916.Contig2_All
CL3140.Contig5_All
CL3671.Contig2_All
CL4335.Contig1_All
CL4623.Contig2_All
CL4668.Contig1_All
CL478.Contig2_All
CL4830.Contig3_All
CL681.Contig2_All
Unigene10041_All
Unigene10304_All
Unigene1045_All
Unigene12113_All
Unigene12711_All
Unigene13233_All
Unigene14104_All
Unigene14580_All
Unigene15009_All
Unigene17467_All
Unigene17566_All
Unigene1856_All
Unigene19719_All
Unigene20535_All
Unigene21716_All
Unigene22211_All
Unigene24220_All
Unigene2441_All
Unigene25137_All
Unigene25529_All
Unigene26048_All
Unigene2810_All
Unigene28559_All
Unigene29170_All
Unigene3026_All
Unigene32340_All
Unigene32414_All
Unigene3950_All
Unigene42931_All
Unigene44507_All
Unigene45215_All
Unigene45754_All
Unigene46331_All
Unigene46886_All
Unigene47253_All
Unigene47813_All
Unigene50126_All
