# Supplementary material for: Identification of Functional Gene Modules Associated With STAT-Mediated Antiviral Responses to White Spot Syndrome Virus in Shrimp
Source: Front Physiol. 2019 Mar 11;10:212. doi: 10.3389/fphys.2019.00212 (PMC6421301; doi:10.3389/fphys.2019.00212)
Supplement: FILE S2 — Candidate modules specially affected by STAT during WSSV infection. [file Data_Sheet_2.ZIP › CMASWs/314.txt]

CL1157.Contig2_All
CL1973.Contig1_All
CL1980.Contig2_All
CL2040.Contig1_All
CL213.Contig1_All
CL2169.Contig8_All
CL2200.Contig1_All
CL2761.Contig4_All
CL3254.Contig2_All
CL3285.Contig2_All
CL3594.Contig1_All
CL4659.Contig2_All
CL4984.Contig1_All
CL637.Contig3_All
CL718.Contig3_All
Unigene10431_All
Unigene12260_All
Unigene13484_All
Unigene17331_All
Unigene17898_All
Unigene18689_All
Unigene1985_All
Unigene20226_All
Unigene20932_All
Unigene23376_All
Unigene2432_All
Unigene27426_All
Unigene29619_All
Unigene29875_All
Unigene32130_All
Unigene33407_All
Unigene33732_All
Unigene3568_All
Unigene3665_All
Unigene39462_All
Unigene41387_All
Unigene41833_All
Unigene4313_All
Unigene44251_All
Unigene44774_All
Unigene45823_All
Unigene46043_All
Unigene47250_All
Unigene47549_All
Unigene6_All
Unigene8013_All
