# Supplementary material for: Identification of Functional Gene Modules Associated With STAT-Mediated Antiviral Responses to White Spot Syndrome Virus in Shrimp
Source: Front Physiol. 2019 Mar 11;10:212. doi: 10.3389/fphys.2019.00212 (PMC6421301; doi:10.3389/fphys.2019.00212)
Supplement: FILE S2 — Candidate modules specially affected by STAT during WSSV infection. [file Data_Sheet_2.ZIP › CMASWs/317.txt]

CL1399.Contig2_All
CL3075.Contig2_All
CL4237.Contig1_All
CL5493.Contig1_All
CL5494.Contig1_All
CL5544.Contig1_All
CL5623.Contig1_All
CL5710.Contig1_All
CL76.Contig9_All
Unigene10471_All
Unigene11195_All
Unigene11535_All
Unigene13447_All
Unigene13547_All
Unigene17390_All
Unigene17412_All
Unigene18591_All
Unigene19531_All
Unigene25478_All
Unigene29470_All
Unigene29614_All
Unigene2987_All
Unigene30396_All
Unigene32143_All
Unigene32695_All
Unigene33333_All
Unigene35081_All
Unigene35199_All
Unigene37158_All
Unigene42840_All
Unigene44387_All
Unigene44545_All
Unigene45812_All
Unigene46382_All
Unigene48164_All
Unigene5830_All
Unigene6392_All
Unigene7397_All
