# Supplementary material for: Identification of Functional Gene Modules Associated With STAT-Mediated Antiviral Responses to White Spot Syndrome Virus in Shrimp
Source: Front Physiol. 2019 Mar 11;10:212. doi: 10.3389/fphys.2019.00212 (PMC6421301; doi:10.3389/fphys.2019.00212)
Supplement: FILE S2 — Candidate modules specially affected by STAT during WSSV infection. [file Data_Sheet_2.ZIP › CMASWs/340.txt]

CL1224.Contig2_All
CL1267.Contig2_All
CL140.Contig8_All
CL1449.Contig2_All
CL150.Contig3_All
CL1517.Contig1_All
CL1848.Contig7_All
CL2033.Contig2_All
CL213.Contig2_All
CL2139.Contig8_All
CL2139.Contig9_All
CL2198.Contig2_All
CL2222.Contig3_All
CL2347.Contig1_All
CL2470.Contig1_All
CL2787.Contig3_All
CL2989.Contig1_All
CL3101.Contig3_All
CL3662.Contig3_All
CL3774.Contig1_All
CL4259.Contig3_All
CL4274.Contig1_All
CL4523.Contig3_All
CL4581.Contig1_All
CL4625.Contig1_All
CL5492.Contig1_All
CL5617.Contig2_All
CL699.Contig1_All
CL756.Contig5_All
CL96.Contig43_All
Unigene10967_All
Unigene11266_All
Unigene17422_All
Unigene1748_All
Unigene18643_All
Unigene24650_All
Unigene25003_All
Unigene25692_All
Unigene29357_All
Unigene3114_All
Unigene31947_All
Unigene32136_All
Unigene33114_All
Unigene36235_All
Unigene37353_All
Unigene38548_All
Unigene38807_All
Unigene41189_All
Unigene42705_All
Unigene43848_All
Unigene45511_All
Unigene45636_All
Unigene46747_All
Unigene47434_All
Unigene48531_All
Unigene49453_All
Unigene6485_All
Unigene70_All
Unigene7265_All
