# Supplementary material for: Identification of Functional Gene Modules Associated With STAT-Mediated Antiviral Responses to White Spot Syndrome Virus in Shrimp
Source: Front Physiol. 2019 Mar 11;10:212. doi: 10.3389/fphys.2019.00212 (PMC6421301; doi:10.3389/fphys.2019.00212)
Supplement: FILE S2 — Candidate modules specially affected by STAT during WSSV infection. [file Data_Sheet_2.ZIP › CMASWs/345.txt]

CL1190.Contig12_All
CL1244.Contig3_All
CL1476.Contig2_All
CL2200.Contig1_All
CL2573.Contig2_All
CL5805.Contig3_All
CL6033.Contig1_All
CL6194.Contig1_All
CL97.Contig24_All
Unigene10498_All
Unigene16328_All
Unigene18205_All
Unigene24585_All
Unigene25646_All
Unigene25810_All
Unigene27385_All
Unigene28810_All
Unigene334_All
Unigene35934_All
Unigene36546_All
Unigene36848_All
Unigene36884_All
Unigene48826_All
Unigene49962_All
Unigene5924_All
