# Supplementary material for: Identification of Functional Gene Modules Associated With STAT-Mediated Antiviral Responses to White Spot Syndrome Virus in Shrimp
Source: Front Physiol. 2019 Mar 11;10:212. doi: 10.3389/fphys.2019.00212 (PMC6421301; doi:10.3389/fphys.2019.00212)
Supplement: FILE S2 — Candidate modules specially affected by STAT during WSSV infection. [file Data_Sheet_2.ZIP › CMASWs/358.txt]

CL2006.Contig3_All
CL2189.Contig5_All
CL237.Contig16_All
CL3229.Contig2_All
CL3595.Contig3_All
CL3793.Contig2_All
CL4492.Contig1_All
CL5175.Contig2_All
Unigene10971_All
Unigene17060_All
Unigene18334_All
Unigene2520_All
Unigene25810_All
Unigene34702_All
Unigene36687_All
Unigene40587_All
Unigene41650_All
Unigene42220_All
Unigene47249_All
Unigene48322_All
Unigene49540_All
Unigene5982_All
Unigene8703_All
