# Supplementary material for: Identification of Functional Gene Modules Associated With STAT-Mediated Antiviral Responses to White Spot Syndrome Virus in Shrimp
Source: Front Physiol. 2019 Mar 11;10:212. doi: 10.3389/fphys.2019.00212 (PMC6421301; doi:10.3389/fphys.2019.00212)
Supplement: FILE S2 — Candidate modules specially affected by STAT during WSSV infection. [file Data_Sheet_2.ZIP › CMASWs/360.txt]

CL1317.Contig2_All
CL1667.Contig4_All
CL2903.Contig1_All
CL4116.Contig3_All
CL4264.Contig2_All
CL4279.Contig2_All
CL4518.Contig1_All
CL4529.Contig1_All
CL4618.Contig3_All
CL4641.Contig2_All
CL5095.Contig1_All
CL5130.Contig2_All
CL590.Contig1_All
Unigene10894_All
Unigene11308_All
Unigene17342_All
Unigene18145_All
Unigene18217_All
Unigene21809_All
Unigene26203_All
Unigene29124_All
Unigene29343_All
Unigene31400_All
Unigene39224_All
Unigene39850_All
Unigene40132_All
Unigene47873_All
Unigene48826_All
Unigene4905_All
