# Supplementary material for: Identification of Functional Gene Modules Associated With STAT-Mediated Antiviral Responses to White Spot Syndrome Virus in Shrimp
Source: Front Physiol. 2019 Mar 11;10:212. doi: 10.3389/fphys.2019.00212 (PMC6421301; doi:10.3389/fphys.2019.00212)
Supplement: FILE S2 — Candidate modules specially affected by STAT during WSSV infection. [file Data_Sheet_2.ZIP › CMASWs/373.txt]

CL1307.Contig4_All
CL2619.Contig3_All
CL3005.Contig2_All
CL3363.Contig1_All
CL3586.Contig1_All
CL4769.Contig2_All
CL4977.Contig2_All
CL5616.Contig2_All
Unigene1032_All
Unigene13383_All
Unigene13531_All
Unigene20552_All
Unigene24934_All
Unigene34958_All
Unigene39066_All
Unigene44542_All
Unigene45176_All
Unigene6033_All
