# Supplementary material for: Identification of Functional Gene Modules Associated With STAT-Mediated Antiviral Responses to White Spot Syndrome Virus in Shrimp
Source: Front Physiol. 2019 Mar 11;10:212. doi: 10.3389/fphys.2019.00212 (PMC6421301; doi:10.3389/fphys.2019.00212)
Supplement: FILE S2 — Candidate modules specially affected by STAT during WSSV infection. [file Data_Sheet_2.ZIP › CMASWs/375.txt]

CL1120.Contig3_All
CL120.Contig67_All
CL1519.Contig2_All
CL1535.Contig6_All
CL1579.Contig1_All
CL161.Contig28_All
CL2451.Contig4_All
CL2532.Contig3_All
CL2782.Contig1_All
CL284.Contig3_All
CL2957.Contig1_All
CL3123.Contig1_All
CL3144.Contig2_All
CL3261.Contig2_All
CL3374.Contig2_All
CL3544.Contig2_All
CL398.Contig14_All
CL398.Contig3_All
CL4091.Contig5_All
CL4135.Contig7_All
CL4303.Contig2_All
CL4339.Contig2_All
CL4599.Contig2_All
CL5415.Contig1_All
CL5567.Contig2_All
CL5964.Contig2_All
CL6214.Contig3_All
CL727.Contig5_All
CL756.Contig4_All
CL76.Contig8_All
CL817.Contig1_All
CL891.Contig1_All
CL922.Contig1_All
Unigene10306_All
Unigene10419_All
Unigene10798_All
Unigene11125_All
Unigene11617_All
Unigene13548_All
Unigene14497_All
Unigene15692_All
Unigene17350_All
Unigene17530_All
Unigene17634_All
Unigene18731_All
Unigene19409_All
Unigene21215_All
Unigene22365_All
Unigene2278_All
Unigene24709_All
Unigene25918_All
Unigene2671_All
Unigene2679_All
Unigene27167_All
Unigene27556_All
Unigene28787_All
Unigene2890_All
Unigene29328_All
Unigene32411_All
Unigene32516_All
Unigene33242_All
Unigene34781_All
Unigene3507_All
Unigene36278_All
Unigene36384_All
Unigene36404_All
Unigene38433_All
Unigene39807_All
Unigene39853_All
Unigene42132_All
Unigene43441_All
Unigene44295_All
Unigene44329_All
Unigene44495_All
Unigene44568_All
Unigene44807_All
Unigene45259_All
Unigene47983_All
Unigene48157_All
Unigene48464_All
Unigene49573_All
Unigene50180_All
Unigene5213_All
Unigene6965_All
Unigene7547_All
Unigene8050_All
Unigene8329_All
Unigene9224_All
