# Supplementary material for: Identification of Functional Gene Modules Associated With STAT-Mediated Antiviral Responses to White Spot Syndrome Virus in Shrimp
Source: Front Physiol. 2019 Mar 11;10:212. doi: 10.3389/fphys.2019.00212 (PMC6421301; doi:10.3389/fphys.2019.00212)
Supplement: FILE S2 — Candidate modules specially affected by STAT during WSSV infection. [file Data_Sheet_2.ZIP › CMASWs/377.txt]

CL1317.Contig2_All
CL3215.Contig1_All
CL3235.Contig2_All
CL3237.Contig3_All
CL3343.Contig1_All
CL4156.Contig2_All
CL4279.Contig2_All
CL4518.Contig1_All
Unigene10342_All
Unigene10894_All
Unigene13639_All
Unigene17741_All
Unigene20566_All
Unigene20861_All
Unigene2512_All
Unigene25972_All
Unigene26003_All
Unigene26124_All
Unigene26203_All
Unigene29343_All
Unigene29362_All
Unigene33508_All
Unigene39224_All
Unigene43234_All
Unigene43900_All
Unigene48826_All
Unigene5301_All
Unigene7506_All
