# Supplementary material for: Identification of Functional Gene Modules Associated With STAT-Mediated Antiviral Responses to White Spot Syndrome Virus in Shrimp
Source: Front Physiol. 2019 Mar 11;10:212. doi: 10.3389/fphys.2019.00212 (PMC6421301; doi:10.3389/fphys.2019.00212)
Supplement: FILE S2 — Candidate modules specially affected by STAT during WSSV infection. [file Data_Sheet_2.ZIP › CMASWs/383.txt]

CL1120.Contig4_All
CL2402.Contig1_All
CL343.Contig2_All
CL372.Contig1_All
CL3940.Contig2_All
CL4009.Contig2_All
CL420.Contig3_All
Unigene10455_All
Unigene16328_All
Unigene1663_All
Unigene1770_All
Unigene18799_All
Unigene20840_All
Unigene26032_All
Unigene33396_All
Unigene37060_All
Unigene37907_All
Unigene44788_All
Unigene45667_All
