# Supplementary material for: Identification of Functional Gene Modules Associated With STAT-Mediated Antiviral Responses to White Spot Syndrome Virus in Shrimp
Source: Front Physiol. 2019 Mar 11;10:212. doi: 10.3389/fphys.2019.00212 (PMC6421301; doi:10.3389/fphys.2019.00212)
Supplement: FILE S2 — Candidate modules specially affected by STAT during WSSV infection. [file Data_Sheet_2.ZIP › CMASWs/394.txt]

CL1243.Contig2_All
CL1999.Contig1_All
CL2147.Contig2_All
CL2842.Contig4_All
CL2965.Contig4_All
CL3136.Contig1_All
CL3190.Contig1_All
CL3713.Contig1_All
CL4002.Contig5_All
CL4623.Contig2_All
CL4702.Contig2_All
CL86.Contig10_All
CL86.Contig11_All
CL86.Contig9_All
Unigene10556_All
Unigene10918_All
Unigene11192_All
Unigene16857_All
Unigene21324_All
Unigene23568_All
Unigene23821_All
Unigene24127_All
Unigene2844_All
Unigene28944_All
Unigene33044_All
Unigene34326_All
Unigene3770_All
Unigene41711_All
Unigene42931_All
Unigene44430_All
Unigene45818_All
Unigene49150_All
Unigene7255_All
