# Supplementary material for: Identification of Functional Gene Modules Associated With STAT-Mediated Antiviral Responses to White Spot Syndrome Virus in Shrimp
Source: Front Physiol. 2019 Mar 11;10:212. doi: 10.3389/fphys.2019.00212 (PMC6421301; doi:10.3389/fphys.2019.00212)
Supplement: FILE S2 — Candidate modules specially affected by STAT during WSSV infection. [file Data_Sheet_2.ZIP › CMASWs/413.txt]

CL1057.Contig1_All
CL1417.Contig1_All
CL1961.Contig3_All
CL2458.Contig2_All
CL2619.Contig3_All
CL4769.Contig2_All
CL4977.Contig2_All
CL5674.Contig2_All
CL5881.Contig2_All
CL823.Contig3_All
Unigene11874_All
Unigene12628_All
Unigene24795_All
Unigene25177_All
Unigene25557_All
Unigene33311_All
Unigene34958_All
Unigene38269_All
Unigene49476_All
Unigene6243_All
Unigene6592_All
