# Supplementary material for: Identification of Functional Gene Modules Associated With STAT-Mediated Antiviral Responses to White Spot Syndrome Virus in Shrimp
Source: Front Physiol. 2019 Mar 11;10:212. doi: 10.3389/fphys.2019.00212 (PMC6421301; doi:10.3389/fphys.2019.00212)
Supplement: FILE S2 — Candidate modules specially affected by STAT during WSSV infection. [file Data_Sheet_2.ZIP › CMASWs/418.txt]

CL1064.Contig2_All
CL113.Contig2_All
CL1646.Contig1_All
CL1788.Contig2_All
CL1859.Contig2_All
CL2158.Contig3_All
CL2475.Contig1_All
CL2648.Contig1_All
CL2918.Contig3_All
CL3332.Contig2_All
CL398.Contig17_All
CL4793.Contig1_All
CL5333.Contig1_All
CL6039.Contig2_All
CL758.Contig1_All
Unigene10306_All
Unigene10712_All
Unigene13623_All
Unigene13852_All
Unigene17500_All
Unigene21415_All
Unigene24442_All
Unigene24951_All
Unigene27275_All
Unigene29366_All
Unigene31392_All
Unigene32363_All
Unigene32480_All
Unigene32867_All
Unigene34003_All
Unigene37850_All
Unigene37922_All
Unigene40593_All
Unigene41746_All
Unigene42125_All
Unigene43181_All
Unigene46773_All
Unigene7190_All
