# Supplementary material for: Identification of Functional Gene Modules Associated With STAT-Mediated Antiviral Responses to White Spot Syndrome Virus in Shrimp
Source: Front Physiol. 2019 Mar 11;10:212. doi: 10.3389/fphys.2019.00212 (PMC6421301; doi:10.3389/fphys.2019.00212)
Supplement: FILE S2 — Candidate modules specially affected by STAT during WSSV infection. [file Data_Sheet_2.ZIP › CMASWs/420.txt]

CL3266.Contig2_All
CL3483.Contig3_All
CL4184.Contig2_All
CL4266.Contig3_All
CL4703.Contig2_All
CL492.Contig6_All
CL5037.Contig2_All
Unigene17663_All
Unigene18378_All
Unigene2857_All
Unigene29047_All
Unigene29429_All
Unigene3032_All
Unigene31567_All
Unigene33065_All
Unigene33344_All
Unigene33814_All
Unigene37154_All
Unigene45749_All
Unigene46138_All
Unigene6093_All
Unigene6104_All
Unigene8999_All
