# Supplementary material for: Identification of Functional Gene Modules Associated With STAT-Mediated Antiviral Responses to White Spot Syndrome Virus in Shrimp
Source: Front Physiol. 2019 Mar 11;10:212. doi: 10.3389/fphys.2019.00212 (PMC6421301; doi:10.3389/fphys.2019.00212)
Supplement: FILE S2 — Candidate modules specially affected by STAT during WSSV infection. [file Data_Sheet_2.ZIP › CMASWs/425.txt]

CL1021.Contig3_All
CL1094.Contig2_All
CL1109.Contig1_All
CL1112.Contig1_All
CL1125.Contig1_All
CL1140.Contig1_All
CL1140.Contig4_All
CL1140.Contig5_All
CL1204.Contig1_All
CL1204.Contig2_All
CL121.Contig2_All
CL123.Contig5_All
CL1244.Contig1_All
CL1264.Contig2_All
CL1280.Contig1_All
CL1280.Contig3_All
CL1280.Contig5_All
CL1331.Contig2_All
CL1385.Contig2_All
CL1386.Contig2_All
CL1411.Contig5_All
CL1418.Contig3_All
CL1446.Contig1_All
CL1446.Contig2_All
CL145.Contig1_All
CL145.Contig2_All
CL1478.Contig4_All
CL1560.Contig1_All
CL1560.Contig2_All
CL1575.Contig4_All
CL1583.Contig5_All
CL166.Contig2_All
CL1679.Contig2_All
CL1695.Contig1_All
CL1727.Contig1_All
CL1727.Contig2_All
CL1763.Contig3_All
CL1768.Contig1_All
CL1814.Contig5_All
CL1864.Contig2_All
CL1891.Contig1_All
CL1891.Contig2_All
CL1892.Contig1_All
CL1896.Contig1_All
CL1902.Contig1_All
CL1910.Contig2_All
CL202.Contig3_All
CL2042.Contig1_All
CL2042.Contig2_All
CL2058.Contig5_All
CL207.Contig28_All
CL2100.Contig3_All
CL2186.Contig2_All
CL2196.Contig1_All
CL2196.Contig3_All
CL2196.Contig4_All
CL2219.Contig2_All
CL2277.Contig3_All
CL2373.Contig3_All
CL2374.Contig1_All
CL2389.Contig2_All
CL2395.Contig1_All
CL2432.Contig2_All
CL2460.Contig1_All
CL2460.Contig2_All
CL2460.Contig3_All
CL2467.Contig5_All
CL2554.Contig1_All
CL2554.Contig2_All
CL2560.Contig1_All
CL2583.Contig2_All
CL2665.Contig2_All
CL2718.Contig2_All
CL2770.Contig1_All
CL2797.Contig1_All
CL2840.Contig1_All
CL2843.Contig1_All
CL2877.Contig2_All
CL2894.Contig1_All
CL2894.Contig2_All
CL2894.Contig3_All
CL2913.Contig1_All
CL2919.Contig1_All
CL2989.Contig1_All
CL299.Contig3_All
CL300.Contig2_All
CL3009.Contig2_All
CL301.Contig1_All
CL303.Contig2_All
CL303.Contig4_All
CL3113.Contig1_All
CL3113.Contig2_All
CL3113.Contig4_All
CL3113.Contig6_All
CL3140.Contig1_All
CL3140.Contig3_All
CL3156.Contig2_All
CL32.Contig1_All
CL32.Contig2_All
CL3207.Contig1_All
CL3212.Contig2_All
CL3344.Contig2_All
CL335.Contig1_All
CL335.Contig2_All
CL3362.Contig1_All
CL3362.Contig2_All
CL340.Contig1_All
CL3410.Contig3_All
CL3411.Contig2_All
CL3414.Contig1_All
CL3457.Contig1_All
CL3496.Contig2_All
CL3545.Contig2_All
CL3551.Contig1_All
CL3561.Contig1_All
CL3633.Contig1_All
CL3694.Contig3_All
CL3694.Contig4_All
CL3760.Contig3_All
CL3799.Contig1_All
CL385.Contig1_All
CL3880.Contig1_All
CL3953.Contig2_All
CL3980.Contig2_All
CL401.Contig2_All
CL4118.Contig1_All
CL4141.Contig1_All
CL4189.Contig2_All
CL4261.Contig2_All
CL4277.Contig1_All
CL4277.Contig2_All
CL4300.Contig1_All
CL4308.Contig1_All
CL4320.Contig2_All
CL4330.Contig2_All
CL4400.Contig2_All
CL4435.Contig2_All
CL4462.Contig2_All
CL449.Contig4_All
CL4491.Contig2_All
CL4554.Contig1_All
CL4554.Contig3_All
CL4590.Contig2_All
CL4597.Contig1_All
CL4597.Contig2_All
CL4600.Contig1_All
CL466.Contig1_All
CL4663.Contig1_All
CL4663.Contig2_All
CL4714.Contig1_All
CL4724.Contig3_All
CL4735.Contig4_All
CL4739.Contig1_All
CL4757.Contig1_All
CL4833.Contig1_All
CL4833.Contig2_All
CL4901.Contig1_All
CL4901.Contig2_All
CL4917.Contig1_All
CL4917.Contig2_All
CL4959.Contig2_All
CL4959.Contig3_All
CL4959.Contig4_All
CL4972.Contig1_All
CL5019.Contig1_All
CL5059.Contig2_All
CL5082.Contig2_All
CL5206.Contig2_All
CL5230.Contig1_All
CL5230.Contig2_All
CL5230.Contig3_All
CL5230.Contig4_All
CL5274.Contig3_All
CL5281.Contig2_All
CL5298.Contig1_All
CL5298.Contig2_All
CL5318.Contig1_All
CL5318.Contig2_All
CL5322.Contig1_All
CL5357.Contig2_All
CL5467.Contig3_All
CL5469.Contig1_All
CL5491.Contig1_All
CL5499.Contig2_All
CL550.Contig1_All
CL5508.Contig2_All
CL5519.Contig9_All
CL5555.Contig1_All
CL5555.Contig2_All
CL5728.Contig3_All
CL5735.Contig2_All
CL5803.Contig2_All
CL5832.Contig2_All
CL5837.Contig2_All
CL5849.Contig2_All
CL5908.Contig1_All
CL5908.Contig2_All
CL5949.Contig2_All
CL6021.Contig1_All
CL6043.Contig1_All
CL605.Contig2_All
CL6057.Contig2_All
CL6103.Contig2_All
CL6108.Contig1_All
CL6108.Contig2_All
CL6118.Contig1_All
CL6252.Contig2_All
CL6280.Contig2_All
CL6288.Contig1_All
CL6288.Contig2_All
CL632.Contig1_All
CL645.Contig1_All
CL645.Contig7_All
CL650.Contig1_All
CL650.Contig2_All
CL672.Contig3_All
CL677.Contig2_All
CL677.Contig4_All
CL677.Contig5_All
CL694.Contig1_All
CL694.Contig2_All
CL739.Contig1_All
CL739.Contig2_All
CL769.Contig2_All
CL769.Contig3_All
CL815.Contig1_All
CL818.Contig1_All
CL850.Contig1_All
CL862.Contig1_All
CL905.Contig1_All
CL905.Contig3_All
CL905.Contig4_All
CL905.Contig6_All
CL929.Contig8_All
CL93.Contig2_All
CL954.Contig2_All
CL960.Contig1_All
CL960.Contig2_All
CL985.Contig1_All
CL985.Contig2_All
CL985.Contig3_All
CL985.Contig4_All
CL995.Contig1_All
Unigene10133_All
Unigene10152_All
Unigene10212_All
Unigene10284_All
Unigene10463_All
Unigene10506_All
Unigene10574_All
Unigene10655_All
Unigene10793_All
Unigene10810_All
Unigene10826_All
Unigene10862_All
Unigene11052_All
Unigene1116_All
Unigene11200_All
Unigene11318_All
Unigene11383_All
Unigene1140_All
Unigene1142_All
Unigene11438_All
Unigene11673_All
Unigene11674_All
Unigene12054_All
Unigene1214_All
Unigene12250_All
Unigene12566_All
Unigene12681_All
Unigene12896_All
Unigene12950_All
Unigene12978_All
Unigene13106_All
Unigene13221_All
Unigene13343_All
Unigene13413_All
Unigene13418_All
Unigene13473_All
Unigene1352_All
Unigene13546_All
Unigene13568_All
Unigene13592_All
Unigene13604_All
Unigene13663_All
Unigene13673_All
Unigene1368_All
Unigene13721_All
Unigene13742_All
Unigene13871_All
Unigene14003_All
Unigene14107_All
Unigene14137_All
Unigene14152_All
Unigene14264_All
Unigene14297_All
Unigene14334_All
Unigene14378_All
Unigene14445_All
Unigene14446_All
Unigene14470_All
Unigene14546_All
Unigene14637_All
Unigene1464_All
Unigene14767_All
Unigene14803_All
Unigene15007_All
Unigene15180_All
Unigene15372_All
Unigene15380_All
Unigene15381_All
Unigene15520_All
Unigene15770_All
Unigene15890_All
Unigene15951_All
Unigene16049_All
Unigene16050_All
Unigene16073_All
Unigene16111_All
Unigene16113_All
Unigene16177_All
Unigene1622_All
Unigene16329_All
Unigene16542_All
Unigene1672_All
Unigene16790_All
Unigene16812_All
Unigene16876_All
Unigene16989_All
Unigene17140_All
Unigene17264_All
Unigene17458_All
Unigene17520_All
Unigene17596_All
Unigene17639_All
Unigene17940_All
Unigene17993_All
Unigene18038_All
Unigene18050_All
Unigene18052_All
Unigene18055_All
Unigene18063_All
Unigene18065_All
Unigene18153_All
Unigene18179_All
Unigene18193_All
Unigene18253_All
Unigene18622_All
Unigene18765_All
Unigene1882_All
Unigene18869_All
Unigene1891_All
Unigene19114_All
Unigene19115_All
Unigene19227_All
Unigene19233_All
Unigene19788_All
Unigene19799_All
Unigene19818_All
Unigene19933_All
Unigene19985_All
Unigene1999_All
Unigene20034_All
Unigene2008_All
Unigene20100_All
Unigene20287_All
Unigene20422_All
Unigene20457_All
Unigene20537_All
Unigene2067_All
Unigene20705_All
Unigene20872_All
Unigene20896_All
Unigene20925_All
Unigene21007_All
Unigene21050_All
Unigene21117_All
Unigene21140_All
Unigene21161_All
Unigene21175_All
Unigene21377_All
Unigene21398_All
Unigene21572_All
Unigene21579_All
Unigene21588_All
Unigene21653_All
Unigene21657_All
Unigene21675_All
Unigene21729_All
Unigene21755_All
Unigene21765_All
Unigene21792_All
Unigene21906_All
Unigene21980_All
Unigene22074_All
Unigene22168_All
Unigene22212_All
Unigene2221_All
Unigene22332_All
Unigene22338_All
Unigene2238_All
Unigene22428_All
Unigene22441_All
Unigene22444_All
Unigene22446_All
Unigene22447_All
Unigene22733_All
Unigene22983_All
Unigene23175_All
Unigene23316_All
Unigene23482_All
Unigene23501_All
Unigene2350_All
Unigene23517_All
Unigene2357_All
Unigene2359_All
Unigene23865_All
Unigene24118_All
Unigene24227_All
Unigene24236_All
Unigene24307_All
Unigene24328_All
Unigene24381_All
Unigene24497_All
Unigene2449_All
Unigene24555_All
Unigene24701_All
Unigene24767_All
Unigene24839_All
Unigene2490_All
Unigene24910_All
Unigene24924_All
Unigene24929_All
Unigene24962_All
Unigene25067_All
Unigene25127_All
Unigene25188_All
Unigene25198_All
Unigene25211_All
Unigene25214_All
Unigene25272_All
Unigene25477_All
Unigene25540_All
Unigene25550_All
Unigene25654_All
Unigene25677_All
Unigene25759_All
Unigene25891_All
Unigene25902_All
Unigene25968_All
Unigene2605_All
Unigene26141_All
Unigene26154_All
Unigene26171_All
Unigene26858_All
Unigene27180_All
Unigene27284_All
Unigene2742_All
Unigene27445_All
Unigene27486_All
Unigene27497_All
Unigene27570_All
Unigene27645_All
Unigene27709_All
Unigene27724_All
Unigene27753_All
Unigene27798_All
Unigene27817_All
Unigene27836_All
Unigene27969_All
Unigene28078_All
Unigene28113_All
Unigene28204_All
Unigene28291_All
Unigene28688_All
Unigene28689_All
Unigene28794_All
Unigene28862_All
Unigene28889_All
Unigene2893_All
Unigene28978_All
Unigene28997_All
Unigene29021_All
Unigene2903_All
Unigene29067_All
Unigene29085_All
Unigene29141_All
Unigene29275_All
Unigene29300_All
Unigene2934_All
Unigene29597_All
Unigene2964_All
Unigene29766_All
Unigene29844_All
Unigene2990_All
Unigene30035_All
Unigene30057_All
Unigene30160_All
Unigene30700_All
Unigene30918_All
Unigene31066_All
Unigene3113_All
Unigene31145_All
Unigene31159_All
Unigene31265_All
Unigene3128_All
Unigene31343_All
Unigene31402_All
Unigene31406_All
Unigene31417_All
Unigene3145_All
Unigene3150_All
Unigene31513_All
Unigene31532_All
Unigene3161_All
Unigene31660_All
Unigene31676_All
Unigene31725_All
Unigene31757_All
Unigene31833_All
Unigene31991_All
Unigene32006_All
Unigene32045_All
Unigene32157_All
Unigene32222_All
Unigene32298_All
Unigene3247_All
Unigene32583_All
Unigene32669_All
Unigene32674_All
Unigene32759_All
Unigene32888_All
Unigene33016_All
Unigene33192_All
Unigene33199_All
Unigene33228_All
Unigene33318_All
Unigene33351_All
Unigene33395_All
Unigene33438_All
Unigene33465_All
Unigene33473_All
Unigene33595_All
Unigene33603_All
Unigene33702_All
Unigene33851_All
Unigene33927_All
Unigene34000_All
Unigene34057_All
Unigene3406_All
Unigene34087_All
Unigene3438_All
Unigene34514_All
Unigene34540_All
Unigene34562_All
Unigene3468_All
Unigene34698_All
Unigene34760_All
Unigene34850_All
Unigene34947_All
Unigene35047_All
Unigene35141_All
Unigene35298_All
Unigene35401_All
Unigene35491_All
Unigene35492_All
Unigene35499_All
Unigene35613_All
Unigene3566_All
Unigene35720_All
Unigene35737_All
Unigene35831_All
Unigene35847_All
Unigene35861_All
Unigene35917_All
Unigene35956_All
Unigene36108_All
Unigene36205_All
Unigene36386_All
Unigene36475_All
Unigene36482_All
Unigene36507_All
Unigene36509_All
Unigene36510_All
Unigene36568_All
Unigene36630_All
Unigene36701_All
Unigene36706_All
Unigene3673_All
Unigene36748_All
Unigene3678_All
Unigene3680_All
Unigene37050_All
Unigene37118_All
Unigene37152_All
Unigene37171_All
Unigene37256_All
Unigene37594_All
Unigene37667_All
Unigene37869_All
Unigene37945_All
Unigene38654_All
Unigene38789_All
Unigene39137_All
Unigene39405_All
Unigene39688_All
Unigene39825_All
Unigene39857_All
Unigene39880_All
Unigene4167_All
Unigene41739_All
Unigene4239_All
Unigene4301_All
Unigene43444_All
Unigene4363_All
Unigene4364_All
Unigene43736_All
Unigene44000_All
Unigene44065_All
Unigene44403_All
Unigene44428_All
Unigene44444_All
Unigene44486_All
Unigene44501_All
Unigene44505_All
Unigene44522_All
Unigene44523_All
Unigene44550_All
Unigene44552_All
Unigene44561_All
Unigene44576_All
Unigene44587_All
Unigene44610_All
Unigene44626_All
Unigene44652_All
Unigene44686_All
Unigene44798_All
Unigene44834_All
Unigene44899_All
Unigene45016_All
Unigene45098_All
Unigene45118_All
Unigene45132_All
Unigene45143_All
Unigene45207_All
Unigene45213_All
Unigene45233_All
Unigene452_All
Unigene45324_All
Unigene4534_All
Unigene45399_All
Unigene45429_All
Unigene45456_All
Unigene454_All
Unigene45538_All
Unigene45572_All
Unigene45630_All
Unigene45681_All
Unigene45698_All
Unigene45787_All
Unigene45911_All
Unigene46497_All
Unigene46500_All
Unigene46537_All
Unigene46578_All
Unigene46579_All
Unigene46583_All
Unigene46592_All
Unigene46661_All
Unigene47206_All
Unigene47245_All
Unigene47295_All
Unigene47623_All
Unigene48106_All
Unigene48416_All
Unigene48466_All
Unigene48482_All
Unigene48545_All
Unigene48628_All
Unigene48676_All
Unigene48711_All
Unigene49041_All
Unigene4913_All
Unigene49153_All
Unigene49278_All
Unigene4936_All
Unigene49372_All
Unigene4938_All
Unigene49454_All
Unigene49497_All
Unigene4970_All
Unigene49794_All
Unigene5098_All
Unigene5142_All
Unigene5169_All
Unigene5170_All
Unigene5306_All
Unigene5406_All
Unigene555_All
Unigene5635_All
Unigene5931_All
Unigene5939_All
Unigene634_All
Unigene6422_All
Unigene6495_All
Unigene6554_All
Unigene6581_All
Unigene6589_All
Unigene6632_All
Unigene6685_All
Unigene6773_All
Unigene6778_All
Unigene6833_All
Unigene6881_All
Unigene6931_All
Unigene696_All
Unigene7274_All
Unigene7480_All
Unigene7482_All
Unigene754_All
Unigene7564_All
Unigene7618_All
Unigene7627_All
Unigene7774_All
Unigene7775_All
Unigene8000_All
Unigene8176_All
Unigene8185_All
Unigene826_All
Unigene8290_All
Unigene8460_All
Unigene8503_All
Unigene8576_All
Unigene8823_All
Unigene8884_All
Unigene8964_All
Unigene8982_All
Unigene8996_All
Unigene9073_All
Unigene9101_All
Unigene9359_All
Unigene9463_All
Unigene9747_All
Unigene9755_All
Unigene9918_All
