# Supplementary material for: Identification of Functional Gene Modules Associated With STAT-Mediated Antiviral Responses to White Spot Syndrome Virus in Shrimp
Source: Front Physiol. 2019 Mar 11;10:212. doi: 10.3389/fphys.2019.00212 (PMC6421301; doi:10.3389/fphys.2019.00212)
Supplement: FILE S2 — Candidate modules specially affected by STAT during WSSV infection. [file Data_Sheet_2.ZIP › CMASWs/428.txt]

CL1034.Contig2_All
CL1221.Contig3_All
CL1569.Contig1_All
CL2052.Contig8_All
CL2871.Contig2_All
CL3089.Contig1_All
CL496.Contig1_All
CL5788.Contig1_All
CL5798.Contig3_All
CL5800.Contig2_All
CL637.Contig3_All
CL681.Contig1_All
Unigene10431_All
Unigene10572_All
Unigene12699_All
Unigene13484_All
Unigene14788_All
Unigene16051_All
Unigene16734_All
Unigene17898_All
Unigene18689_All
Unigene22312_All
Unigene22360_All
Unigene2507_All
Unigene31430_All
Unigene31730_All
Unigene32130_All
Unigene3497_All
Unigene36398_All
Unigene38403_All
Unigene41517_All
Unigene41833_All
Unigene44271_All
Unigene46527_All
Unigene48105_All
Unigene48498_All
Unigene6560_All
