# Supplementary material for: Identification of Functional Gene Modules Associated With STAT-Mediated Antiviral Responses to White Spot Syndrome Virus in Shrimp
Source: Front Physiol. 2019 Mar 11;10:212. doi: 10.3389/fphys.2019.00212 (PMC6421301; doi:10.3389/fphys.2019.00212)
Supplement: FILE S2 — Candidate modules specially affected by STAT during WSSV infection. [file Data_Sheet_2.ZIP › CMASWs/429.txt]

CL1002.Contig2_All
CL119.Contig1_All
CL1290.Contig2_All
CL1475.Contig1_All
CL3215.Contig2_All
CL3508.Contig2_All
CL3681.Contig1_All
CL3812.Contig1_All
CL4066.Contig1_All
CL4514.Contig1_All
CL4769.Contig2_All
CL5674.Contig2_All
CL802.Contig4_All
CL886.Contig2_All
Unigene10745_All
Unigene12628_All
Unigene12924_All
Unigene16836_All
Unigene25177_All
Unigene26024_All
Unigene28908_All
Unigene29663_All
Unigene33311_All
Unigene36280_All
Unigene3952_All
Unigene41228_All
Unigene41508_All
Unigene42129_All
Unigene44704_All
