# Supplementary material for: Identification of Functional Gene Modules Associated With STAT-Mediated Antiviral Responses to White Spot Syndrome Virus in Shrimp
Source: Front Physiol. 2019 Mar 11;10:212. doi: 10.3389/fphys.2019.00212 (PMC6421301; doi:10.3389/fphys.2019.00212)
Supplement: FILE S2 — Candidate modules specially affected by STAT during WSSV infection. [file Data_Sheet_2.ZIP › CMASWs/430.txt]

CL1015.Contig3_All
CL1050.Contig1_All
CL2146.Contig1_All
CL2227.Contig2_All
CL2344.Contig1_All
CL2619.Contig3_All
CL3474.Contig2_All
CL397.Contig1_All
CL4453.Contig1_All
CL4830.Contig5_All
CL4977.Contig2_All
CL5434.Contig2_All
CL5953.Contig2_All
CL713.Contig1_All
Unigene13988_All
Unigene14874_All
Unigene16784_All
Unigene21409_All
Unigene2250_All
Unigene28778_All
Unigene33179_All
Unigene3602_All
Unigene38293_All
Unigene38850_All
Unigene46207_All
