# Supplementary material for: Identification of Functional Gene Modules Associated With STAT-Mediated Antiviral Responses to White Spot Syndrome Virus in Shrimp
Source: Front Physiol. 2019 Mar 11;10:212. doi: 10.3389/fphys.2019.00212 (PMC6421301; doi:10.3389/fphys.2019.00212)
Supplement: FILE S2 — Candidate modules specially affected by STAT during WSSV infection. [file Data_Sheet_2.ZIP › CMASWs/432.txt]

CL1976.Contig4_All
CL2293.Contig1_All
CL3242.Contig1_All
CL3654.Contig2_All
CL3722.Contig2_All
CL3722.Contig4_All
CL398.Contig25_All
CL4061.Contig2_All
CL4115.Contig2_All
CL794.Contig2_All
CL86.Contig7_All
CL872.Contig1_All
CL889.Contig7_All
CL980.Contig1_All
Unigene10436_All
Unigene17696_All
Unigene17810_All
Unigene20393_All
Unigene25116_All
Unigene32677_All
Unigene36471_All
Unigene37347_All
Unigene38484_All
Unigene43784_All
Unigene45405_All
Unigene47177_All
Unigene49150_All
Unigene8337_All
