# Supplementary material for: Identification of Functional Gene Modules Associated With STAT-Mediated Antiviral Responses to White Spot Syndrome Virus in Shrimp
Source: Front Physiol. 2019 Mar 11;10:212. doi: 10.3389/fphys.2019.00212 (PMC6421301; doi:10.3389/fphys.2019.00212)
Supplement: FILE S2 — Candidate modules specially affected by STAT during WSSV infection. [file Data_Sheet_2.ZIP › CMASWs/433.txt]

CL1315.Contig4_All
CL150.Contig3_All
CL1517.Contig1_All
CL1848.Contig7_All
CL2033.Contig2_All
CL213.Contig2_All
CL2139.Contig9_All
CL2222.Contig3_All
CL2470.Contig1_All
CL3005.Contig2_All
CL3690.Contig2_All
CL3694.Contig1_All
CL3774.Contig1_All
CL4653.Contig1_All
CL4769.Contig2_All
CL5617.Contig2_All
CL756.Contig5_All
Unigene10967_All
Unigene11266_All
Unigene12957_All
Unigene14113_All
Unigene1748_All
Unigene18643_All
Unigene24200_All
Unigene25003_All
Unigene25177_All
Unigene25370_All
Unigene25497_All
Unigene25692_All
Unigene31947_All
Unigene32736_All
Unigene36235_All
Unigene38548_All
Unigene41189_All
Unigene41297_All
Unigene42129_All
Unigene42705_All
Unigene47482_All
Unigene48536_All
Unigene49453_All
Unigene70_All
