# Supplementary material for: Identification of Functional Gene Modules Associated With STAT-Mediated Antiviral Responses to White Spot Syndrome Virus in Shrimp
Source: Front Physiol. 2019 Mar 11;10:212. doi: 10.3389/fphys.2019.00212 (PMC6421301; doi:10.3389/fphys.2019.00212)
Supplement: FILE S2 — Candidate modules specially affected by STAT during WSSV infection. [file Data_Sheet_2.ZIP › CMASWs/436.txt]

CL1190.Contig2_All
CL1196.Contig2_All
CL1490.Contig3_All
CL2006.Contig2_All
CL2927.Contig3_All
CL3153.Contig5_All
CL3237.Contig2_All
CL4367.Contig1_All
CL4789.Contig2_All
CL5206.Contig2_All
CL5559.Contig1_All
CL827.Contig2_All
CL856.Contig1_All
Unigene11308_All
Unigene13509_All
Unigene13643_All
Unigene14432_All
Unigene16804_All
Unigene21809_All
Unigene25864_All
Unigene31977_All
Unigene32959_All
Unigene33113_All
Unigene34711_All
Unigene43384_All
Unigene45764_All
Unigene50053_All
