# Supplementary material for: Identification of Functional Gene Modules Associated With STAT-Mediated Antiviral Responses to White Spot Syndrome Virus in Shrimp
Source: Front Physiol. 2019 Mar 11;10:212. doi: 10.3389/fphys.2019.00212 (PMC6421301; doi:10.3389/fphys.2019.00212)
Supplement: FILE S2 — Candidate modules specially affected by STAT during WSSV infection. [file Data_Sheet_2.ZIP › CMASWs/449.txt]

CL1267.Contig4_All
CL1461.Contig1_All
CL2002.Contig2_All
CL2812.Contig2_All
CL320.Contig20_All
CL4208.Contig1_All
CL4336.Contig3_All
CL462.Contig2_All
CL4675.Contig2_All
CL5212.Contig1_All
CL5761.Contig2_All
CL6081.Contig2_All
CL6237.Contig3_All
CL6314.Contig1_All
Unigene10218_All
Unigene10673_All
Unigene11070_All
Unigene11913_All
Unigene13168_All
Unigene14195_All
Unigene16071_All
Unigene16562_All
Unigene17381_All
Unigene18455_All
Unigene2252_All
Unigene25234_All
Unigene26108_All
Unigene28209_All
Unigene28725_All
Unigene40812_All
Unigene41151_All
Unigene42850_All
Unigene6031_All
Unigene6831_All
Unigene9433_All
