# Supplementary material for: Identification of Functional Gene Modules Associated With STAT-Mediated Antiviral Responses to White Spot Syndrome Virus in Shrimp
Source: Front Physiol. 2019 Mar 11;10:212. doi: 10.3389/fphys.2019.00212 (PMC6421301; doi:10.3389/fphys.2019.00212)
Supplement: FILE S2 — Candidate modules specially affected by STAT during WSSV infection. [file Data_Sheet_2.ZIP › CMASWs/455.txt]

CL3344.Contig2_All
CL3601.Contig2_All
CL37.Contig25_All
CL4709.Contig3_All
CL4771.Contig5_All
CL53.Contig1_All
CL5499.Contig2_All
CL5632.Contig2_All
CL96.Contig43_All
CL981.Contig1_All
Unigene15483_All
Unigene21522_All
Unigene21953_All
Unigene28824_All
Unigene30807_All
Unigene31115_All
Unigene32190_All
Unigene32680_All
Unigene3576_All
Unigene38832_All
Unigene42063_All
Unigene42905_All
Unigene49693_All
Unigene9446_All
