# Supplementary material for: Identification of Functional Gene Modules Associated With STAT-Mediated Antiviral Responses to White Spot Syndrome Virus in Shrimp
Source: Front Physiol. 2019 Mar 11;10:212. doi: 10.3389/fphys.2019.00212 (PMC6421301; doi:10.3389/fphys.2019.00212)
Supplement: FILE S2 — Candidate modules specially affected by STAT during WSSV infection. [file Data_Sheet_2.ZIP › CMASWs/459.txt]

CL163.Contig8_All
CL1981.Contig1_All
CL2380.Contig2_All
CL4206.Contig1_All
CL4749.Contig3_All
CL4771.Contig2_All
CL5765.Contig2_All
CL88.Contig9_All
Unigene11346_All
Unigene15115_All
Unigene18116_All
Unigene2146_All
Unigene25419_All
Unigene3162_All
Unigene32947_All
Unigene37068_All
Unigene38293_All
Unigene39525_All
Unigene42649_All
Unigene43145_All
Unigene44650_All
Unigene45269_All
Unigene46781_All
