# Supplementary material for: Identification of Functional Gene Modules Associated With STAT-Mediated Antiviral Responses to White Spot Syndrome Virus in Shrimp
Source: Front Physiol. 2019 Mar 11;10:212. doi: 10.3389/fphys.2019.00212 (PMC6421301; doi:10.3389/fphys.2019.00212)
Supplement: FILE S2 — Candidate modules specially affected by STAT during WSSV infection. [file Data_Sheet_2.ZIP › CMASWs/479.txt]

CL1182.Contig11_All
CL1465.Contig2_All
CL151.Contig2_All
CL164.Contig2_All
CL17.Contig21_All
CL181.Contig2_All
CL190.Contig2_All
CL2205.Contig1_All
CL2848.Contig1_All
CL2859.Contig1_All
CL3220.Contig2_All
CL3342.Contig1_All
CL3449.Contig2_All
CL3960.Contig1_All
CL398.Contig2_All
CL4135.Contig11_All
CL4236.Contig6_All
CL4269.Contig1_All
CL472.Contig2_All
CL485.Contig2_All
CL5021.Contig1_All
CL5106.Contig1_All
CL5256.Contig1_All
CL5689.Contig2_All
CL579.Contig1_All
CL5875.Contig1_All
CL6057.Contig1_All
CL6323.Contig2_All
CL6357.Contig1_All
CL708.Contig3_All
CL743.Contig7_All
CL96.Contig41_All
Unigene102_All
Unigene10484_All
Unigene10993_All
Unigene11160_All
Unigene12744_All
Unigene13362_All
Unigene14054_All
Unigene14259_All
Unigene1559_All
Unigene16109_All
Unigene1812_All
Unigene18370_All
Unigene18484_All
Unigene19494_All
Unigene19540_All
Unigene19583_All
Unigene19945_All
Unigene20726_All
Unigene20860_All
Unigene22023_All
Unigene22053_All
Unigene22139_All
Unigene22632_All
Unigene23088_All
Unigene23573_All
Unigene23915_All
Unigene24452_All
Unigene24589_All
Unigene24746_All
Unigene25466_All
Unigene2567_All
Unigene26679_All
Unigene27481_All
Unigene27620_All
Unigene2820_All
Unigene2846_All
Unigene29090_All
Unigene29676_All
Unigene30190_All
Unigene30201_All
Unigene31251_All
Unigene32567_All
Unigene32955_All
Unigene33188_All
Unigene33386_All
Unigene33428_All
Unigene34113_All
Unigene36288_All
Unigene37230_All
Unigene3761_All
Unigene38127_All
Unigene38501_All
Unigene38666_All
Unigene40515_All
Unigene40642_All
Unigene41400_All
Unigene41646_All
Unigene4215_All
Unigene42202_All
Unigene44760_All
Unigene46489_All
Unigene47371_All
Unigene47498_All
Unigene47589_All
Unigene47746_All
Unigene47844_All
Unigene47965_All
Unigene48109_All
Unigene48122_All
Unigene49647_All
Unigene5650_All
Unigene5699_All
Unigene6672_All
Unigene8155_All
Unigene9278_All
Unigene9863_All
