# Supplementary material for: Identification of Functional Gene Modules Associated With STAT-Mediated Antiviral Responses to White Spot Syndrome Virus in Shrimp
Source: Front Physiol. 2019 Mar 11;10:212. doi: 10.3389/fphys.2019.00212 (PMC6421301; doi:10.3389/fphys.2019.00212)
Supplement: FILE S2 — Candidate modules specially affected by STAT during WSSV infection. [file Data_Sheet_2.ZIP › CMASWs/482.txt]

CL1399.Contig2_All
CL1474.Contig2_All
CL1571.Contig2_All
CL1651.Contig1_All
CL1836.Contig2_All
CL1881.Contig1_All
CL1921.Contig2_All
CL2059.Contig1_All
CL2168.Contig1_All
CL2227.Contig2_All
CL224.Contig4_All
CL2441.Contig9_All
CL2578.Contig3_All
CL2685.Contig2_All
CL2738.Contig3_All
CL2901.Contig1_All
CL2934.Contig1_All
CL3331.Contig1_All
CL5063.Contig1_All
CL5494.Contig1_All
CL5544.Contig1_All
CL748.Contig1_All
CL997.Contig4_All
Unigene10471_All
Unigene14141_All
Unigene14656_All
Unigene14969_All
Unigene14998_All
Unigene17412_All
Unigene18306_All
Unigene22323_All
Unigene23764_All
Unigene25314_All
Unigene25478_All
Unigene28170_All
Unigene28603_All
Unigene32441_All
Unigene33333_All
Unigene40309_All
Unigene4078_All
Unigene41895_All
Unigene43624_All
Unigene44463_All
Unigene46886_All
Unigene48238_All
Unigene48970_All
Unigene7018_All
