# Supplementary material for: Identification of Functional Gene Modules Associated With STAT-Mediated Antiviral Responses to White Spot Syndrome Virus in Shrimp
Source: Front Physiol. 2019 Mar 11;10:212. doi: 10.3389/fphys.2019.00212 (PMC6421301; doi:10.3389/fphys.2019.00212)
Supplement: FILE S2 — Candidate modules specially affected by STAT during WSSV infection. [file Data_Sheet_2.ZIP › CMASWs/499.txt]

CL1472.Contig1_All
CL148.Contig2_All
CL1535.Contig6_All
CL1961.Contig3_All
CL2002.Contig1_All
CL2351.Contig2_All
CL2415.Contig4_All
CL3263.Contig1_All
CL3891.Contig1_All
CL4276.Contig1_All
CL4857.Contig1_All
CL5273.Contig2_All
CL86.Contig1_All
Unigene12628_All
Unigene14835_All
Unigene16825_All
Unigene20391_All
Unigene23854_All
Unigene28465_All
Unigene32327_All
Unigene33411_All
Unigene35254_All
Unigene35256_All
Unigene3628_All
Unigene44173_All
Unigene49053_All
Unigene49558_All
Unigene50096_All
Unigene5642_All
