# Supplementary material for: Identification of Functional Gene Modules Associated With STAT-Mediated Antiviral Responses to White Spot Syndrome Virus in Shrimp
Source: Front Physiol. 2019 Mar 11;10:212. doi: 10.3389/fphys.2019.00212 (PMC6421301; doi:10.3389/fphys.2019.00212)
Supplement: FILE S2 — Candidate modules specially affected by STAT during WSSV infection. [file Data_Sheet_2.ZIP › CMASWs/515.txt]

CL102.Contig4_All
CL1799.Contig4_All
CL2004.Contig2_All
CL2934.Contig1_All
CL31.Contig2_All
CL3190.Contig1_All
CL4383.Contig1_All
CL5544.Contig1_All
CL5623.Contig1_All
CL637.Contig2_All
Unigene10355_All
Unigene10392_All
Unigene11192_All
Unigene12532_All
Unigene13002_All
Unigene13016_All
Unigene13921_All
Unigene16040_All
Unigene16903_All
Unigene17685_All
Unigene18242_All
Unigene18454_All
Unigene21025_All
Unigene24795_All
Unigene24851_All
Unigene25220_All
Unigene2630_All
Unigene27571_All
Unigene29277_All
Unigene29553_All
Unigene31058_All
Unigene3772_All
Unigene46290_All
Unigene47645_All
Unigene48939_All
Unigene7018_All
Unigene7479_All
Unigene9330_All
Unigene9358_All
