# Supplementary material for: Identification of Functional Gene Modules Associated With STAT-Mediated Antiviral Responses to White Spot Syndrome Virus in Shrimp
Source: Front Physiol. 2019 Mar 11;10:212. doi: 10.3389/fphys.2019.00212 (PMC6421301; doi:10.3389/fphys.2019.00212)
Supplement: FILE S2 — Candidate modules specially affected by STAT during WSSV infection. [file Data_Sheet_2.ZIP › CMASWs/516.txt]

CL1006.Contig11_All
CL1020.Contig1_All
CL1190.Contig2_All
CL125.Contig4_All
CL1467.Contig4_All
CL1661.Contig1_All
CL1848.Contig5_All
CL2408.Contig2_All
CL2532.Contig1_All
CL3074.Contig5_All
CL3113.Contig3_All
CL3118.Contig1_All
CL3645.Contig2_All
CL3863.Contig1_All
CL4359.Contig1_All
CL4359.Contig2_All
CL4359.Contig3_All
CL4664.Contig3_All
CL4702.Contig1_All
CL5078.Contig3_All
CL5320.Contig2_All
CL544.Contig4_All
CL5817.Contig2_All
CL5836.Contig1_All
CL823.Contig1_All
CL83.Contig41_All
CL861.Contig1_All
Unigene13337_All
Unigene14886_All
Unigene20679_All
Unigene20845_All
Unigene22081_All
Unigene22295_All
Unigene22443_All
Unigene25133_All
Unigene25811_All
Unigene33053_All
Unigene38815_All
Unigene39255_All
Unigene43771_All
Unigene46225_All
Unigene49400_All
Unigene9629_All
