# Supplementary material for: Identification of Functional Gene Modules Associated With STAT-Mediated Antiviral Responses to White Spot Syndrome Virus in Shrimp
Source: Front Physiol. 2019 Mar 11;10:212. doi: 10.3389/fphys.2019.00212 (PMC6421301; doi:10.3389/fphys.2019.00212)
Supplement: FILE S2 — Candidate modules specially affected by STAT during WSSV infection. [file Data_Sheet_2.ZIP › CMASWs/518.txt]

CL1472.Contig1_All
CL1535.Contig6_All
CL2955.Contig1_All
CL4276.Contig1_All
CL5145.Contig1_All
CL5273.Contig2_All
CL6093.Contig2_All
CL697.Contig2_All
CL86.Contig1_All
Unigene1032_All
Unigene10790_All
Unigene14835_All
Unigene2281_All
Unigene2344_All
Unigene25859_All
Unigene25923_All
Unigene26792_All
Unigene26946_All
Unigene30466_All
Unigene3162_All
Unigene32327_All
Unigene3628_All
Unigene5764_All
