# Supplementary material for: Identification of Functional Gene Modules Associated With STAT-Mediated Antiviral Responses to White Spot Syndrome Virus in Shrimp
Source: Front Physiol. 2019 Mar 11;10:212. doi: 10.3389/fphys.2019.00212 (PMC6421301; doi:10.3389/fphys.2019.00212)
Supplement: FILE S2 — Candidate modules specially affected by STAT during WSSV infection. [file Data_Sheet_2.ZIP › CMASWs/541.txt]

CL1050.Contig1_All
CL1399.Contig2_All
CL2227.Contig2_All
CL2548.Contig3_All
CL2658.Contig4_All
CL2669.Contig1_All
CL3723.Contig1_All
CL4783.Contig2_All
CL5104.Contig2_All
CL5179.Contig1_All
CL5252.Contig2_All
CL5582.Contig2_All
CL76.Contig4_All
CL76.Contig9_All
CL959.Contig7_All
Unigene10253_All
Unigene10471_All
Unigene14580_All
Unigene17412_All
Unigene18591_All
Unigene20908_All
Unigene23764_All
Unigene26180_All
Unigene29482_All
Unigene29675_All
Unigene2987_All
Unigene33333_All
Unigene3602_All
Unigene41670_All
Unigene42840_All
Unigene43015_All
Unigene44387_All
Unigene44545_All
Unigene45181_All
Unigene45215_All
Unigene46886_All
Unigene48164_All
Unigene6392_All
