# Supplementary material for: Identification of Functional Gene Modules Associated With STAT-Mediated Antiviral Responses to White Spot Syndrome Virus in Shrimp
Source: Front Physiol. 2019 Mar 11;10:212. doi: 10.3389/fphys.2019.00212 (PMC6421301; doi:10.3389/fphys.2019.00212)
Supplement: FILE S2 — Candidate modules specially affected by STAT during WSSV infection. [file Data_Sheet_2.ZIP › CMASWs/554.txt]

CL1008.Contig4_All
CL2386.Contig2_All
CL3153.Contig5_All
CL4851.Contig2_All
CL4930.Contig1_All
CL4975.Contig2_All
CL498.Contig3_All
CL527.Contig6_All
CL5535.Contig2_All
CL909.Contig6_All
Unigene12800_All
Unigene13509_All
Unigene17630_All
Unigene18854_All
Unigene21522_All
Unigene21809_All
Unigene29343_All
Unigene32959_All
Unigene33508_All
Unigene37024_All
Unigene38216_All
Unigene39330_All
Unigene43875_All
Unigene47203_All
Unigene47497_All
Unigene48067_All
