# Supplementary material for: Identification of Functional Gene Modules Associated With STAT-Mediated Antiviral Responses to White Spot Syndrome Virus in Shrimp
Source: Front Physiol. 2019 Mar 11;10:212. doi: 10.3389/fphys.2019.00212 (PMC6421301; doi:10.3389/fphys.2019.00212)
Supplement: FILE S2 — Candidate modules specially affected by STAT during WSSV infection. [file Data_Sheet_2.ZIP › CMASWs/558.txt]

CL1205.Contig5_All
CL1449.Contig1_All
CL1627.Contig1_All
CL184.Contig1_All
CL2069.Contig1_All
CL2701.Contig1_All
CL277.Contig3_All
CL3266.Contig2_All
CL337.Contig1_All
CL3759.Contig1_All
CL4184.Contig2_All
CL4388.Contig1_All
CL4668.Contig2_All
CL5566.Contig2_All
CL5626.Contig1_All
Unigene10478_All
Unigene14552_All
Unigene15118_All
Unigene17460_All
Unigene24616_All
Unigene33194_All
Unigene36198_All
Unigene36578_All
Unigene37154_All
Unigene3812_All
Unigene40816_All
Unigene45609_All
Unigene47033_All
Unigene47504_All
Unigene48431_All
Unigene513_All
Unigene7323_All
