# Supplementary material for: Identification of Functional Gene Modules Associated With STAT-Mediated Antiviral Responses to White Spot Syndrome Virus in Shrimp
Source: Front Physiol. 2019 Mar 11;10:212. doi: 10.3389/fphys.2019.00212 (PMC6421301; doi:10.3389/fphys.2019.00212)
Supplement: FILE S2 — Candidate modules specially affected by STAT during WSSV infection. [file Data_Sheet_2.ZIP › CMASWs/570.txt]

CL1190.Contig5_All
CL1664.Contig1_All
CL2258.Contig2_All
CL2289.Contig1_All
CL2421.Contig3_All
CL3242.Contig1_All
CL3485.Contig2_All
CL3613.Contig1_All
CL3613.Contig4_All
CL3654.Contig2_All
CL3711.Contig2_All
CL3722.Contig4_All
CL4059.Contig1_All
CL4709.Contig2_All
CL4916.Contig1_All
CL4921.Contig3_All
CL6134.Contig1_All
CL952.Contig3_All
Unigene10654_All
Unigene12531_All
Unigene12851_All
Unigene13582_All
Unigene14940_All
Unigene18054_All
Unigene18443_All
Unigene20227_All
Unigene21981_All
Unigene24645_All
Unigene26598_All
Unigene26744_All
Unigene29221_All
Unigene31721_All
Unigene31853_All
Unigene34570_All
Unigene35440_All
Unigene36471_All
Unigene36791_All
Unigene38248_All
Unigene42904_All
Unigene42932_All
Unigene48471_All
Unigene5287_All
Unigene8337_All
