# Supplementary material for: Identification of Functional Gene Modules Associated With STAT-Mediated Antiviral Responses to White Spot Syndrome Virus in Shrimp
Source: Front Physiol. 2019 Mar 11;10:212. doi: 10.3389/fphys.2019.00212 (PMC6421301; doi:10.3389/fphys.2019.00212)
Supplement: FILE S2 — Candidate modules specially affected by STAT during WSSV infection. [file Data_Sheet_2.ZIP › CMASWs/574.txt]

CL1120.Contig3_All
CL1851.Contig5_All
CL1859.Contig2_All
CL2518.Contig2_All
CL299.Contig6_All
CL387.Contig2_All
CL398.Contig17_All
CL4795.Contig1_All
Unigene12864_All
Unigene16702_All
Unigene1708_All
Unigene17500_All
Unigene18251_All
Unigene21400_All
Unigene21415_All
Unigene241_All
Unigene24951_All
Unigene25781_All
Unigene25855_All
Unigene28373_All
Unigene29239_All
Unigene29783_All
Unigene31392_All
Unigene31647_All
Unigene32932_All
Unigene35106_All
Unigene36241_All
Unigene38487_All
Unigene42011_All
Unigene44295_All
Unigene6633_All
Unigene6764_All
Unigene9028_All
