# Supplementary material for: Identification of Functional Gene Modules Associated With STAT-Mediated Antiviral Responses to White Spot Syndrome Virus in Shrimp
Source: Front Physiol. 2019 Mar 11;10:212. doi: 10.3389/fphys.2019.00212 (PMC6421301; doi:10.3389/fphys.2019.00212)
Supplement: FILE S2 — Candidate modules specially affected by STAT during WSSV infection. [file Data_Sheet_2.ZIP › CMASWs/575.txt]

CL1370.Contig2_All
CL1834.Contig1_All
CL21.Contig4_All
CL3200.Contig2_All
CL3242.Contig1_All
CL3456.Contig1_All
CL3993.Contig1_All
CL4370.Contig1_All
CL5193.Contig1_All
CL5212.Contig1_All
CL6050.Contig1_All
Unigene10939_All
Unigene12531_All
Unigene13168_All
Unigene14766_All
Unigene18455_All
Unigene21948_All
Unigene25203_All
Unigene25878_All
Unigene28307_All
Unigene29297_All
Unigene36292_All
Unigene40670_All
Unigene43235_All
Unigene45064_All
Unigene49728_All
