# Supplementary material for: Identification of Functional Gene Modules Associated With STAT-Mediated Antiviral Responses to White Spot Syndrome Virus in Shrimp
Source: Front Physiol. 2019 Mar 11;10:212. doi: 10.3389/fphys.2019.00212 (PMC6421301; doi:10.3389/fphys.2019.00212)
Supplement: FILE S2 — Candidate modules specially affected by STAT during WSSV infection. [file Data_Sheet_2.ZIP › CMASWs/581.txt]

CL1006.Contig11_All
CL1190.Contig2_All
CL1571.Contig1_All
CL1972.Contig2_All
CL2103.Contig1_All
CL2532.Contig1_All
CL301.Contig2_All
CL3074.Contig5_All
CL322.Contig8_All
CL37.Contig8_All
CL3733.Contig3_All
CL398.Contig9_All
CL4359.Contig1_All
CL4930.Contig1_All
CL4975.Contig2_All
CL498.Contig3_All
CL5078.Contig3_All
CL5082.Contig2_All
CL527.Contig6_All
CL5499.Contig2_All
CL6252.Contig2_All
Unigene12800_All
Unigene13509_All
Unigene21033_All
Unigene21522_All
Unigene21953_All
Unigene22295_All
Unigene22443_All
Unigene24227_All
Unigene25811_All
Unigene29875_All
Unigene37024_All
Unigene38216_All
Unigene43875_All
Unigene46547_All
Unigene48067_All
Unigene49041_All
Unigene6685_All
