# Supplementary material for: Identification of Functional Gene Modules Associated With STAT-Mediated Antiviral Responses to White Spot Syndrome Virus in Shrimp
Source: Front Physiol. 2019 Mar 11;10:212. doi: 10.3389/fphys.2019.00212 (PMC6421301; doi:10.3389/fphys.2019.00212)
Supplement: FILE S2 — Candidate modules specially affected by STAT during WSSV infection. [file Data_Sheet_2.ZIP › CMASWs/582.txt]

CL1.Contig1_All
CL1385.Contig2_All
CL1417.Contig1_All
CL2081.Contig1_All
CL2170.Contig3_All
CL2374.Contig1_All
CL2584.Contig2_All
CL3130.Contig3_All
CL3450.Contig2_All
CL3570.Contig1_All
CL4719.Contig1_All
CL5564.Contig2_All
CL571.Contig1_All
CL6089.Contig3_All
CL6241.Contig8_All
CL686.Contig10_All
CL765.Contig5_All
CL802.Contig1_All
Unigene1183_All
Unigene16896_All
Unigene17808_All
Unigene21525_All
Unigene25003_All
Unigene2884_All
Unigene29544_All
Unigene32093_All
Unigene32136_All
Unigene3291_All
Unigene35588_All
Unigene38832_All
Unigene39150_All
Unigene41353_All
Unigene43938_All
Unigene44022_All
Unigene44414_All
Unigene4559_All
Unigene46689_All
Unigene47886_All
Unigene48531_All
Unigene5466_All
Unigene5965_All
