# Supplementary material for: Identification of Functional Gene Modules Associated With STAT-Mediated Antiviral Responses to White Spot Syndrome Virus in Shrimp
Source: Front Physiol. 2019 Mar 11;10:212. doi: 10.3389/fphys.2019.00212 (PMC6421301; doi:10.3389/fphys.2019.00212)
Supplement: FILE S2 — Candidate modules specially affected by STAT during WSSV infection. [file Data_Sheet_2.ZIP › CMASWs/600.txt]

CL1278.Contig2_All
CL1569.Contig3_All
CL1584.Contig13_All
CL1605.Contig5_All
CL2175.Contig1_All
Unigene13334_All
Unigene16652_All
Unigene16895_All
Unigene22169_All
Unigene24810_All
Unigene25447_All
Unigene44900_All
Unigene47396_All
Unigene48424_All
Unigene48782_All
Unigene5520_All
Unigene9253_All
Unigene9348_All
