# Supplementary material for: Identification of Functional Gene Modules Associated With STAT-Mediated Antiviral Responses to White Spot Syndrome Virus in Shrimp
Source: Front Physiol. 2019 Mar 11;10:212. doi: 10.3389/fphys.2019.00212 (PMC6421301; doi:10.3389/fphys.2019.00212)
Supplement: FILE S2 — Candidate modules specially affected by STAT during WSSV infection. [file Data_Sheet_2.ZIP › CMASWs/616.txt]

CL1267.Contig2_All
CL1448.Contig2_All
CL1449.Contig2_All
CL1517.Contig1_All
CL1848.Contig7_All
CL2033.Contig2_All
CL213.Contig2_All
CL2139.Contig9_All
CL2167.Contig4_All
CL2170.Contig3_All
CL2584.Contig2_All
CL3101.Contig3_All
CL3123.Contig6_All
CL3616.Contig1_All
CL4719.Contig1_All
CL5492.Contig1_All
CL5564.Contig2_All
CL6089.Contig3_All
Unigene10189_All
Unigene16896_All
Unigene17805_All
Unigene22089_All
Unigene25003_All
Unigene27995_All
Unigene31236_All
Unigene32136_All
Unigene3291_All
Unigene33002_All
Unigene3602_All
Unigene36382_All
Unigene41539_All
Unigene44022_All
Unigene44414_All
Unigene45269_All
Unigene46767_All
Unigene47886_All
Unigene48531_All
Unigene5965_All
Unigene6437_All
Unigene888_All
