# Supplementary material for: Identification of Functional Gene Modules Associated With STAT-Mediated Antiviral Responses to White Spot Syndrome Virus in Shrimp
Source: Front Physiol. 2019 Mar 11;10:212. doi: 10.3389/fphys.2019.00212 (PMC6421301; doi:10.3389/fphys.2019.00212)
Supplement: FILE S2 — Candidate modules specially affected by STAT during WSSV infection. [file Data_Sheet_2.ZIP › CMASWs/619.txt]

CL1195.Contig2_All
CL133.Contig4_All
CL2669.Contig1_All
CL2958.Contig1_All
CL343.Contig2_All
CL3601.Contig2_All
CL5350.Contig1_All
CL5441.Contig2_All
CL758.Contig2_All
CL883.Contig3_All
Unigene11419_All
Unigene12725_All
Unigene14111_All
Unigene15788_All
Unigene18805_All
Unigene20137_All
Unigene23491_All
Unigene23896_All
Unigene24125_All
Unigene25004_All
Unigene27915_All
Unigene28701_All
Unigene29208_All
Unigene29533_All
Unigene29549_All
Unigene32190_All
Unigene33203_All
Unigene35934_All
Unigene36886_All
Unigene42063_All
Unigene42905_All
Unigene43300_All
Unigene43798_All
Unigene45299_All
Unigene48047_All
Unigene49602_All
Unigene5072_All
Unigene8260_All
