# Supplementary material for: Identification of Functional Gene Modules Associated With STAT-Mediated Antiviral Responses to White Spot Syndrome Virus in Shrimp
Source: Front Physiol. 2019 Mar 11;10:212. doi: 10.3389/fphys.2019.00212 (PMC6421301; doi:10.3389/fphys.2019.00212)
Supplement: FILE S2 — Candidate modules specially affected by STAT during WSSV infection. [file Data_Sheet_2.ZIP › CMASWs/638.txt]

CL1180.Contig1_All
CL1251.Contig2_All
CL1815.Contig2_All
CL2345.Contig2_All
CL237.Contig1_All
CL2685.Contig3_All
CL2761.Contig3_All
CL3050.Contig1_All
CL3239.Contig3_All
CL3548.Contig4_All
CL3821.Contig1_All
CL3852.Contig1_All
CL4277.Contig3_All
CL4772.Contig3_All
CL5187.Contig1_All
CL5283.Contig1_All
CL5344.Contig2_All
CL5495.Contig2_All
CL5841.Contig1_All
CL6354.Contig2_All
Unigene10156_All
Unigene13518_All
Unigene13720_All
Unigene17474_All
Unigene18174_All
Unigene21336_All
Unigene22054_All
Unigene24657_All
Unigene25566_All
Unigene2588_All
Unigene2828_All
Unigene30501_All
Unigene3229_All
Unigene33407_All
Unigene3366_All
Unigene3548_All
Unigene36249_All
Unigene37595_All
Unigene39382_All
Unigene40311_All
Unigene40816_All
Unigene41815_All
Unigene44835_All
Unigene46451_All
Unigene46827_All
Unigene47061_All
Unigene47079_All
Unigene48105_All
Unigene48484_All
Unigene48809_All
Unigene49971_All
Unigene50180_All
Unigene6093_All
