# Supplementary material for: Identification of Functional Gene Modules Associated With STAT-Mediated Antiviral Responses to White Spot Syndrome Virus in Shrimp
Source: Front Physiol. 2019 Mar 11;10:212. doi: 10.3389/fphys.2019.00212 (PMC6421301; doi:10.3389/fphys.2019.00212)
Supplement: FILE S2 — Candidate modules specially affected by STAT during WSSV infection. [file Data_Sheet_2.ZIP › CMASWs/648.txt]

CL120.Contig73_All
CL2842.Contig4_All
CL3601.Contig1_All
CL4135.Contig8_All
CL4186.Contig1_All
CL4623.Contig2_All
CL4771.Contig2_All
Unigene10556_All
Unigene10918_All
Unigene16857_All
Unigene20117_All
Unigene2280_All
Unigene23821_All
Unigene24127_All
Unigene25918_All
Unigene34326_All
Unigene38111_All
Unigene38670_All
Unigene41711_All
Unigene42931_All
Unigene44116_All
Unigene44430_All
Unigene47086_All
Unigene47813_All
Unigene50036_All
