# Supplementary material for: Identification of Functional Gene Modules Associated With STAT-Mediated Antiviral Responses to White Spot Syndrome Virus in Shrimp
Source: Front Physiol. 2019 Mar 11;10:212. doi: 10.3389/fphys.2019.00212 (PMC6421301; doi:10.3389/fphys.2019.00212)
Supplement: FILE S2 — Candidate modules specially affected by STAT during WSSV infection. [file Data_Sheet_2.ZIP › CMASWs/659.txt]

CL1105.Contig2_All
CL1735.Contig1_All
CL3516.Contig1_All
CL3532.Contig2_All
CL3704.Contig2_All
CL4133.Contig2_All
CL4786.Contig3_All
CL527.Contig9_All
CL5362.Contig4_All
CL670.Contig1_All
Unigene12399_All
Unigene14308_All
Unigene17791_All
Unigene20769_All
Unigene21958_All
Unigene2304_All
Unigene24048_All
Unigene24166_All
Unigene25520_All
Unigene25846_All
Unigene28910_All
Unigene30719_All
Unigene31966_All
Unigene32058_All
Unigene3449_All
Unigene35023_All
Unigene36407_All
Unigene36469_All
Unigene39884_All
Unigene40385_All
Unigene9745_All
