# Supplementary material for: Identification of Functional Gene Modules Associated With STAT-Mediated Antiviral Responses to White Spot Syndrome Virus in Shrimp
Source: Front Physiol. 2019 Mar 11;10:212. doi: 10.3389/fphys.2019.00212 (PMC6421301; doi:10.3389/fphys.2019.00212)
Supplement: FILE S2 — Candidate modules specially affected by STAT during WSSV infection. [file Data_Sheet_2.ZIP › CMASWs/695.txt]

CL2147.Contig2_All
CL4387.Contig2_All
CL86.Contig10_All
CL86.Contig11_All
CL86.Contig12_All
CL86.Contig9_All
Unigene10443_All
Unigene12288_All
Unigene16562_All
Unigene18062_All
Unigene20433_All
Unigene21324_All
Unigene23660_All
Unigene2844_All
Unigene32135_All
Unigene32677_All
Unigene33002_All
Unigene33044_All
Unigene3859_All
Unigene38841_All
Unigene43145_All
Unigene47253_All
Unigene49150_All
Unigene5982_All
Unigene9422_All
