# Supplementary material for: Identification of Functional Gene Modules Associated With STAT-Mediated Antiviral Responses to White Spot Syndrome Virus in Shrimp
Source: Front Physiol. 2019 Mar 11;10:212. doi: 10.3389/fphys.2019.00212 (PMC6421301; doi:10.3389/fphys.2019.00212)
Supplement: FILE S2 — Candidate modules specially affected by STAT during WSSV infection. [file Data_Sheet_2.ZIP › CMASWs/704.txt]

CL1074.Contig1_All
CL1713.Contig1_All
CL1830.Contig1_All
CL2433.Contig5_All
CL2665.Contig1_All
CL3221.Contig2_All
CL3394.Contig1_All
CL3394.Contig3_All
CL3529.Contig2_All
CL353.Contig3_All
CL3561.Contig1_All
CL3671.Contig2_All
CL4406.Contig2_All
CL4623.Contig2_All
CL4702.Contig2_All
CL5231.Contig2_All
CL5613.Contig2_All
CL5719.Contig1_All
CL6048.Contig1_All
CL771.Contig2_All
CL878.Contig1_All
CL97.Contig30_All
Unigene10397_All
Unigene1054_All
Unigene10660_All
Unigene10852_All
Unigene12551_All
Unigene13797_All
Unigene1464_All
Unigene1488_All
Unigene17144_All
Unigene17274_All
Unigene17665_All
Unigene18172_All
Unigene19393_All
Unigene20535_All
Unigene20713_All
Unigene21441_All
Unigene21716_All
Unigene22014_All
Unigene22174_All
Unigene24960_All
Unigene28771_All
Unigene29300_All
Unigene29339_All
Unigene31474_All
Unigene31920_All
Unigene32189_All
Unigene33996_All
Unigene34139_All
Unigene35018_All
Unigene36379_All
Unigene36536_All
Unigene36545_All
Unigene36755_All
Unigene3831_All
Unigene4031_All
Unigene40436_All
Unigene44581_All
Unigene46210_All
Unigene46575_All
Unigene47272_All
Unigene48804_All
Unigene49642_All
Unigene49680_All
Unigene5457_All
Unigene6441_All
Unigene7448_All
Unigene7721_All
Unigene8053_All
Unigene8176_All
Unigene9235_All
