# Supplementary material for: Identification of Functional Gene Modules Associated With STAT-Mediated Antiviral Responses to White Spot Syndrome Virus in Shrimp
Source: Front Physiol. 2019 Mar 11;10:212. doi: 10.3389/fphys.2019.00212 (PMC6421301; doi:10.3389/fphys.2019.00212)
Supplement: FILE S2 — Candidate modules specially affected by STAT during WSSV infection. [file Data_Sheet_2.ZIP › CMASWs/705.txt]

CL1064.Contig1_All
CL11.Contig2_All
CL1174.Contig3_All
CL1596.Contig1_All
CL1651.Contig1_All
CL189.Contig4_All
CL2168.Contig1_All
CL2227.Contig2_All
CL2233.Contig2_All
CL23.Contig8_All
CL2900.Contig5_All
CL2916.Contig2_All
CL3140.Contig5_All
CL3512.Contig1_All
CL3593.Contig1_All
CL3723.Contig1_All
CL4668.Contig1_All
CL4668.Contig3_All
CL478.Contig2_All
CL4830.Contig3_All
CL6280.Contig5_All
CL837.Contig1_All
Unigene10063_All
Unigene10304_All
Unigene1045_All
Unigene13233_All
Unigene13784_All
Unigene14104_All
Unigene14318_All
Unigene14581_All
Unigene15009_All
Unigene17566_All
Unigene18540_All
Unigene19719_All
Unigene22211_All
Unigene2441_All
Unigene25110_All
Unigene25137_All
Unigene25529_All
Unigene25594_All
Unigene26048_All
Unigene2810_All
Unigene28412_All
Unigene28559_All
Unigene28683_All
Unigene29170_All
Unigene29396_All
Unigene3026_All
Unigene3056_All
Unigene30961_All
Unigene32340_All
Unigene32414_All
Unigene33460_All
Unigene3602_All
Unigene36095_All
Unigene38352_All
Unigene39812_All
Unigene41360_All
Unigene42081_All
Unigene45181_All
Unigene45215_All
Unigene46301_All
Unigene46601_All
Unigene46638_All
Unigene46886_All
Unigene47253_All
Unigene47813_All
Unigene48164_All
Unigene48252_All
Unigene49595_All
Unigene50126_All
Unigene8663_All
