# Supplementary material for: Identification of Functional Gene Modules Associated With STAT-Mediated Antiviral Responses to White Spot Syndrome Virus in Shrimp
Source: Front Physiol. 2019 Mar 11;10:212. doi: 10.3389/fphys.2019.00212 (PMC6421301; doi:10.3389/fphys.2019.00212)
Supplement: FILE S2 — Candidate modules specially affected by STAT during WSSV infection. [file Data_Sheet_2.ZIP › CMASWs/718.txt]

CL1128.Contig2_All
CL1190.Contig20_All
CL1280.Contig4_All
CL156.Contig3_All
CL1653.Contig4_All
CL2421.Contig1_All
CL3533.Contig1_All
CL3855.Contig3_All
CL4199.Contig2_All
CL4575.Contig1_All
CL4751.Contig1_All
CL599.Contig1_All
CL656.Contig3_All
CL656.Contig5_All
Unigene14278_All
Unigene17007_All
Unigene18482_All
Unigene1900_All
Unigene22532_All
Unigene24097_All
Unigene24193_All
Unigene27678_All
Unigene28332_All
Unigene3125_All
Unigene34594_All
Unigene35383_All
Unigene36678_All
Unigene37005_All
Unigene40758_All
Unigene41230_All
Unigene42312_All
Unigene47089_All
Unigene48804_All
Unigene6947_All
Unigene7278_All
