# Supplementary material for: Identification of Functional Gene Modules Associated With STAT-Mediated Antiviral Responses to White Spot Syndrome Virus in Shrimp
Source: Front Physiol. 2019 Mar 11;10:212. doi: 10.3389/fphys.2019.00212 (PMC6421301; doi:10.3389/fphys.2019.00212)
Supplement: FILE S2 — Candidate modules specially affected by STAT during WSSV infection. [file Data_Sheet_2.ZIP › CMASWs/723.txt]

CL1472.Contig1_All
CL1535.Contig6_All
CL1994.Contig1_All
CL2415.Contig4_All
CL3235.Contig2_All
CL3263.Contig1_All
CL3328.Contig2_All
CL3558.Contig2_All
CL4276.Contig1_All
CL5273.Contig2_All
CL5412.Contig2_All
CL5500.Contig1_All
CL708.Contig2_All
CL713.Contig2_All
Unigene11125_All
Unigene16825_All
Unigene18088_All
Unigene20391_All
Unigene23987_All
Unigene24077_All
Unigene24709_All
Unigene27167_All
Unigene29661_All
Unigene33431_All
Unigene3507_All
Unigene35254_All
Unigene49053_All
Unigene5642_All
Unigene7417_All
