# Supplementary material for: Identification of Functional Gene Modules Associated With STAT-Mediated Antiviral Responses to White Spot Syndrome Virus in Shrimp
Source: Front Physiol. 2019 Mar 11;10:212. doi: 10.3389/fphys.2019.00212 (PMC6421301; doi:10.3389/fphys.2019.00212)
Supplement: FILE S2 — Candidate modules specially affected by STAT during WSSV infection. [file Data_Sheet_2.ZIP › CMASWs/759.txt]

CL1290.Contig5_All
CL2666.Contig2_All
Unigene10971_All
Unigene12725_All
Unigene14316_All
Unigene1770_All
Unigene18334_All
Unigene25688_All
Unigene25810_All
Unigene32190_All
Unigene34173_All
Unigene35375_All
Unigene36886_All
Unigene38286_All
Unigene39331_All
Unigene45299_All
Unigene47165_All
Unigene5982_All
Unigene7496_All
Unigene8703_All
Unigene9197_All
