# Supplementary material for: Identification of Functional Gene Modules Associated With STAT-Mediated Antiviral Responses to White Spot Syndrome Virus in Shrimp
Source: Front Physiol. 2019 Mar 11;10:212. doi: 10.3389/fphys.2019.00212 (PMC6421301; doi:10.3389/fphys.2019.00212)
Supplement: FILE S2 — Candidate modules specially affected by STAT during WSSV infection. [file Data_Sheet_2.ZIP › CMASWs/760.txt]

CL1255.Contig7_All
CL1296.Contig7_All
CL161.Contig11_All
CL204.Contig2_All
CL228.Contig1_All
CL2957.Contig1_All
CL3082.Contig1_All
CL3118.Contig2_All
CL3460.Contig1_All
CL3580.Contig2_All
CL4224.Contig2_All
CL4461.Contig1_All
CL4522.Contig2_All
CL4967.Contig1_All
CL5754.Contig2_All
CL6336.Contig2_All
CL670.Contig1_All
CL817.Contig1_All
Unigene10879_All
Unigene12283_All
Unigene13659_All
Unigene13696_All
Unigene15234_All
Unigene16492_All
Unigene16688_All
Unigene17248_All
Unigene17320_All
Unigene18107_All
Unigene18676_All
Unigene19409_All
Unigene20552_All
Unigene21154_All
Unigene22260_All
Unigene24234_All
Unigene27612_All
Unigene2795_All
Unigene31544_All
Unigene32622_All
Unigene34004_All
Unigene34778_All
Unigene35815_All
Unigene36300_All
Unigene36506_All
Unigene38372_All
Unigene43441_All
Unigene44398_All
Unigene44807_All
Unigene45232_All
Unigene45259_All
Unigene45453_All
Unigene47323_All
Unigene4838_All
Unigene49433_All
Unigene6021_All
Unigene6827_All
Unigene9871_All
