# Supplementary material for: Identification of Functional Gene Modules Associated With STAT-Mediated Antiviral Responses to White Spot Syndrome Virus in Shrimp
Source: Front Physiol. 2019 Mar 11;10:212. doi: 10.3389/fphys.2019.00212 (PMC6421301; doi:10.3389/fphys.2019.00212)
Supplement: FILE S2 — Candidate modules specially affected by STAT during WSSV infection. [file Data_Sheet_2.ZIP › CMASWs/763.txt]

CL1062.Contig4_All
CL1723.Contig1_All
CL1834.Contig1_All
CL2002.Contig2_All
CL2535.Contig1_All
CL2620.Contig1_All
CL2978.Contig1_All
CL312.Contig1_All
CL3182.Contig1_All
CL3696.Contig1_All
CL3993.Contig1_All
CL4233.Contig3_All
CL4370.Contig1_All
CL5193.Contig1_All
CL5212.Contig1_All
CL6314.Contig1_All
Unigene10673_All
Unigene11070_All
Unigene13168_All
Unigene13653_All
Unigene13680_All
Unigene16735_All
Unigene18455_All
Unigene21487_All
Unigene21948_All
Unigene25203_All
Unigene25234_All
Unigene28307_All
Unigene29297_All
Unigene31083_All
Unigene38891_All
Unigene39221_All
Unigene40670_All
Unigene40812_All
Unigene43235_All
Unigene44580_All
Unigene45064_All
Unigene6831_All
Unigene7227_All
Unigene9433_All
