# Supplementary material for: Identification of Functional Gene Modules Associated With STAT-Mediated Antiviral Responses to White Spot Syndrome Virus in Shrimp
Source: Front Physiol. 2019 Mar 11;10:212. doi: 10.3389/fphys.2019.00212 (PMC6421301; doi:10.3389/fphys.2019.00212)
Supplement: FILE S2 — Candidate modules specially affected by STAT during WSSV infection. [file Data_Sheet_2.ZIP › CMASWs/769.txt]

CL105.Contig2_All
CL1190.Contig6_All
CL2344.Contig2_All
CL2504.Contig1_All
CL2658.Contig5_All
CL307.Contig3_All
CL3453.Contig2_All
CL5052.Contig2_All
CL756.Contig2_All
Unigene10109_All
Unigene10722_All
Unigene1301_All
Unigene14502_All
Unigene16032_All
Unigene23536_All
Unigene27541_All
Unigene32664_All
Unigene3452_All
Unigene35027_All
Unigene35696_All
Unigene36818_All
Unigene38337_All
Unigene38631_All
Unigene40594_All
Unigene42189_All
Unigene42792_All
Unigene43774_All
Unigene46477_All
