# Supplementary material for: Identification of Functional Gene Modules Associated With STAT-Mediated Antiviral Responses to White Spot Syndrome Virus in Shrimp
Source: Front Physiol. 2019 Mar 11;10:212. doi: 10.3389/fphys.2019.00212 (PMC6421301; doi:10.3389/fphys.2019.00212)
Supplement: FILE S2 — Candidate modules specially affected by STAT during WSSV infection. [file Data_Sheet_2.ZIP › CMASWs/773.txt]

CL1399.Contig2_All
CL2293.Contig2_All
CL3399.Contig2_All
CL3812.Contig1_All
CL5685.Contig1_All
CL5788.Contig2_All
CL6160.Contig2_All
CL85.Contig15_All
Unigene10947_All
Unigene14580_All
Unigene16836_All
Unigene19899_All
Unigene24120_All
Unigene32647_All
Unigene38620_All
Unigene40985_All
Unigene44545_All
Unigene46185_All
Unigene48119_All
Unigene48239_All
Unigene49693_All
Unigene6613_All
Unigene7254_All
