# Supplementary material for: Identification of Functional Gene Modules Associated With STAT-Mediated Antiviral Responses to White Spot Syndrome Virus in Shrimp
Source: Front Physiol. 2019 Mar 11;10:212. doi: 10.3389/fphys.2019.00212 (PMC6421301; doi:10.3389/fphys.2019.00212)
Supplement: FILE S2 — Candidate modules specially affected by STAT during WSSV infection. [file Data_Sheet_2.ZIP › CMASWs/777.txt]

CL1251.Contig2_All
CL1640.Contig1_All
CL2344.Contig2_All
CL3050.Contig1_All
CL3453.Contig2_All
CL5212.Contig1_All
CL5351.Contig2_All
CL5600.Contig2_All
CL5786.Contig3_All
CL6354.Contig2_All
CL676.Contig2_All
CL857.Contig2_All
Unigene10576_All
Unigene12601_All
Unigene13885_All
Unigene14502_All
Unigene1866_All
Unigene2388_All
Unigene25752_All
Unigene26042_All
Unigene28450_All
Unigene30753_All
Unigene32990_All
Unigene35369_All
Unigene3548_All
Unigene35696_All
Unigene3781_All
Unigene38233_All
Unigene38631_All
Unigene39229_All
Unigene42659_All
Unigene42782_All
Unigene44553_All
Unigene44841_All
Unigene49421_All
Unigene7528_All
Unigene8752_All
