# Supplementary material for: Identification of Functional Gene Modules Associated With STAT-Mediated Antiviral Responses to White Spot Syndrome Virus in Shrimp
Source: Front Physiol. 2019 Mar 11;10:212. doi: 10.3389/fphys.2019.00212 (PMC6421301; doi:10.3389/fphys.2019.00212)
Supplement: FILE S2 — Candidate modules specially affected by STAT during WSSV infection. [file Data_Sheet_2.ZIP › CMASWs/784.txt]

CL1338.Contig9_All
CL1740.Contig1_All
CL2052.Contig2_All
CL207.Contig27_All
CL2406.Contig1_All
CL3061.Contig2_All
CL4653.Contig1_All
CL4881.Contig2_All
CL5860.Contig1_All
CL5916.Contig2_All
CL676.Contig4_All
Unigene11656_All
Unigene13617_All
Unigene13984_All
Unigene15917_All
Unigene18282_All
Unigene18438_All
Unigene22150_All
Unigene28964_All
Unigene29332_All
Unigene31915_All
Unigene32161_All
Unigene32697_All
Unigene33300_All
Unigene35731_All
Unigene36149_All
Unigene3905_All
Unigene40509_All
Unigene41674_All
Unigene47625_All
Unigene7019_All
Unigene99_All
