# Supplementary material for: Identification of Functional Gene Modules Associated With STAT-Mediated Antiviral Responses to White Spot Syndrome Virus in Shrimp
Source: Front Physiol. 2019 Mar 11;10:212. doi: 10.3389/fphys.2019.00212 (PMC6421301; doi:10.3389/fphys.2019.00212)
Supplement: FILE S2 — Candidate modules specially affected by STAT during WSSV infection. [file Data_Sheet_2.ZIP › CMASWs/791.txt]

CL1425.Contig1_All
CL1435.Contig2_All
CL1976.Contig1_All
CL228.Contig1_All
CL2518.Contig2_All
CL3109.Contig1_All
CL3118.Contig2_All
CL4795.Contig1_All
CL503.Contig1_All
CL5573.Contig2_All
CL5845.Contig2_All
CL5880.Contig2_All
CL6201.Contig1_All
CL88.Contig13_All
Unigene11171_All
Unigene11197_All
Unigene11258_All
Unigene14404_All
Unigene14492_All
Unigene16733_All
Unigene17331_All
Unigene18124_All
Unigene18280_All
Unigene23987_All
Unigene241_All
Unigene24951_All
Unigene28059_All
Unigene31303_All
Unigene31392_All
Unigene36300_All
Unigene36506_All
Unigene37048_All
Unigene40933_All
Unigene41307_All
Unigene42011_All
Unigene42876_All
Unigene44697_All
Unigene49430_All
Unigene980_All
