# Supplementary material for: Identification of Functional Gene Modules Associated With STAT-Mediated Antiviral Responses to White Spot Syndrome Virus in Shrimp
Source: Front Physiol. 2019 Mar 11;10:212. doi: 10.3389/fphys.2019.00212 (PMC6421301; doi:10.3389/fphys.2019.00212)
Supplement: FILE S2 — Candidate modules specially affected by STAT during WSSV infection. [file Data_Sheet_2.ZIP › CMASWs/804.txt]

CL1064.Contig2_All
CL1184.Contig1_All
CL1190.Contig20_All
CL1282.Contig1_All
CL207.Contig29_All
CL225.Contig2_All
CL3283.Contig1_All
CL3305.Contig2_All
CL370.Contig4_All
CL529.Contig2_All
CL587.Contig2_All
CL6039.Contig2_All
CL758.Contig1_All
CL763.Contig4_All
Unigene12817_All
Unigene18747_All
Unigene20685_All
Unigene26038_All
Unigene28888_All
Unigene29641_All
Unigene31453_All
Unigene32363_All
Unigene35707_All
Unigene39150_All
Unigene43784_All
Unigene48427_All
Unigene50068_All
Unigene6786_All
