# Supplementary material for: Identification of Functional Gene Modules Associated With STAT-Mediated Antiviral Responses to White Spot Syndrome Virus in Shrimp
Source: Front Physiol. 2019 Mar 11;10:212. doi: 10.3389/fphys.2019.00212 (PMC6421301; doi:10.3389/fphys.2019.00212)
Supplement: FILE S2 — Candidate modules specially affected by STAT during WSSV infection. [file Data_Sheet_2.ZIP › CMASWs/805.txt]

CL193.Contig2_All
CL1999.Contig1_All
CL2093.Contig3_All
CL2147.Contig2_All
CL228.Contig2_All
CL3136.Contig1_All
CL3190.Contig1_All
CL3713.Contig1_All
CL4778.Contig1_All
CL5172.Contig2_All
CL5432.Contig1_All
CL86.Contig9_All
Unigene10918_All
Unigene12628_All
Unigene1267_All
Unigene13016_All
Unigene13606_All
Unigene18280_All
Unigene18562_All
Unigene24127_All
Unigene27784_All
Unigene2844_All
Unigene29720_All
Unigene33044_All
Unigene36043_All
Unigene36763_All
Unigene3770_All
Unigene44430_All
Unigene44697_All
Unigene45818_All
Unigene48926_All
Unigene50069_All
