# Supplementary material for: Identification of Functional Gene Modules Associated With STAT-Mediated Antiviral Responses to White Spot Syndrome Virus in Shrimp
Source: Front Physiol. 2019 Mar 11;10:212. doi: 10.3389/fphys.2019.00212 (PMC6421301; doi:10.3389/fphys.2019.00212)
Supplement: FILE S2 — Candidate modules specially affected by STAT during WSSV infection. [file Data_Sheet_2.ZIP › CMASWs/809.txt]

CL1550.Contig1_All
CL1735.Contig3_All
CL2903.Contig1_All
CL4116.Contig3_All
CL4641.Contig2_All
CL4830.Contig2_All
CL5095.Contig1_All
CL5130.Contig2_All
CL565.Contig1_All
CL586.Contig3_All
Unigene11308_All
Unigene13720_All
Unigene18051_All
Unigene18145_All
Unigene20296_All
Unigene25318_All
Unigene26203_All
Unigene2916_All
Unigene35058_All
Unigene35745_All
Unigene39224_All
Unigene39850_All
Unigene42660_All
Unigene48826_All
