# Supplementary material for: Identification of Functional Gene Modules Associated With STAT-Mediated Antiviral Responses to White Spot Syndrome Virus in Shrimp
Source: Front Physiol. 2019 Mar 11;10:212. doi: 10.3389/fphys.2019.00212 (PMC6421301; doi:10.3389/fphys.2019.00212)
Supplement: FILE S2 — Candidate modules specially affected by STAT during WSSV infection. [file Data_Sheet_2.ZIP › CMASWs/816.txt]

CL2167.Contig4_All
CL2958.Contig1_All
CL37.Contig25_All
CL5685.Contig1_All
CL6122.Contig1_All
CL76.Contig4_All
CL76.Contig9_All
CL85.Contig15_All
Unigene1888_All
Unigene20908_All
Unigene22089_All
Unigene22694_All
Unigene28805_All
Unigene29482_All
Unigene3602_All
Unigene37059_All
Unigene43015_All
Unigene44545_All
Unigene46185_All
Unigene46698_All
Unigene48164_All
Unigene49693_All
Unigene6392_All
Unigene7128_All
Unigene7254_All
