# Supplementary material for: Identification of Functional Gene Modules Associated With STAT-Mediated Antiviral Responses to White Spot Syndrome Virus in Shrimp
Source: Front Physiol. 2019 Mar 11;10:212. doi: 10.3389/fphys.2019.00212 (PMC6421301; doi:10.3389/fphys.2019.00212)
Supplement: FILE S2 — Candidate modules specially affected by STAT during WSSV infection. [file Data_Sheet_2.ZIP › CMASWs/825.txt]

CL1023.Contig2_All
CL1117.Contig1_All
CL1468.Contig5_All
CL161.Contig32_All
CL2202.Contig1_All
CL2518.Contig2_All
CL2825.Contig1_All
CL3074.Contig6_All
CL3778.Contig1_All
CL4002.Contig2_All
CL4755.Contig2_All
CL4795.Contig1_All
CL5113.Contig1_All
CL5476.Contig1_All
Unigene10032_All
Unigene11101_All
Unigene12986_All
Unigene15413_All
Unigene16524_All
Unigene16702_All
Unigene17211_All
Unigene1755_All
Unigene17650_All
Unigene18351_All
Unigene20518_All
Unigene23988_All
Unigene2401_All
Unigene241_All
Unigene25030_All
Unigene25644_All
Unigene26016_All
Unigene29239_All
Unigene31392_All
Unigene32866_All
Unigene33210_All
Unigene35393_All
Unigene41308_All
Unigene42011_All
Unigene42600_All
Unigene44252_All
Unigene44672_All
Unigene45619_All
Unigene49521_All
Unigene6633_All
Unigene9437_All
