# Supplementary material for: Identification of Functional Gene Modules Associated With STAT-Mediated Antiviral Responses to White Spot Syndrome Virus in Shrimp
Source: Front Physiol. 2019 Mar 11;10:212. doi: 10.3389/fphys.2019.00212 (PMC6421301; doi:10.3389/fphys.2019.00212)
Supplement: FILE S2 — Candidate modules specially affected by STAT during WSSV infection. [file Data_Sheet_2.ZIP › CMASWs/833.txt]

CL1034.Contig2_All
CL1143.Contig2_All
CL1157.Contig2_All
CL1569.Contig1_All
CL1973.Contig1_All
CL2040.Contig1_All
CL2528.Contig2_All
CL2761.Contig4_All
CL2965.Contig2_All
CL3089.Contig1_All
CL3285.Contig2_All
CL3927.Contig2_All
CL4507.Contig1_All
CL4659.Contig2_All
CL5498.Contig1_All
CL5612.Contig2_All
CL5788.Contig1_All
CL637.Contig3_All
CL681.Contig1_All
Unigene10431_All
Unigene10572_All
Unigene13484_All
Unigene14535_All
Unigene14788_All
Unigene17898_All
Unigene18689_All
Unigene1985_All
Unigene22312_All
Unigene2507_All
Unigene25312_All
Unigene29619_All
Unigene29875_All
Unigene31430_All
Unigene32130_All
Unigene33732_All
Unigene3568_All
Unigene36398_All
Unigene41833_All
Unigene44251_All
Unigene44922_All
Unigene46527_All
Unigene47250_All
Unigene6135_All
Unigene6_All
Unigene9664_All
