# Supplementary material for: Identification of Functional Gene Modules Associated With STAT-Mediated Antiviral Responses to White Spot Syndrome Virus in Shrimp
Source: Front Physiol. 2019 Mar 11;10:212. doi: 10.3389/fphys.2019.00212 (PMC6421301; doi:10.3389/fphys.2019.00212)
Supplement: FILE S2 — Candidate modules specially affected by STAT during WSSV infection. [file Data_Sheet_2.ZIP › CMASWs/849.txt]

CL1020.Contig1_All
CL1033.Contig4_All
CL1160.Contig2_All
CL1178.Contig2_All
CL1506.Contig5_All
CL1561.Contig2_All
CL157.Contig1_All
CL161.Contig7_All
CL1674.Contig3_All
CL2519.Contig1_All
CL2571.Contig4_All
CL2995.Contig3_All
CL3212.Contig3_All
CL3290.Contig1_All
CL3328.Contig1_All
CL384.Contig4_All
CL4140.Contig2_All
CL4445.Contig2_All
CL4585.Contig1_All
CL4710.Contig1_All
CL637.Contig5_All
CL799.Contig2_All
CL857.Contig3_All
CL896.Contig2_All
Unigene11070_All
Unigene11470_All
Unigene12626_All
Unigene13653_All
Unigene18446_All
Unigene20179_All
Unigene2041_All
Unigene21267_All
Unigene22840_All
Unigene24704_All
Unigene25913_All
Unigene27409_All
Unigene28621_All
Unigene29551_All
Unigene32621_All
Unigene36037_All
Unigene36515_All
Unigene37230_All
Unigene40432_All
Unigene40812_All
Unigene41243_All
Unigene43654_All
Unigene43771_All
Unigene45716_All
Unigene47357_All
Unigene50007_All
Unigene6864_All
Unigene6993_All
Unigene7305_All
Unigene8437_All
Unigene9302_All
