# Supplementary material for: Identification of Functional Gene Modules Associated With STAT-Mediated Antiviral Responses to White Spot Syndrome Virus in Shrimp
Source: Front Physiol. 2019 Mar 11;10:212. doi: 10.3389/fphys.2019.00212 (PMC6421301; doi:10.3389/fphys.2019.00212)
Supplement: FILE S2 — Candidate modules specially affected by STAT during WSSV infection. [file Data_Sheet_2.ZIP › CMASWs/850.txt]

CL1338.Contig9_All
CL1588.Contig2_All
CL1740.Contig1_All
CL207.Contig27_All
CL2411.Contig2_All
CL3005.Contig2_All
CL3189.Contig1_All
CL4653.Contig1_All
CL4877.Contig1_All
CL4881.Contig2_All
CL5573.Contig1_All
CL5860.Contig1_All
CL5916.Contig2_All
Unigene12957_All
Unigene13531_All
Unigene13617_All
Unigene20395_All
Unigene22150_All
Unigene25692_All
Unigene29332_All
Unigene32697_All
Unigene33906_All
Unigene38430_All
Unigene40509_All
Unigene41297_All
Unigene47625_All
Unigene49602_All
Unigene7019_All
Unigene99_All
