# Supplementary material for: Identification of Functional Gene Modules Associated With STAT-Mediated Antiviral Responses to White Spot Syndrome Virus in Shrimp
Source: Front Physiol. 2019 Mar 11;10:212. doi: 10.3389/fphys.2019.00212 (PMC6421301; doi:10.3389/fphys.2019.00212)
Supplement: FILE S2 — Candidate modules specially affected by STAT during WSSV infection. [file Data_Sheet_2.ZIP › CMASWs/854.txt]

CL1462.Contig1_All
CL2309.Contig4_All
CL2652.Contig2_All
CL3940.Contig2_All
CL5655.Contig4_All
CL5805.Contig3_All
CL6173.Contig4_All
Unigene10498_All
Unigene13006_All
Unigene13815_All
Unigene2146_All
Unigene21885_All
Unigene25810_All
Unigene27544_All
Unigene27678_All
Unigene28869_All
Unigene28982_All
Unigene29307_All
Unigene29724_All
Unigene31272_All
Unigene32001_All
Unigene334_All
Unigene3981_All
Unigene45596_All
Unigene47249_All
Unigene48585_All
Unigene5356_All
Unigene5924_All
Unigene6282_All
Unigene6712_All
Unigene7243_All
