# Supplementary material for: Identification of Functional Gene Modules Associated With STAT-Mediated Antiviral Responses to White Spot Syndrome Virus in Shrimp
Source: Front Physiol. 2019 Mar 11;10:212. doi: 10.3389/fphys.2019.00212 (PMC6421301; doi:10.3389/fphys.2019.00212)
Supplement: FILE S2 — Candidate modules specially affected by STAT during WSSV infection. [file Data_Sheet_2.ZIP › CMASWs/860.txt]

CL1143.Contig2_All
CL157.Contig1_All
CL1584.Contig10_All
CL1976.Contig3_All
CL207.Contig30_All
CL2704.Contig1_All
CL289.Contig2_All
CL3247.Contig2_All
CL3451.Contig2_All
CL5175.Contig2_All
CL5940.Contig2_All
CL93.Contig3_All
Unigene11182_All
Unigene12945_All
Unigene18208_All
Unigene26373_All
Unigene27613_All
Unigene28832_All
Unigene28901_All
Unigene31625_All
Unigene3516_All
Unigene3535_All
Unigene36312_All
Unigene39737_All
Unigene40587_All
Unigene41263_All
Unigene43251_All
Unigene44842_All
Unigene44922_All
Unigene45315_All
Unigene45598_All
Unigene48415_All
Unigene5523_All
Unigene8866_All
