# Supplementary material for: Identification of Functional Gene Modules Associated With STAT-Mediated Antiviral Responses to White Spot Syndrome Virus in Shrimp
Source: Front Physiol. 2019 Mar 11;10:212. doi: 10.3389/fphys.2019.00212 (PMC6421301; doi:10.3389/fphys.2019.00212)
Supplement: FILE S2 — Candidate modules specially affected by STAT during WSSV infection. [file Data_Sheet_2.ZIP › CMASWs/862.txt]

CL1105.Contig2_All
CL1831.Contig4_All
CL2130.Contig2_All
CL2751.Contig2_All
CL2920.Contig1_All
CL3053.Contig2_All
CL3212.Contig3_All
CL3237.Contig1_All
CL3290.Contig1_All
CL4308.Contig3_All
CL4344.Contig1_All
CL452.Contig2_All
CL4582.Contig1_All
CL5616.Contig1_All
CL5940.Contig2_All
Unigene10084_All
Unigene11316_All
Unigene12526_All
Unigene13747_All
Unigene14038_All
Unigene17625_All
Unigene21628_All
Unigene21990_All
Unigene22748_All
Unigene24262_All
Unigene24704_All
Unigene26373_All
Unigene27630_All
Unigene27970_All
Unigene28288_All
Unigene28621_All
Unigene29572_All
Unigene32523_All
Unigene3349_All
Unigene3516_All
Unigene36312_All
Unigene36515_All
Unigene41243_All
Unigene42334_All
Unigene42818_All
Unigene44922_All
Unigene45391_All
Unigene46396_All
Unigene6869_All
Unigene7183_All
