# Supplementary material for: Identification of Functional Gene Modules Associated With STAT-Mediated Antiviral Responses to White Spot Syndrome Virus in Shrimp
Source: Front Physiol. 2019 Mar 11;10:212. doi: 10.3389/fphys.2019.00212 (PMC6421301; doi:10.3389/fphys.2019.00212)
Supplement: FILE S2 — Candidate modules specially affected by STAT during WSSV infection. [file Data_Sheet_2.ZIP › CMASWs/864.txt]

CL1034.Contig1_All
CL113.Contig2_All
CL1313.Contig1_All
CL2032.Contig2_All
CL242.Contig15_All
CL2803.Contig1_All
CL3074.Contig6_All
CL3704.Contig1_All
CL4267.Contig2_All
CL4760.Contig3_All
Unigene10151_All
Unigene13073_All
Unigene16048_All
Unigene25478_All
Unigene25644_All
Unigene30548_All
Unigene3397_All
Unigene40394_All
Unigene43617_All
Unigene45685_All
Unigene46814_All
Unigene47086_All
Unigene47401_All
Unigene48901_All
Unigene6201_All
Unigene6923_All
Unigene7494_All
Unigene7657_All
