# Supplementary material for: Identification of Functional Gene Modules Associated With STAT-Mediated Antiviral Responses to White Spot Syndrome Virus in Shrimp
Source: Front Physiol. 2019 Mar 11;10:212. doi: 10.3389/fphys.2019.00212 (PMC6421301; doi:10.3389/fphys.2019.00212)
Supplement: FILE S2 — Candidate modules specially affected by STAT during WSSV infection. [file Data_Sheet_2.ZIP › CMASWs/866.txt]

CL1512.Contig6_All
CL1546.Contig6_All
CL1567.Contig3_All
CL1816.Contig5_All
CL19.Contig4_All
CL2036.Contig1_All
CL207.Contig28_All
CL2078.Contig2_All
CL23.Contig8_All
CL250.Contig2_All
CL2528.Contig1_All
CL2761.Contig3_All
CL3852.Contig1_All
CL440.Contig3_All
CL4687.Contig1_All
CL4812.Contig3_All
CL5096.Contig2_All
CL5189.Contig2_All
CL5909.Contig2_All
CL6051.Contig1_All
CL657.Contig2_All
CL765.Contig5_All
CL831.Contig1_All
CL88.Contig13_All
Unigene13681_All
Unigene13785_All
Unigene13938_All
Unigene1668_All
Unigene1674_All
Unigene17394_All
Unigene17437_All
Unigene18174_All
Unigene20123_All
Unigene2175_All
Unigene21898_All
Unigene25752_All
Unigene26166_All
Unigene2942_All
Unigene30720_All
Unigene32786_All
Unigene33407_All
Unigene34412_All
Unigene36211_All
Unigene36462_All
Unigene37964_All
Unigene38233_All
Unigene38352_All
Unigene3940_All
Unigene40206_All
Unigene42497_All
Unigene43596_All
Unigene43973_All
Unigene44132_All
Unigene45313_All
Unigene45395_All
Unigene45619_All
Unigene46392_All
Unigene46965_All
Unigene48106_All
Unigene4863_All
Unigene49815_All
Unigene6341_All
Unigene6399_All
Unigene7035_All
Unigene9225_All
Unigene9965_All
