# Supplementary material for: Identification of Functional Gene Modules Associated With STAT-Mediated Antiviral Responses to White Spot Syndrome Virus in Shrimp
Source: Front Physiol. 2019 Mar 11;10:212. doi: 10.3389/fphys.2019.00212 (PMC6421301; doi:10.3389/fphys.2019.00212)
Supplement: FILE S2 — Candidate modules specially affected by STAT during WSSV infection. [file Data_Sheet_2.ZIP › CMASWs/871.txt]

CL1302.Contig1_All
CL1313.Contig5_All
CL1984.Contig1_All
CL2147.Contig3_All
CL3229.Contig2_All
CL3511.Contig3_All
CL3595.Contig3_All
CL365.Contig4_All
CL4051.Contig2_All
CL4512.Contig1_All
CL5114.Contig1_All
CL5316.Contig1_All
CL5546.Contig2_All
CL558.Contig1_All
CL6267.Contig1_All
CL6280.Contig4_All
Unigene10690_All
Unigene1181_All
Unigene14113_All
Unigene14310_All
Unigene14340_All
Unigene16925_All
Unigene17060_All
Unigene18487_All
Unigene20883_All
Unigene21341_All
Unigene22284_All
Unigene25889_All
Unigene28487_All
Unigene29263_All
Unigene29296_All
Unigene29466_All
Unigene3125_All
Unigene31463_All
Unigene31639_All
Unigene32035_All
Unigene32135_All
Unigene38841_All
Unigene41195_All
Unigene41344_All
Unigene41360_All
Unigene43937_All
Unigene44243_All
Unigene4463_All
Unigene45330_All
Unigene45593_All
Unigene46382_All
Unigene48470_All
Unigene48889_All
Unigene5474_All
Unigene5614_All
Unigene6599_All
Unigene7560_All
Unigene9838_All
