# Supplementary material for: Identification of Functional Gene Modules Associated With STAT-Mediated Antiviral Responses to White Spot Syndrome Virus in Shrimp
Source: Front Physiol. 2019 Mar 11;10:212. doi: 10.3389/fphys.2019.00212 (PMC6421301; doi:10.3389/fphys.2019.00212)
Supplement: FILE S2 — Candidate modules specially affected by STAT during WSSV infection. [file Data_Sheet_2.ZIP › CMASWs/872.txt]

CL1174.Contig1_All
CL17.Contig18_All
CL1857.Contig2_All
CL1954.Contig1_All
CL2486.Contig1_All
CL2573.Contig2_All
CL3062.Contig2_All
CL3564.Contig6_All
CL3570.Contig1_All
CL3694.Contig2_All
CL4055.Contig1_All
CL507.Contig2_All
CL6194.Contig1_All
CL6227.Contig1_All
CL86.Contig13_All
CL945.Contig2_All
CL995.Contig2_All
CL995.Contig3_All
Unigene22205_All
Unigene26003_All
Unigene28903_All
Unigene29659_All
Unigene32113_All
Unigene3260_All
Unigene3346_All
Unigene34046_All
Unigene36468_All
Unigene36546_All
Unigene43134_All
Unigene43804_All
Unigene43995_All
Unigene44493_All
Unigene48568_All
Unigene48826_All
Unigene48870_All
Unigene49962_All
Unigene5662_All
Unigene5866_All
