# Supplementary material for: Identification of Functional Gene Modules Associated With STAT-Mediated Antiviral Responses to White Spot Syndrome Virus in Shrimp
Source: Front Physiol. 2019 Mar 11;10:212. doi: 10.3389/fphys.2019.00212 (PMC6421301; doi:10.3389/fphys.2019.00212)
Supplement: FILE S2 — Candidate modules specially affected by STAT during WSSV infection. [file Data_Sheet_2.ZIP › CMASWs/880.txt]

CL2666.Contig3_All
CL2687.Contig2_All
CL2896.Contig2_All
CL3666.Contig2_All
CL387.Contig2_All
CL4206.Contig1_All
CL4403.Contig2_All
CL4751.Contig1_All
CL4988.Contig2_All
CL5765.Contig2_All
CL627.Contig3_All
CL635.Contig2_All
CL831.Contig12_All
CL995.Contig4_All
Unigene10296_All
Unigene10342_All
Unigene10705_All
Unigene17267_All
Unigene21400_All
Unigene21415_All
Unigene22266_All
Unigene25091_All
Unigene26124_All
Unigene33200_All
Unigene33242_All
Unigene35825_All
Unigene36767_All
Unigene36977_All
Unigene37068_All
Unigene38402_All
Unigene43581_All
Unigene44957_All
Unigene46628_All
Unigene46644_All
Unigene5715_All
Unigene633_All
Unigene9708_All
