# Supplementary material for: Identification of Functional Gene Modules Associated With STAT-Mediated Antiviral Responses to White Spot Syndrome Virus in Shrimp
Source: Front Physiol. 2019 Mar 11;10:212. doi: 10.3389/fphys.2019.00212 (PMC6421301; doi:10.3389/fphys.2019.00212)
Supplement: FILE S2 — Candidate modules specially affected by STAT during WSSV infection. [file Data_Sheet_2.ZIP › CMASWs/894.txt]

CL1779.Contig2_All
CL2820.Contig6_All
CL289.Contig2_All
CL3247.Contig2_All
CL3451.Contig2_All
CL4696.Contig2_All
CL5127.Contig1_All
CL5730.Contig4_All
CL870.Contig1_All
Unigene11081_All
Unigene1267_All
Unigene13629_All
Unigene13651_All
Unigene14894_All
Unigene16524_All
Unigene21728_All
Unigene24042_All
Unigene28596_All
Unigene28901_All
Unigene35106_All
Unigene38487_All
Unigene41263_All
Unigene43493_All
Unigene45598_All
Unigene5198_All
Unigene7188_All
