# Supplementary material for: Identification of Functional Gene Modules Associated With STAT-Mediated Antiviral Responses to White Spot Syndrome Virus in Shrimp
Source: Front Physiol. 2019 Mar 11;10:212. doi: 10.3389/fphys.2019.00212 (PMC6421301; doi:10.3389/fphys.2019.00212)
Supplement: FILE S2 — Candidate modules specially affected by STAT during WSSV infection. [file Data_Sheet_2.ZIP › CMASWs/896.txt]

CL1093.Contig4_All
CL2272.Contig3_All
CL3532.Contig1_All
CL3722.Contig2_All
CL398.Contig25_All
CL4197.Contig1_All
CL470.Contig2_All
CL515.Contig2_All
CL86.Contig7_All
CL872.Contig1_All
CL889.Contig7_All
CL980.Contig1_All
Unigene1284_All
Unigene14835_All
Unigene17810_All
Unigene23854_All
Unigene31944_All
Unigene34396_All
Unigene37347_All
Unigene38484_All
Unigene42904_All
Unigene42924_All
Unigene44173_All
Unigene45405_All
Unigene47177_All
Unigene8337_All
Unigene9942_All
