# Supplementary material for: Identification of Functional Gene Modules Associated With STAT-Mediated Antiviral Responses to White Spot Syndrome Virus in Shrimp
Source: Front Physiol. 2019 Mar 11;10:212. doi: 10.3389/fphys.2019.00212 (PMC6421301; doi:10.3389/fphys.2019.00212)
Supplement: FILE S2 — Candidate modules specially affected by STAT during WSSV infection. [file Data_Sheet_2.ZIP › CMASWs/898.txt]

CL1324.Contig2_All
CL1450.Contig5_All
CL1567.Contig3_All
CL1831.Contig1_All
CL3879.Contig1_All
CL4002.Contig2_All
CL4537.Contig1_All
CL5259.Contig1_All
CL5621.Contig2_All
CL6046.Contig1_All
CL877.Contig7_All
CL88.Contig13_All
Unigene10281_All
Unigene13672_All
Unigene16652_All
Unigene16895_All
Unigene22169_All
Unigene24719_All
Unigene24810_All
Unigene24951_All
Unigene25175_All
Unigene32090_All
Unigene33482_All
Unigene40206_All
Unigene40840_All
Unigene43617_All
Unigene45735_All
Unigene46392_All
Unigene48782_All
Unigene6584_All
Unigene9253_All
Unigene9330_All
Unigene9358_All
