# Supplementary material for: Identification of Functional Gene Modules Associated With STAT-Mediated Antiviral Responses to White Spot Syndrome Virus in Shrimp
Source: Front Physiol. 2019 Mar 11;10:212. doi: 10.3389/fphys.2019.00212 (PMC6421301; doi:10.3389/fphys.2019.00212)
Supplement: FILE S2 — Candidate modules specially affected by STAT during WSSV infection. [file Data_Sheet_2.ZIP › CMASWs/917.txt]

CL1550.Contig1_All
CL1735.Contig3_All
CL225.Contig2_All
CL2309.Contig4_All
CL251.Contig4_All
CL4518.Contig1_All
CL4641.Contig2_All
CL5095.Contig1_All
CL586.Contig3_All
Unigene10498_All
Unigene17342_All
Unigene18051_All
Unigene23987_All
Unigene27729_All
Unigene29712_All
Unigene31272_All
Unigene35058_All
Unigene37815_All
Unigene48826_All
