# Supplementary material for: Identification of Functional Gene Modules Associated With STAT-Mediated Antiviral Responses to White Spot Syndrome Virus in Shrimp
Source: Front Physiol. 2019 Mar 11;10:212. doi: 10.3389/fphys.2019.00212 (PMC6421301; doi:10.3389/fphys.2019.00212)
Supplement: FILE S2 — Candidate modules specially affected by STAT during WSSV infection. [file Data_Sheet_2.ZIP › CMASWs/921.txt]

CL1980.Contig2_All
CL2169.Contig8_All
CL2200.Contig1_All
CL2489.Contig3_All
CL2761.Contig4_All
CL3123.Contig6_All
CL3254.Contig2_All
CL3285.Contig2_All
CL3594.Contig1_All
CL4173.Contig2_All
CL4234.Contig2_All
CL4659.Contig2_All
CL492.Contig2_All
CL6201.Contig1_All
CL718.Contig3_All
Unigene10429_All
Unigene10431_All
Unigene10996_All
Unigene12260_All
Unigene13484_All
Unigene13760_All
Unigene17331_All
Unigene17898_All
Unigene18490_All
Unigene18689_All
Unigene1985_All
Unigene20226_All
Unigene20932_All
Unigene23376_All
Unigene24786_All
Unigene24855_All
Unigene28810_All
Unigene28855_All
Unigene29619_All
Unigene32041_All
Unigene32130_All
Unigene33407_All
Unigene35290_All
Unigene3568_All
Unigene3665_All
Unigene41326_All
Unigene43991_All
Unigene44774_All
Unigene45823_All
Unigene47827_All
Unigene48422_All
Unigene6774_All
Unigene6_All
Unigene8013_All
