# Supplementary material for: Identification of Functional Gene Modules Associated With STAT-Mediated Antiviral Responses to White Spot Syndrome Virus in Shrimp
Source: Front Physiol. 2019 Mar 11;10:212. doi: 10.3389/fphys.2019.00212 (PMC6421301; doi:10.3389/fphys.2019.00212)
Supplement: FILE S2 — Candidate modules specially affected by STAT during WSSV infection. [file Data_Sheet_2.ZIP › CMASWs/925.txt]

CL1064.Contig2_All
CL1093.Contig3_All
CL1293.Contig2_All
CL1788.Contig2_All
CL1921.Contig1_All
CL2907.Contig2_All
CL3680.Contig1_All
CL3838.Contig3_All
CL398.Contig17_All
CL4179.Contig2_All
CL4353.Contig2_All
CL4970.Contig1_All
Unigene11621_All
Unigene11913_All
Unigene18973_All
Unigene21373_All
Unigene21699_All
Unigene2223_All
Unigene2548_All
Unigene27256_All
Unigene29317_All
Unigene30421_All
Unigene32867_All
Unigene3394_All
Unigene34750_All
Unigene35383_All
Unigene37356_All
Unigene37617_All
Unigene38272_All
Unigene43499_All
Unigene43790_All
Unigene44384_All
Unigene45184_All
Unigene49725_All
Unigene6389_All
Unigene6544_All
Unigene6764_All
Unigene7544_All
