# Supplementary material for: Identification of Functional Gene Modules Associated With STAT-Mediated Antiviral Responses to White Spot Syndrome Virus in Shrimp
Source: Front Physiol. 2019 Mar 11;10:212. doi: 10.3389/fphys.2019.00212 (PMC6421301; doi:10.3389/fphys.2019.00212)
Supplement: FILE S2 — Candidate modules specially affected by STAT during WSSV infection. [file Data_Sheet_2.ZIP › CMASWs/928.txt]

CL1096.Contig2_All
CL1111.Contig2_All
CL1425.Contig1_All
CL1961.Contig3_All
CL1976.Contig1_All
CL2175.Contig3_All
CL2458.Contig2_All
CL3017.Contig2_All
CL3109.Contig1_All
CL3833.Contig2_All
CL5273.Contig2_All
CL5573.Contig2_All
CL5881.Contig2_All
CL823.Contig3_All
Unigene11171_All
Unigene11874_All
Unigene12628_All
Unigene18051_All
Unigene20685_All
Unigene24951_All
Unigene28059_All
Unigene37048_All
Unigene38269_All
Unigene44697_All
Unigene49430_All
Unigene49476_All
Unigene6243_All
