# Supplementary material for: Identification of Functional Gene Modules Associated With STAT-Mediated Antiviral Responses to White Spot Syndrome Virus in Shrimp
Source: Front Physiol. 2019 Mar 11;10:212. doi: 10.3389/fphys.2019.00212 (PMC6421301; doi:10.3389/fphys.2019.00212)
Supplement: FILE S2 — Candidate modules specially affected by STAT during WSSV infection. [file Data_Sheet_2.ZIP › CMASWs/931.txt]

CL1435.Contig2_All
CL2842.Contig4_All
CL2918.Contig2_All
CL3601.Contig1_All
CL4383.Contig1_All
CL441.Contig2_All
CL4433.Contig2_All
CL4771.Contig2_All
Unigene20117_All
Unigene20431_All
Unigene2146_All
Unigene25347_All
Unigene25918_All
Unigene31303_All
Unigene34326_All
Unigene47086_All
Unigene5227_All
