# Supplementary material for: Identification of Functional Gene Modules Associated With STAT-Mediated Antiviral Responses to White Spot Syndrome Virus in Shrimp
Source: Front Physiol. 2019 Mar 11;10:212. doi: 10.3389/fphys.2019.00212 (PMC6421301; doi:10.3389/fphys.2019.00212)
Supplement: FILE S2 — Candidate modules specially affected by STAT during WSSV infection. [file Data_Sheet_2.ZIP › CMASWs/944.txt]

CL1240.Contig2_All
CL1302.Contig1_All
CL1615.Contig1_All
CL217.Contig2_All
CL2344.Contig1_All
CL2392.Contig2_All
CL2406.Contig2_All
CL2796.Contig1_All
CL5047.Contig1_All
CL5066.Contig3_All
CL6193.Contig1_All
Unigene10224_All
Unigene12092_All
Unigene13775_All
Unigene14395_All
Unigene16226_All
Unigene21714_All
Unigene28778_All
Unigene29413_All
Unigene31638_All
Unigene33205_All
Unigene35058_All
Unigene44659_All
Unigene44920_All
Unigene46137_All
Unigene47346_All
Unigene47740_All
Unigene48810_All
Unigene6610_All
Unigene9623_All
