# Supplementary material for: Identification of Functional Gene Modules Associated With STAT-Mediated Antiviral Responses to White Spot Syndrome Virus in Shrimp
Source: Front Physiol. 2019 Mar 11;10:212. doi: 10.3389/fphys.2019.00212 (PMC6421301; doi:10.3389/fphys.2019.00212)
Supplement: FILE S2 — Candidate modules specially affected by STAT during WSSV infection. [file Data_Sheet_2.ZIP › CMASWs/948.txt]

CL1172.Contig5_All
CL2736.Contig8_All
CL3810.Contig1_All
CL4201.Contig2_All
CL4242.Contig2_All
CL4595.Contig3_All
CL462.Contig2_All
CL5212.Contig1_All
CL5309.Contig4_All
Unigene11070_All
Unigene12531_All
Unigene13168_All
Unigene16735_All
Unigene16998_All
Unigene18455_All
Unigene21981_All
Unigene252_All
Unigene25813_All
Unigene25913_All
Unigene26108_All
Unigene27568_All
Unigene29221_All
Unigene36263_All
Unigene40812_All
Unigene41257_All
Unigene4130_All
Unigene42850_All
Unigene42866_All
Unigene44485_All
Unigene45296_All
Unigene46984_All
Unigene47357_All
Unigene6831_All
Unigene7508_All
Unigene9361_All
