# Supplementary material for: Identification of Functional Gene Modules Associated With STAT-Mediated Antiviral Responses to White Spot Syndrome Virus in Shrimp
Source: Front Physiol. 2019 Mar 11;10:212. doi: 10.3389/fphys.2019.00212 (PMC6421301; doi:10.3389/fphys.2019.00212)
Supplement: FILE S2 — Candidate modules specially affected by STAT during WSSV infection. [file Data_Sheet_2.ZIP › CMASWs/949.txt]

CL1638.Contig2_All
CL3145.Contig2_All
CL3237.Contig3_All
CL4156.Contig2_All
CL4279.Contig2_All
CL4518.Contig1_All
CL6135.Contig1_All
Unigene10894_All
Unigene18217_All
Unigene20861_All
Unigene25064_All
Unigene26003_All
Unigene27426_All
Unigene28789_All
Unigene35876_All
Unigene37246_All
Unigene40655_All
Unigene41310_All
Unigene5301_All
Unigene9761_All
