# Supplementary material for: Identification of Functional Gene Modules Associated With STAT-Mediated Antiviral Responses to White Spot Syndrome Virus in Shrimp
Source: Front Physiol. 2019 Mar 11;10:212. doi: 10.3389/fphys.2019.00212 (PMC6421301; doi:10.3389/fphys.2019.00212)
Supplement: FILE S2 — Candidate modules specially affected by STAT during WSSV infection. [file Data_Sheet_2.ZIP › CMASWs/954.txt]

CL1425.Contig1_All
CL2124.Contig1_All
CL2913.Contig3_All
CL3149.Contig1_All
CL375.Contig3_All
CL396.Contig3_All
CL503.Contig1_All
CL5845.Contig2_All
CL5880.Contig2_All
CL5963.Contig1_All
CL6152.Contig1_All
CL6262.Contig1_All
CL6335.Contig1_All
CL991.Contig11_All
Unigene10870_All
Unigene11305_All
Unigene13734_All
Unigene15041_All
Unigene17337_All
Unigene17477_All
Unigene1811_All
Unigene18411_All
Unigene20680_All
Unigene21603_All
Unigene2249_All
Unigene24786_All
Unigene28059_All
Unigene28787_All
Unigene29060_All
Unigene29169_All
Unigene29709_All
Unigene30669_All
Unigene31408_All
Unigene34196_All
Unigene34809_All
Unigene34928_All
Unigene36234_All
Unigene38619_All
Unigene43026_All
Unigene45288_All
Unigene48411_All
Unigene5561_All
Unigene6604_All
Unigene6712_All
Unigene7243_All
Unigene7375_All
Unigene7417_All
Unigene9969_All
