# Supplementary material for: Identification of Functional Gene Modules Associated With STAT-Mediated Antiviral Responses to White Spot Syndrome Virus in Shrimp
Source: Front Physiol. 2019 Mar 11;10:212. doi: 10.3389/fphys.2019.00212 (PMC6421301; doi:10.3389/fphys.2019.00212)
Supplement: FILE S2 — Candidate modules specially affected by STAT during WSSV infection. [file Data_Sheet_2.ZIP › CMASWs/955.txt]

CL1064.Contig2_All
CL1184.Contig1_All
CL225.Contig2_All
CL244.Contig2_All
CL310.Contig1_All
CL3283.Contig1_All
CL4063.Contig3_All
CL4508.Contig1_All
CL4742.Contig1_All
CL4831.Contig1_All
CL644.Contig3_All
CL763.Contig4_All
Unigene12817_All
Unigene1715_All
Unigene1856_All
Unigene18891_All
Unigene20383_All
Unigene26083_All
Unigene28334_All
Unigene35707_All
Unigene37353_All
Unigene43237_All
Unigene43499_All
Unigene43784_All
Unigene4615_All
Unigene4679_All
Unigene48427_All
Unigene5795_All
