# Supplementary material for: Identification of Functional Gene Modules Associated With STAT-Mediated Antiviral Responses to White Spot Syndrome Virus in Shrimp
Source: Front Physiol. 2019 Mar 11;10:212. doi: 10.3389/fphys.2019.00212 (PMC6421301; doi:10.3389/fphys.2019.00212)
Supplement: FILE S2 — Candidate modules specially affected by STAT during WSSV infection. [file Data_Sheet_2.ZIP › CMASWs/973.txt]

CL237.Contig29_All
CL2467.Contig4_All
CL37.Contig22_All
CL3810.Contig1_All
CL4132.Contig2_All
CL4990.Contig2_All
CL5495.Contig2_All
CL5752.Contig1_All
CL827.Contig1_All
Unigene13740_All
Unigene14211_All
Unigene18040_All
Unigene18190_All
Unigene18685_All
Unigene21021_All
Unigene21767_All
Unigene22728_All
Unigene24151_All
Unigene27017_All
Unigene33196_All
Unigene40138_All
Unigene44380_All
Unigene47827_All
Unigene48431_All
