# Supplementary material for: Identification of Functional Gene Modules Associated With STAT-Mediated Antiviral Responses to White Spot Syndrome Virus in Shrimp
Source: Front Physiol. 2019 Mar 11;10:212. doi: 10.3389/fphys.2019.00212 (PMC6421301; doi:10.3389/fphys.2019.00212)
Supplement: FILE S2 — Candidate modules specially affected by STAT during WSSV infection. [file Data_Sheet_2.ZIP › CMASWs/975.txt]

CL1054.Contig4_All
CL1131.Contig1_All
CL1257.Contig2_All
CL1733.Contig1_All
CL2483.Contig1_All
CL2701.Contig2_All
CL2927.Contig2_All
CL3597.Contig2_All
CL6262.Contig2_All
CL774.Contig1_All
Unigene12431_All
Unigene14640_All
Unigene14947_All
Unigene17663_All
Unigene22500_All
Unigene25361_All
Unigene25847_All
Unigene2857_All
Unigene31473_All
Unigene31522_All
Unigene32281_All
Unigene33065_All
Unigene38872_All
Unigene40141_All
Unigene42848_All
Unigene47162_All
Unigene47813_All
Unigene48186_All
Unigene5642_All
