# Supplementary material for: Identification of Functional Gene Modules Associated With STAT-Mediated Antiviral Responses to White Spot Syndrome Virus in Shrimp
Source: Front Physiol. 2019 Mar 11;10:212. doi: 10.3389/fphys.2019.00212 (PMC6421301; doi:10.3389/fphys.2019.00212)
Supplement: FILE S2 — Candidate modules specially affected by STAT during WSSV infection. [file Data_Sheet_2.ZIP › CMASWs/980.txt]

CL1180.Contig1_All
CL1251.Contig2_All
CL237.Contig1_All
CL2471.Contig2_All
CL2685.Contig3_All
CL2761.Contig3_All
CL3050.Contig1_All
CL3239.Contig3_All
CL3363.Contig2_All
CL3548.Contig4_All
CL3852.Contig1_All
CL3863.Contig1_All
CL4772.Contig3_All
CL5189.Contig2_All
CL5283.Contig1_All
CL5495.Contig2_All
CL5841.Contig1_All
CL590.Contig3_All
CL6354.Contig2_All
CL765.Contig5_All
CL970.Contig1_All
Unigene13518_All
Unigene17474_All
Unigene18162_All
Unigene18174_All
Unigene21336_All
Unigene21957_All
Unigene2264_All
Unigene25566_All
Unigene2588_All
Unigene27917_All
Unigene30501_All
Unigene3235_All
Unigene3334_All
Unigene33407_All
Unigene3366_All
Unigene3548_All
Unigene37595_All
Unigene39382_All
Unigene40816_All
Unigene41815_All
Unigene42677_All
Unigene44835_All
Unigene45039_All
Unigene45872_All
Unigene46451_All
Unigene46827_All
Unigene47061_All
Unigene47412_All
Unigene48105_All
Unigene48484_All
Unigene49682_All
Unigene49971_All
