# Supplementary material for: Identification of Functional Gene Modules Associated With STAT-Mediated Antiviral Responses to White Spot Syndrome Virus in Shrimp
Source: Front Physiol. 2019 Mar 11;10:212. doi: 10.3389/fphys.2019.00212 (PMC6421301; doi:10.3389/fphys.2019.00212)
Supplement: FILE S2 — Candidate modules specially affected by STAT during WSSV infection. [file Data_Sheet_2.ZIP › CMASWs/983.txt]

CL10.Contig7_All
CL2344.Contig2_All
CL242.Contig12_All
CL2728.Contig2_All
CL2870.Contig1_All
CL2926.Contig2_All
CL3058.Contig1_All
CL3447.Contig2_All
CL3571.Contig3_All
CL3706.Contig2_All
CL4843.Contig2_All
CL4847.Contig1_All
CL536.Contig2_All
CL5447.Contig1_All
CL5667.Contig2_All
CL5728.Contig2_All
CL5836.Contig1_All
CL5845.Contig1_All
CL587.Contig1_All
CL718.Contig2_All
CL857.Contig2_All
Unigene10218_All
Unigene14386_All
Unigene14656_All
Unigene16155_All
Unigene21554_All
Unigene22285_All
Unigene23890_All
Unigene24759_All
Unigene25691_All
Unigene27336_All
Unigene28170_All
Unigene28900_All
Unigene32115_All
Unigene35587_All
Unigene35731_All
Unigene36512_All
Unigene37467_All
Unigene38194_All
Unigene38906_All
Unigene42189_All
Unigene42627_All
Unigene44482_All
Unigene48855_All
Unigene48864_All
Unigene7424_All
Unigene8748_All
Unigene9554_All
