# Supplementary material for: Identification of Functional Gene Modules Associated With STAT-Mediated Antiviral Responses to White Spot Syndrome Virus in Shrimp
Source: Front Physiol. 2019 Mar 11;10:212. doi: 10.3389/fphys.2019.00212 (PMC6421301; doi:10.3389/fphys.2019.00212)
Supplement: FILE S2 — Candidate modules specially affected by STAT during WSSV infection. [file Data_Sheet_2.ZIP › CMASWs/993.txt]

CL1093.Contig3_All
CL1240.Contig3_All
CL147.Contig1_All
CL1925.Contig3_All
CL2027.Contig3_All
CL2483.Contig2_All
CL3598.Contig2_All
CL3680.Contig1_All
CL3838.Contig3_All
CL4179.Contig2_All
CL4970.Contig1_All
CL5300.Contig2_All
Unigene11913_All
Unigene13094_All
Unigene13727_All
Unigene18973_All
Unigene20845_All
Unigene21373_All
Unigene21699_All
Unigene26720_All
Unigene27256_All
Unigene31453_All
Unigene32088_All
Unigene33685_All
Unigene3394_All
Unigene33971_All
Unigene34750_All
Unigene35346_All
Unigene37015_All
Unigene37260_All
Unigene37386_All
Unigene37617_All
Unigene39720_All
Unigene43499_All
Unigene43790_All
Unigene46258_All
Unigene46409_All
Unigene49725_All
Unigene49917_All
Unigene5076_All
Unigene7544_All
