# Supplementary material for: Identification of Functional Gene Modules Associated With STAT-Mediated Antiviral Responses to White Spot Syndrome Virus in Shrimp
Source: Front Physiol. 2019 Mar 11;10:212. doi: 10.3389/fphys.2019.00212 (PMC6421301; doi:10.3389/fphys.2019.00212)
Supplement: FILE S2 — Candidate modules specially affected by STAT during WSSV infection. [file Data_Sheet_2.ZIP › CMASWs/995.txt]

CL113.Contig2_All
CL161.Contig32_All
CL1859.Contig2_All
CL2518.Contig2_All
CL2648.Contig1_All
CL2756.Contig1_All
CL3478.Contig2_All
CL3548.Contig4_All
CL4002.Contig2_All
CL4551.Contig1_All
CL4795.Contig1_All
CL85.Contig6_All
CL970.Contig1_All
Unigene15413_All
Unigene1561_All
Unigene16702_All
Unigene17500_All
Unigene241_All
Unigene24951_All
Unigene25781_All
Unigene25855_All
Unigene29239_All
Unigene29783_All
Unigene31392_All
Unigene37815_All
Unigene41307_All
Unigene42011_All
Unigene42876_All
Unigene44660_All
Unigene49724_All
Unigene6633_All
