# Supplementary material for: Identification of Functional Gene Modules Associated With STAT-Mediated Antiviral Responses to White Spot Syndrome Virus in Shrimp
Source: Front Physiol. 2019 Mar 11;10:212. doi: 10.3389/fphys.2019.00212 (PMC6421301; doi:10.3389/fphys.2019.00212)
Supplement: FILE S2 — Candidate modules specially affected by STAT during WSSV infection. [file Data_Sheet_2.ZIP › CMASWs/999.txt]

CL1093.Contig3_All
CL2917.Contig1_All
CL3266.Contig2_All
CL3821.Contig1_All
CL4184.Contig2_All
CL4303.Contig2_All
CL4703.Contig2_All
CL492.Contig6_All
CL5344.Contig2_All
CL6162.Contig1_All
CL6177.Contig1_All
Unigene16532_All
Unigene18378_All
Unigene21215_All
Unigene22413_All
Unigene23456_All
Unigene2365_All
Unigene23680_All
Unigene24657_All
Unigene25894_All
Unigene26374_All
Unigene28281_All
Unigene28342_All
Unigene29429_All
Unigene3032_All
Unigene33065_All
Unigene33814_All
Unigene36166_All
Unigene36384_All
Unigene38433_All
Unigene41130_All
Unigene44329_All
Unigene44482_All
Unigene44490_All
Unigene44568_All
Unigene45749_All
Unigene46138_All
Unigene46258_All
Unigene47256_All
Unigene47475_All
Unigene49792_All
Unigene49827_All
Unigene6093_All
Unigene9644_All
