# Supplementary material for: Identification of Functional Gene Modules Associated With STAT-Mediated Antiviral Responses to White Spot Syndrome Virus in Shrimp
Source: Front Physiol. 2019 Mar 11;10:212. doi: 10.3389/fphys.2019.00212 (PMC6421301; doi:10.3389/fphys.2019.00212)
Supplement: FILE S2 — Candidate modules specially affected by STAT during WSSV infection. [file Data_Sheet_2.ZIP › CMASWs/1002.txt]

CL105.Contig3_All
CL1169.Contig2_All
CL1174.Contig1_All
CL1435.Contig2_All
CL1922.Contig3_All
CL2093.Contig3_All
CL3191.Contig3_All
CL4432.Contig3_All
CL4506.Contig1_All
CL4553.Contig3_All
CL5351.Contig1_All
CL86.Contig13_All
Unigene12464_All
Unigene18602_All
Unigene29098_All
Unigene29277_All
Unigene29837_All
Unigene31303_All
Unigene3346_All
Unigene40098_All
Unigene43521_All
Unigene43995_All
Unigene45812_All
Unigene47575_All
Unigene48653_All
Unigene5133_All
Unigene6592_All
