# Supplementary material for: Identification of Functional Gene Modules Associated With STAT-Mediated Antiviral Responses to White Spot Syndrome Virus in Shrimp
Source: Front Physiol. 2019 Mar 11;10:212. doi: 10.3389/fphys.2019.00212 (PMC6421301; doi:10.3389/fphys.2019.00212)
Supplement: FILE S2 — Candidate modules specially affected by STAT during WSSV infection. [file Data_Sheet_2.ZIP › CMASWs/1011.txt]

CL1006.Contig2_All
CL1034.Contig1_All
CL1067.Contig1_All
CL1157.Contig3_All
CL1313.Contig1_All
CL2548.Contig3_All
CL2803.Contig1_All
CL2865.Contig1_All
CL3089.Contig2_All
CL4165.Contig1_All
CL4212.Contig1_All
CL4390.Contig4_All
CL5726.Contig1_All
Unigene10151_All
Unigene13073_All
Unigene14369_All
Unigene16048_All
Unigene18167_All
Unigene21944_All
Unigene25478_All
Unigene30548_All
Unigene36537_All
Unigene36751_All
Unigene44609_All
Unigene48901_All
Unigene49419_All
Unigene8546_All
