# Supplementary material for: Identification of Functional Gene Modules Associated With STAT-Mediated Antiviral Responses to White Spot Syndrome Virus in Shrimp
Source: Front Physiol. 2019 Mar 11;10:212. doi: 10.3389/fphys.2019.00212 (PMC6421301; doi:10.3389/fphys.2019.00212)
Supplement: FILE S2 — Candidate modules specially affected by STAT during WSSV infection. [file Data_Sheet_2.ZIP › CMASWs/1032.txt]

CL1224.Contig2_All
CL1230.Contig2_All
CL1444.Contig5_All
CL150.Contig3_All
CL1517.Contig1_All
CL1535.Contig7_All
CL1939.Contig1_All
CL213.Contig2_All
CL2139.Contig8_All
CL2190.Contig2_All
CL2198.Contig2_All
CL2441.Contig9_All
CL2470.Contig1_All
CL2685.Contig2_All
CL3662.Contig3_All
CL4190.Contig2_All
CL4259.Contig3_All
CL4274.Contig1_All
CL4625.Contig1_All
CL5617.Contig2_All
CL6180.Contig2_All
CL756.Contig5_All
CL969.Contig4_All
Unigene10967_All
Unigene14998_All
Unigene1748_All
Unigene20908_All
Unigene21453_All
Unigene21730_All
Unigene24899_All
Unigene29358_All
Unigene2987_All
Unigene32128_All
Unigene32441_All
Unigene33114_All
Unigene36095_All
Unigene36925_All
Unigene38548_All
Unigene39261_All
Unigene40056_All
Unigene41189_All
Unigene41650_All
Unigene42061_All
Unigene43512_All
Unigene44634_All
Unigene47434_All
Unigene48087_All
Unigene48672_All
Unigene48970_All
Unigene6485_All
Unigene6772_All
Unigene70_All
Unigene7265_All
Unigene8721_All
Unigene9098_All
Unigene9513_All
