# Supplementary material for: Identification of Functional Gene Modules Associated With STAT-Mediated Antiviral Responses to White Spot Syndrome Virus in Shrimp
Source: Front Physiol. 2019 Mar 11;10:212. doi: 10.3389/fphys.2019.00212 (PMC6421301; doi:10.3389/fphys.2019.00212)
Supplement: FILE S2 — Candidate modules specially affected by STAT during WSSV infection. [file Data_Sheet_2.ZIP › CMASWs/1033.txt]

CL1160.Contig2_All
CL1328.Contig1_All
CL2519.Contig1_All
CL2995.Contig3_All
CL3212.Contig3_All
CL3290.Contig1_All
CL3328.Contig1_All
CL4140.Contig2_All
CL4710.Contig1_All
CL5744.Contig2_All
CL5788.Contig2_All
CL5950.Contig1_All
CL6160.Contig2_All
CL896.Contig2_All
Unigene10046_All
Unigene10455_All
Unigene11470_All
Unigene15191_All
Unigene16296_All
Unigene1663_All
Unigene17001_All
Unigene20179_All
Unigene21687_All
Unigene2245_All
Unigene22840_All
Unigene24120_All
Unigene24704_All
Unigene26032_All
Unigene28288_All
Unigene28621_All
Unigene29551_All
Unigene31494_All
Unigene36037_All
Unigene36515_All
Unigene38620_All
Unigene41243_All
Unigene42061_All
Unigene43654_All
Unigene45440_All
Unigene45716_All
Unigene48119_All
Unigene50007_All
Unigene6613_All
Unigene6864_All
Unigene6993_All
Unigene7348_All
