# Supplementary material for: Identification of Functional Gene Modules Associated With STAT-Mediated Antiviral Responses to White Spot Syndrome Virus in Shrimp
Source: Front Physiol. 2019 Mar 11;10:212. doi: 10.3389/fphys.2019.00212 (PMC6421301; doi:10.3389/fphys.2019.00212)
Supplement: FILE S2 — Candidate modules specially affected by STAT during WSSV infection. [file Data_Sheet_2.ZIP › CMASWs/1037.txt]

CL113.Contig2_All
CL161.Contig32_All
CL2032.Contig2_All
CL2803.Contig1_All
CL2825.Contig1_All
CL3074.Contig6_All
CL3704.Contig1_All
CL4002.Contig2_All
CL4755.Contig2_All
CL949.Contig2_All
Unigene10151_All
Unigene11101_All
Unigene13073_All
Unigene16048_All
Unigene16524_All
Unigene16652_All
Unigene2401_All
Unigene24110_All
Unigene25644_All
Unigene28811_All
Unigene32188_All
Unigene33210_All
Unigene35393_All
Unigene42782_All
Unigene44252_All
Unigene48633_All
Unigene48782_All
Unigene9437_All
