# Supplementary material for: Identification of Functional Gene Modules Associated With STAT-Mediated Antiviral Responses to White Spot Syndrome Virus in Shrimp
Source: Front Physiol. 2019 Mar 11;10:212. doi: 10.3389/fphys.2019.00212 (PMC6421301; doi:10.3389/fphys.2019.00212)
Supplement: FILE S2 — Candidate modules specially affected by STAT during WSSV infection. [file Data_Sheet_2.ZIP › CMASWs/1044.txt]

CL1034.Contig1_All
CL113.Contig2_All
CL2032.Contig2_All
CL2146.Contig1_All
CL242.Contig15_All
CL2687.Contig2_All
CL2803.Contig1_All
CL3704.Contig1_All
Unigene10151_All
Unigene13073_All
Unigene13623_All
Unigene16048_All
Unigene16866_All
Unigene25478_All
Unigene30548_All
Unigene3397_All
Unigene43259_All
Unigene43617_All
Unigene45406_All
Unigene47401_All
Unigene48901_All
Unigene6923_All
Unigene7657_All
Unigene8546_All
Unigene9849_All
