# Supplementary material for: Identification of Functional Gene Modules Associated With STAT-Mediated Antiviral Responses to White Spot Syndrome Virus in Shrimp
Source: Front Physiol. 2019 Mar 11;10:212. doi: 10.3389/fphys.2019.00212 (PMC6421301; doi:10.3389/fphys.2019.00212)
Supplement: FILE S2 — Candidate modules specially affected by STAT during WSSV infection. [file Data_Sheet_2.ZIP › CMASWs/1048.txt]

CL1006.Contig11_All
CL1143.Contig2_All
CL1240.Contig3_All
CL1467.Contig4_All
CL1795.Contig3_All
CL1848.Contig5_All
CL187.Contig2_All
CL2059.Contig4_All
CL2408.Contig2_All
CL3102.Contig1_All
CL3645.Contig2_All
CL3863.Contig1_All
CL4537.Contig2_All
CL4702.Contig1_All
CL5320.Contig2_All
CL6339.Contig2_All
CL980.Contig6_All
Unigene14312_All
Unigene1593_All
Unigene20845_All
Unigene22081_All
Unigene22295_All
Unigene25811_All
Unigene2616_All
Unigene28621_All
Unigene31937_All
Unigene33053_All
Unigene38815_All
Unigene40335_All
Unigene46225_All
Unigene5126_All
Unigene6373_All
Unigene9629_All
