# Supplementary material for: Identification of Functional Gene Modules Associated With STAT-Mediated Antiviral Responses to White Spot Syndrome Virus in Shrimp
Source: Front Physiol. 2019 Mar 11;10:212. doi: 10.3389/fphys.2019.00212 (PMC6421301; doi:10.3389/fphys.2019.00212)
Supplement: FILE S2 — Candidate modules specially affected by STAT during WSSV infection. [file Data_Sheet_2.ZIP › CMASWs/1052.txt]

CL1128.Contig2_All
CL1190.Contig20_All
CL1242.Contig4_All
CL1243.Contig2_All
CL1243.Contig4_All
CL156.Contig3_All
CL2225.Contig2_All
CL3778.Contig1_All
CL4002.Contig2_All
CL4093.Contig3_All
Unigene10519_All
Unigene16524_All
Unigene17466_All
Unigene19828_All
Unigene20518_All
Unigene2129_All
Unigene21728_All
Unigene21767_All
Unigene2352_All
Unigene23988_All
Unigene24193_All
Unigene241_All
Unigene2755_All
Unigene27784_All
Unigene28228_All
Unigene28596_All
Unigene29239_All
Unigene31352_All
Unigene32898_All
Unigene32906_All
Unigene33380_All
Unigene35106_All
Unigene38487_All
Unigene40186_All
Unigene40758_All
Unigene44672_All
Unigene45619_All
Unigene46392_All
Unigene5649_All
Unigene6276_All
Unigene6510_All
Unigene7255_All
Unigene7278_All
Unigene8770_All
Unigene9437_All
Unigene9845_All
