# Supplementary material for: Identification of Functional Gene Modules Associated With STAT-Mediated Antiviral Responses to White Spot Syndrome Virus in Shrimp
Source: Front Physiol. 2019 Mar 11;10:212. doi: 10.3389/fphys.2019.00212 (PMC6421301; doi:10.3389/fphys.2019.00212)
Supplement: FILE S2 — Candidate modules specially affected by STAT during WSSV infection. [file Data_Sheet_2.ZIP › CMASWs/1054.txt]

CL1627.Contig1_All
CL1771.Contig2_All
CL2069.Contig1_All
CL2165.Contig1_All
CL2281.Contig4_All
CL3266.Contig2_All
CL3486.Contig1_All
CL3508.Contig2_All
CL3716.Contig1_All
CL3831.Contig3_All
CL4623.Contig1_All
CL4703.Contig2_All
CL5222.Contig2_All
CL5791.Contig1_All
Unigene18053_All
Unigene23890_All
Unigene28908_All
Unigene33136_All
Unigene33300_All
Unigene38194_All
Unigene38718_All
Unigene3905_All
Unigene48775_All
Unigene5757_All
Unigene6884_All
Unigene8748_All
