# Supplementary material for: Identification of Functional Gene Modules Associated With STAT-Mediated Antiviral Responses to White Spot Syndrome Virus in Shrimp
Source: Front Physiol. 2019 Mar 11;10:212. doi: 10.3389/fphys.2019.00212 (PMC6421301; doi:10.3389/fphys.2019.00212)
Supplement: FILE S4 — Modules affected by both WSSV and STAT. [file Data_Sheet_4.ZIP]

Archive with 575 entries (574 files):
- modules.affected.by.WSSV.and.STAT/
- modules.affected.by.WSSV.and.STAT/fitDegGroup1_1.txt
- modules.affected.by.WSSV.and.STAT/fitDegGroup1_2.txt
- modules.affected.by.WSSV.and.STAT/fitDegGroup1_3.txt
- modules.affected.by.WSSV.and.STAT/fitDegGroup1_4.txt
- modules.affected.by.WSSV.and.STAT/fitDegGroup1_5.txt
- modules.affected.by.WSSV.and.STAT/fitDegGroup1_6.txt
- modules.affected.by.WSSV.and.STAT/fitDegGroup1_7.txt
- modules.affected.by.WSSV.and.STAT/fitDegGroup1_8.txt
- modules.affected.by.WSSV.and.STAT/fitDegGroup1_9.txt
- modules.affected.by.WSSV.and.STAT/fitDegGroup1_10.txt
- modules.affected.by.WSSV.and.STAT/fitDegGroup1_11.txt
- modules.affected.by.WSSV.and.STAT/fitDegGroup1_12.txt
- modules.affected.by.WSSV.and.STAT/fitDegGroup1_13.txt
- modules.affected.by.WSSV.and.STAT/fitDegGroup1_14.txt
- modules.affected.by.WSSV.and.STAT/fitDegGroup1_15.txt
- modules.affected.by.WSSV.and.STAT/fitDegGroup1_16.txt
- modules.affected.by.WSSV.and.STAT/fitDegGroup1_17.txt
- modules.affected.by.WSSV.and.STAT/fitDegGroup1_18.txt
- modules.affected.by.WSSV.and.STAT/fitDegGroup1_19.txt
- modules.affected.by.WSSV.and.STAT/fitDegGroup1_20.txt
- modules.affected.by.WSSV.and.STAT/fitDegGroup1_21.txt
- modules.affected.by.WSSV.and.STAT/fitDegGroup1_22.txt
- modules.affected.by.WSSV.and.STAT/fitDegGroup1_23.txt
- modules.affected.by.WSSV.and.STAT/fitDegGroup1_24.txt
- modules.affected.by.WSSV.and.STAT/fitDegGroup1_25.txt
- modules.affected.by.WSSV.and.STAT/fitDegGroup1_26.txt
- modules.affected.by.WSSV.and.STAT/fitDegGroup1_27.txt
- modules.affected.by.WSSV.and.STAT/fitDegGroup1_28.txt
- modules.affected.by.WSSV.and.STAT/fitDegGroup1_29.txt
- modules.affected.by.WSSV.and.STAT/fitDegGroup1_30.txt
- modules.affected.by.WSSV.and.STAT/fitDegGroup1_31.txt
- modules.affected.by.WSSV.and.STAT/fitDegGroup1_32.txt
- modules.affected.by.WSSV.and.STAT/fitDegGroup1_33.txt
- modules.affected.by.WSSV.and.STAT/fitDegGroup1_34.txt
- modules.affected.by.WSSV.and.STAT/fitDegGroup1_35.txt
- modules.affected.by.WSSV.and.STAT/fitDegGroup1_36.txt
- modules.affected.by.WSSV.and.STAT/fitDegGroup1_37.txt
- modules.affected.by.WSSV.and.STAT/fitDegGroup1_38.txt
- modules.affected.by.WSSV.and.STAT/fitDegGroup1_39.txt
- modules.affected.by.WSSV.and.STAT/fitDegGroup1_40.txt
- modules.affected.by.WSSV.and.STAT/fitDegGroup1_41.txt
- modules.affected.by.WSSV.and.STAT/fitDegGroup1_42.txt
- modules.affected.by.WSSV.and.STAT/fitDegGroup1_43.txt
- modules.affected.by.WSSV.and.STAT/fitDegGroup1_44.txt
- modules.affected.by.WSSV.and.STAT/fitDegGroup1_45.txt
- modules.affected.by.WSSV.and.STAT/fitDegGroup1_46.txt
- modules.affected.by.WSSV.and.STAT/fitDegGroup1_47.txt
- modules.affected.by.WSSV.and.STAT/fitDegGroup1_48.txt
- modules.affected.by.WSSV.and.STAT/fitDegGroup1_49.txt
- modules.affected.by.WSSV.and.STAT/fitDegGroup1_50.txt
- modules.affected.by.WSSV.and.STAT/fitDegGroup1_51.txt
- modules.affected.by.WSSV.and.STAT/fitDegGroup1_52.txt
- modules.affected.by.WSSV.and.STAT/fitDegGroup1_53.txt
- modules.affected.by.WSSV.and.STAT/fitDegGroup1_54.txt
- modules.affected.by.WSSV.and.STAT/fitDegGroup1_55.txt
- modules.affected.by.WSSV.and.STAT/fitDegGroup1_56.txt
- modules.affected.by.WSSV.and.STAT/fitDegGroup1_57.txt
- modules.affected.by.WSSV.and.STAT/fitDegGroup1_58.txt
- modules.affected.by.WSSV.and.STAT/fitDegGroup1_59.txt
- modules.affected.by.WSSV.and.STAT/fitDegGroup1_60.txt
- modules.affected.by.WSSV.and.STAT/fitDegGroup1_61.txt
- modules.affected.by.WSSV.and.STAT/fitDegGroup1_62.txt
- modules.affected.by.WSSV.and.STAT/fitDegGroup1_63.txt
- modules.affected.by.WSSV.and.STAT/fitDegGroup1_64.txt
- modules.affected.by.WSSV.and.STAT/fitDegGroup1_65.txt
- modules.affected.by.WSSV.and.STAT/fitDegGroup1_66.txt
- modules.affected.by.WSSV.and.STAT/fitDegGroup1_67.txt
- modules.affected.by.WSSV.and.STAT/fitDegGroup1_68.txt
- modules.affected.by.WSSV.and.STAT/fitDegGroup1_69.txt
- modules.affected.by.WSSV.and.STAT/fitDegGroup1_70.txt
- modules.affected.by.WSSV.and.STAT/fitDegGroup1_71.txt
- modules.affected.by.WSSV.and.STAT/fitDegGroup1_72.txt
- modules.affected.by.WSSV.and.STAT/fitDegGroup1_73.txt
- modules.affected.by.WSSV.and.STAT/fitDegGroup1_74.txt
- modules.affected.by.WSSV.and.STAT/fitDegGroup1_75.txt
- modules.affected.by.WSSV.and.STAT/fitDegGroup1_76.txt
- modules.affected.by.WSSV.and.STAT/fitDegGroup1_77.txt
- modules.affected.by.WSSV.and.STAT/fitDegGroup1_78.txt
- modules.affected.by.WSSV.and.STAT/fitDegGroup1_79.txt
- modules.affected.by.WSSV.and.STAT/fitDegGroup1_80.txt
- modules.affected.by.WSSV.and.STAT/fitDegGroup1_81.txt
- modules.affected.by.WSSV.and.STAT/fitDegGroup1_82.txt
- modules.affected.by.WSSV.and.STAT/fitDegGroup1_83.txt
- modules.affected.by.WSSV.and.STAT/fitDegGroup1_84.txt
- modules.affected.by.WSSV.and.STAT/fitDegGroup1_85.txt
- modules.affected.by.WSSV.and.STAT/fitDegGroup1_86.txt
- modules.affected.by.WSSV.and.STAT/fitDegGroup1_87.txt
- modules.affected.by.WSSV.and.STAT/fitDegGroup1_88.txt
- modules.affected.by.WSSV.and.STAT/fitDegGroup1_89.txt
- modules.affected.by.WSSV.and.STAT/fitDegGroup1_90.txt
- modules.affected.by.WSSV.and.STAT/fitDegGroup1_91.txt
- modules.affected.by.WSSV.and.STAT/fitDegGroup1_92.txt
- modules.affected.by.WSSV.and.STAT/fitDegGroup1_93.txt
- modules.affected.by.WSSV.and.STAT/fitDegGroup1_94.txt
- modules.affected.by.WSSV.and.STAT/fitDegGroup1_95.txt
- modules.affected.by.WSSV.and.STAT/fitDegGroup1_96.txt
- modules.affected.by.WSSV.and.STAT/fitDegGroup1_97.txt
- modules.affected.by.WSSV.and.STAT/fitDegGroup1_98.txt
- modules.affected.by.WSSV.and.STAT/fitDegGroup1_99.txt
- modules.affected.by.WSSV.and.STAT/fitDegGroup1_100.txt
- modules.affected.by.WSSV.and.STAT/fitDegGroup1_101.txt
- modules.affected.by.WSSV.and.STAT/fitDegGroup1_102.txt
- modules.affected.by.WSSV.and.STAT/fitDegGroup1_103.txt
- modules.affected.by.WSSV.and.STAT/fitDegGroup1_104.txt
- modules.affected.by.WSSV.and.STAT/fitDegGroup1_105.txt
- modules.affected.by.WSSV.and.STAT/fitDegGroup1_106.txt
- modules.affected.by.WSSV.and.STAT/fitDegGroup1_107.txt
- modules.affected.by.WSSV.and.STAT/fitDegGroup1_108.txt
- modules.affected.by.WSSV.and.STAT/fitDegGroup1_109.txt
- modules.affected.by.WSSV.and.STAT/fitDegGroup1_110.txt
- modules.affected.by.WSSV.and.STAT/fitDegGroup1_111.txt
- modules.affected.by.WSSV.and.STAT/fitDegGroup1_112.txt
- modules.affected.by.WSSV.and.STAT/fitDegGroup1_113.txt
- modules.affected.by.WSSV.and.STAT/fitDegGroup1_114.txt
- modules.affected.by.WSSV.and.STAT/fitDegGroup1_115.txt
- modules.affected.by.WSSV.and.STAT/fitDegGroup1_116.txt
- modules.affected.by.WSSV.and.STAT/fitDegGroup1_117.txt
- modules.affected.by.WSSV.and.STAT/fitDegGroup1_118.txt
- modules.affected.by.WSSV.and.STAT/fitDegGroup1_119.txt
- modules.affected.by.WSSV.and.STAT/fitDegGroup1_120.txt
- modules.affected.by.WSSV.and.STAT/fitDegGroup1_121.txt
- modules.affected.by.WSSV.and.STAT/fitDegGroup1_122.txt
- modules.affected.by.WSSV.and.STAT/fitDegGroup1_123.txt
- modules.affected.by.WSSV.and.STAT/fitDegGroup1_124.txt
- modules.affected.by.WSSV.and.STAT/fitDegGroup1_125.txt
- modules.affected.by.WSSV.and.STAT/fitDegGroup1_126.txt
- modules.affected.by.WSSV.and.STAT/fitDegGroup1_127.txt
- modules.affected.by.WSSV.and.STAT/fitDegGroup1_128.txt
- modules.affected.by.WSSV.and.STAT/fitDegGroup1_129.txt
- modules.affected.by.WSSV.and.STAT/fitDegGroup1_130.txt
- modules.affected.by.WSSV.and.STAT/fitDegGroup1_131.txt
- modules.affected.by.WSSV.and.STAT/fitDegGroup1_132.txt
- modules.affected.by.WSSV.and.STAT/fitDegGroup1_133.txt
- modules.affected.by.WSSV.and.STAT/fitDegGroup1_134.txt
- modules.affected.by.WSSV.and.STAT/fitDegGroup1_135.txt
- modules.affected.by.WSSV.and.STAT/fitDegGroup1_136.txt
- modules.affected.by.WSSV.and.STAT/fitDegGroup1_137.txt
- modules.affected.by.WSSV.and.STAT/fitDegGroup1_138.txt
- modules.affected.by.WSSV.and.STAT/fitDegGroup1_139.txt
- modules.affected.by.WSSV.and.STAT/fitDegGroup1_140.txt
- modules.affected.by.WSSV.and.STAT/fitDegGroup1_141.txt
- modules.affected.by.WSSV.and.STAT/fitDegGroup1_142.txt
- modules.affected.by.WSSV.and.STAT/fitDegGroup1_143.txt
- modules.affected.by.WSSV.and.STAT/fitDegGroup1_144.txt
- modules.affected.by.WSSV.and.STAT/fitDegGroup1_145.txt
- modules.affected.by.WSSV.and.STAT/fitDegGroup1_146.txt
- modules.affected.by.WSSV.and.STAT/fitDegGroup1_147.txt
- modules.affected.by.WSSV.and.STAT/fitDegGroup1_148.txt
- modules.affected.by.WSSV.and.STAT/fitDegGroup1_149.txt
- modules.affected.by.WSSV.and.STAT/fitDegGroup1_150.txt
- modules.affected.by.WSSV.and.STAT/fitDegGroup1_151.txt
- modules.affected.by.WSSV.and.STAT/fitDegGroup1_152.txt
- modules.affected.by.WSSV.and.STAT/fitDegGroup1_153.txt
- modules.affected.by.WSSV.and.STAT/fitDegGroup1_154.txt
- modules.affected.by.WSSV.and.STAT/fitDegGroup1_155.txt
- modules.affected.by.WSSV.and.STAT/fitDegGroup1_156.txt
- modules.affected.by.WSSV.and.STAT/fitDegGroup1_157.txt
- modules.affected.by.WSSV.and.STAT/fitDegGroup1_158.txt
- modules.affected.by.WSSV.and.STAT/fitDegGroup1_159.txt
- modules.affected.by.WSSV.and.STAT/fitDegGroup1_160.txt
- modules.affected.by.WSSV.and.STAT/fitDegGroup1_161.txt
- modules.affected.by.WSSV.and.STAT/fitDegGroup1_162.txt
- modules.affected.by.WSSV.and.STAT/fitDegGroup1_163.txt
- modules.affected.by.WSSV.and.STAT/fitDegGroup1_164.txt
- modules.affected.by.WSSV.and.STAT/fitDegGroup1_165.txt
- modules.affected.by.WSSV.and.STAT/fitDegGroup1_166.txt
- modules.affected.by.WSSV.and.STAT/fitDegGroup1_167.txt
- modules.affected.by.WSSV.and.STAT/fitDegGroup1_168.txt
- modules.affected.by.WSSV.and.STAT/fitDegGroup1_169.txt
- modules.affected.by.WSSV.and.STAT/fitDegGroup1_170.txt
- modules.affected.by.WSSV.and.STAT/fitDegGroup1_171.txt
- modules.affected.by.WSSV.and.STAT/fitDegGroup1_172.txt
- modules.affected.by.WSSV.and.STAT/fitDegGroup1_173.txt
- modules.affected.by.WSSV.and.STAT/fitDegGroup1_174.txt
- modules.affected.by.WSSV.and.STAT/fitDegGroup1_175.txt
- modules.affected.by.WSSV.and.STAT/fitDegGroup1_176.txt
- modules.affected.by.WSSV.and.STAT/fitDegGroup1_177.txt
- modules.affected.by.WSSV.and.STAT/fitDegGroup1_178.txt
- modules.affected.by.WSSV.and.STAT/fitDegGroup1_179.txt
- modules.affected.by.WSSV.and.STAT/fitDegGroup1_180.txt
- modules.affected.by.WSSV.and.STAT/fitDegGroup1_181.txt
- modules.affected.by.WSSV.and.STAT/fitDegGroup1_182.txt
- modules.affected.by.WSSV.and.STAT/fitDegGroup1_183.txt
- modules.affected.by.WSSV.and.STAT/fitDegGroup1_184.txt
- modules.affected.by.WSSV.and.STAT/fitDegGroup1_185.txt
- modules.affected.by.WSSV.and.STAT/fitDegGroup1_186.txt
- modules.affected.by.WSSV.and.STAT/fitDegGroup1_187.txt
- modules.affected.by.WSSV.and.STAT/fitDegGroup1_188.txt
- modules.affected.by.WSSV.and.STAT/fitDegGroup1_189.txt
- modules.affected.by.WSSV.and.STAT/fitDegGroup1_190.txt
- modules.affected.by.WSSV.and.STAT/fitDegGroup1_191.txt
- modules.affected.by.WSSV.and.STAT/fitDegGroup1_192.txt
- modules.affected.by.WSSV.and.STAT/fitDegGroup1_193.txt
- modules.affected.by.WSSV.and.STAT/fitDegGroup1_194.txt
- modules.affected.by.WSSV.and.STAT/fitDegGroup1_195.txt
- modules.affected.by.WSSV.and.STAT/fitDegGroup1_196.txt
- modules.affected.by.WSSV.and.STAT/fitDegGroup1_197.txt
- modules.affected.by.WSSV.and.STAT/fitDegGroup1_198.txt
- modules.affected.by.WSSV.and.STAT/fitDegGroup1_199.txt
- modules.affected.by.WSSV.and.STAT/fitDegGroup1_200.txt
- modules.affected.by.WSSV.and.STAT/fitDegGroup1_201.txt
- modules.affected.by.WSSV.and.STAT/fitDegGroup1_202.txt
- modules.affected.by.WSSV.and.STAT/fitDegGroup1_203.txt
- modules.affected.by.WSSV.and.STAT/fitDegGroup1_204.txt
- modules.affected.by.WSSV.and.STAT/fitDegGroup1_205.txt
- modules.affected.by.WSSV.and.STAT/fitDegGroup1_206.txt
- modules.affected.by.WSSV.and.STAT/fitDegGroup1_207.txt
- modules.affected.by.WSSV.and.STAT/fitDegGroup1_208.txt
- modules.affected.by.WSSV.and.STAT/fitDegGroup1_209.txt
- modules.affected.by.WSSV.and.STAT/fitDegGroup1_210.txt
- modules.affected.by.WSSV.and.STAT/fitDegGroup1_211.txt
- modules.affected.by.WSSV.and.STAT/fitDegGroup1_212.txt
- modules.affected.by.WSSV.and.STAT/fitDegGroup1_213.txt
- modules.affected.by.WSSV.and.STAT/fitDegGroup1_214.txt
- modules.affected.by.WSSV.and.STAT/fitDegGroup1_215.txt
- modules.affected.by.WSSV.and.STAT/fitDegGroup1_216.txt
- modules.affected.by.WSSV.and.STAT/fitDegGroup1_217.txt
- modules.affected.by.WSSV.and.STAT/fitDegGroup1_218.txt
- modules.affected.by.WSSV.and.STAT/fitDegGroup1_219.txt
- modules.affected.by.WSSV.and.STAT/fitDegGroup1_220.txt
- modules.affected.by.WSSV.and.STAT/fitDegGroup1_221.txt
- modules.affected.by.WSSV.and.STAT/fitDegGroup1_222.txt
- modules.affected.by.WSSV.and.STAT/fitDegGroup1_223.txt
- modules.affected.by.WSSV.and.STAT/fitDegGroup1_224.txt
- modules.affected.by.WSSV.and.STAT/fitDegGroup1_225.txt
- modules.affected.by.WSSV.and.STAT/fitDegGroup1_226.txt
- modules.affected.by.WSSV.and.STAT/fitDegGroup1_227.txt
- modules.affected.by.WSSV.and.STAT/fitDegGroup1_228.txt
- modules.affected.by.WSSV.and.STAT/fitDegGroup1_229.txt
- modules.affected.by.WSSV.and.STAT/fitDegGroup1_230.txt
- modules.affected.by.WSSV.and.STAT/fitDegGroup1_231.txt
- modules.affected.by.WSSV.and.STAT/fitDegGroup1_232.txt
- modules.affected.by.WSSV.and.STAT/fitDegGroup1_233.txt
- modules.affected.by.WSSV.and.STAT/fitDegGroup1_234.txt
- modules.affected.by.WSSV.and.STAT/fitDegGroup1_235.txt
- modules.affected.by.WSSV.and.STAT/fitDegGroup1_236.txt
- modules.affected.by.WSSV.and.STAT/fitDegGroup1_237.txt
- modules.affected.by.WSSV.and.STAT/fitDegGroup1_238.txt
- modules.affected.by.WSSV.and.STAT/fitDegGroup1_239.txt
- modules.affected.by.WSSV.and.STAT/fitDegGroup1_240.txt
- modules.affected.by.WSSV.and.STAT/fitDegGroup1_241.txt
- modules.affected.by.WSSV.and.STAT/fitDegGroup1_242.txt
- modules.affected.by.WSSV.and.STAT/fitDegGroup1_243.txt
- modules.affected.by.WSSV.and.STAT/fitDegGroup1_244.txt
- modules.affected.by.WSSV.and.STAT/fitDegGroup1_245.txt
- modules.affected.by.WSSV.and.STAT/fitDegGroup1_246.txt
- modules.affected.by.WSSV.and.STAT/fitDegGroup1_247.txt
- modules.affected.by.WSSV.and.STAT/fitDegGroup1_248.txt
- modules.affected.by.WSSV.and.STAT/fitDegGroup1_249.txt
- modules.affected.by.WSSV.and.STAT/fitDegGroup1_250.txt
- modules.affected.by.WSSV.and.STAT/fitDegGroup1_251.txt
- modules.affected.by.WSSV.and.STAT/fitDegGroup1_252.txt
- modules.affected.by.WSSV.and.STAT/fitDegGroup1_253.txt
- modules.affected.by.WSSV.and.STAT/fitDegGroup1_254.txt
- modules.affected.by.WSSV.and.STAT/fitDegGroup1_255.txt
- modules.affected.by.WSSV.and.STAT/fitDegGroup1_256.txt
- modules.affected.by.WSSV.and.STAT/fitDegGroup1_257.txt
- modules.affected.by.WSSV.and.STAT/fitDegGroup1_258.txt
- modules.affected.by.WSSV.and.STAT/fitDegGroup1_259.txt
- modules.affected.by.WSSV.and.STAT/fitDegGroup1_260.txt
- modules.affected.by.WSSV.and.STAT/fitDegGroup1_261.txt
- modules.affected.by.WSSV.and.STAT/fitDegGroup1_262.txt
- modules.affected.by.WSSV.and.STAT/fitDegGroup1_263.txt
- modules.affected.by.WSSV.and.STAT/fitDegGroup1_264.txt
- modules.affected.by.WSSV.and.STAT/fitDegGroup1_265.txt
- modules.affected.by.WSSV.and.STAT/fitDegGroup1_266.txt
- modules.affected.by.WSSV.and.STAT/fitDegGroup1_267.txt
- modules.affected.by.WSSV.and.STAT/fitDegGroup1_268.txt
- modules.affected.by.WSSV.and.STAT/fitDegGroup1_269.txt
- modules.affected.by.WSSV.and.STAT/fitDegGroup1_270.txt
- modules.affected.by.WSSV.and.STAT/fitDegGroup1_271.txt
- modules.affected.by.WSSV.and.STAT/fitDegGroup1_272.txt
- modules.affected.by.WSSV.and.STAT/fitDegGroup1_273.txt
- modules.affected.by.WSSV.and.STAT/fitDegGroup1_274.txt
- modules.affected.by.WSSV.and.STAT/fitDegGroup1_275.txt
- modules.affected.by.WSSV.and.STAT/fitDegGroup1_276.txt
- modules.affected.by.WSSV.and.STAT/fitDegGroup1_277.txt
- modules.affected.by.WSSV.and.STAT/fitDegGroup1_278.txt
- modules.affected.by.WSSV.and.STAT/fitDegGroup1_279.txt
- modules.affected.by.WSSV.and.STAT/fitDegGroup1_280.txt
- modules.affected.by.WSSV.and.STAT/fitDegGroup1_281.txt
- modules.affected.by.WSSV.and.STAT/fitDegGroup1_282.txt
- modules.affected.by.WSSV.and.STAT/fitDegGroup1_283.txt
- modules.affected.by.WSSV.and.STAT/fitDegGroup1_284.txt
- modules.affected.by.WSSV.and.STAT/fitDegGroup1_285.txt
- modules.affected.by.WSSV.and.STAT/fitDegGroup1_286.txt
- modules.affected.by.WSSV.and.STAT/fitDegGroup1_287.txt
- modules.affected.by.WSSV.and.STAT/fitDegGroup1_288.txt
- modules.affected.by.WSSV.and.STAT/fitDegGroup1_289.txt
- modules.affected.by.WSSV.and.STAT/fitDegGroup1_290.txt
- modules.affected.by.WSSV.and.STAT/fitDegGroup1_291.txt
- modules.affected.by.WSSV.and.STAT/fitDegGroup1_292.txt
- modules.affected.by.WSSV.and.STAT/fitDegGroup1_293.txt
- modules.affected.by.WSSV.and.STAT/fitDegGroup1_294.txt
- modules.affected.by.WSSV.and.STAT/fitDegGroup1_295.txt
- modules.affected.by.WSSV.and.STAT/fitDegGroup1_296.txt
- modules.affected.by.WSSV.and.STAT/fitDegGroup1_297.txt
- modules.affected.by.WSSV.and.STAT/fitDegGroup1_298.txt
- modules.affected.by.WSSV.and.STAT/fitDegGroup1_299.txt
[truncated: 275 more entries]
