# Supplementary material for: Identification of Functional Gene Modules Associated With STAT-Mediated Antiviral Responses to White Spot Syndrome Virus in Shrimp
Source: Front Physiol. 2019 Mar 11;10:212. doi: 10.3389/fphys.2019.00212 (PMC6421301; doi:10.3389/fphys.2019.00212)
Supplement: FILE S4 — Modules affected by both WSSV and STAT. [file Data_Sheet_4.ZIP › modules.affected.by.WSSV.and.STAT/fitDegGroup1_14.txt]

CL1178.Contig2_All
CL1399.Contig2_All
CL1881.Contig1_All
CL2578.Contig3_All
CL2738.Contig3_All
CL2934.Contig1_All
CL2950.Contig1_All
CL31.Contig2_All
CL4197.Contig2_All
CL4396.Contig2_All
CL5064.Contig3_All
CL5494.Contig1_All
CL637.Contig2_All
CL799.Contig2_All
CL997.Contig4_All
Unigene10124_All
Unigene10471_All
Unigene14141_All
Unigene18454_All
Unigene18523_All
Unigene21261_All
Unigene21457_All
Unigene22021_All
Unigene22323_All
Unigene2630_All
Unigene27571_All
Unigene28170_All
Unigene33125_All
Unigene35027_All
Unigene37471_All
Unigene38337_All
Unigene39754_All
Unigene41895_All
Unigene44463_All
Unigene45775_All
Unigene46530_All
Unigene47645_All
Unigene48939_All
Unigene5318_All
Unigene7018_All
Unigene7678_All
