# Supplementary material for: Identification of Functional Gene Modules Associated With STAT-Mediated Antiviral Responses to White Spot Syndrome Virus in Shrimp
Source: Front Physiol. 2019 Mar 11;10:212. doi: 10.3389/fphys.2019.00212 (PMC6421301; doi:10.3389/fphys.2019.00212)
Supplement: FILE S4 — Modules affected by both WSSV and STAT. [file Data_Sheet_4.ZIP › modules.affected.by.WSSV.and.STAT/fitDegGroup1_24.txt]

CL1009.Contig2_All
CL1124.Contig5_All
CL1157.Contig2_All
CL124.Contig4_All
CL125.Contig4_All
CL1411.Contig1_All
CL1637.Contig1_All
CL177.Contig1_All
CL2316.Contig5_All
CL2375.Contig2_All
CL2572.Contig1_All
CL4432.Contig1_All
CL4653.Contig4_All
CL4702.Contig1_All
CL4810.Contig1_All
CL544.Contig4_All
CL6308.Contig2_All
Unigene13031_All
Unigene13195_All
Unigene13337_All
Unigene16056_All
Unigene1885_All
Unigene19325_All
Unigene20651_All
Unigene2462_All
Unigene26720_All
Unigene28828_All
Unigene35144_All
Unigene35346_All
Unigene35478_All
Unigene37369_All
Unigene3745_All
Unigene39255_All
Unigene40034_All
Unigene42753_All
Unigene46213_All
Unigene46409_All
Unigene48054_All
Unigene5502_All
Unigene9376_All
