# Supplementary material for: Identification of Functional Gene Modules Associated With STAT-Mediated Antiviral Responses to White Spot Syndrome Virus in Shrimp
Source: Front Physiol. 2019 Mar 11;10:212. doi: 10.3389/fphys.2019.00212 (PMC6421301; doi:10.3389/fphys.2019.00212)
Supplement: FILE S4 — Modules affected by both WSSV and STAT. [file Data_Sheet_4.ZIP › modules.affected.by.WSSV.and.STAT/fitDegGroup1_37.txt]

CL2455.Contig2_All
CL2718.Contig1_All
CL2804.Contig1_All
CL320.Contig14_All
CL4063.Contig3_All
CL4655.Contig1_All
CL4981.Contig2_All
CL5145.Contig1_All
CL5284.Contig1_All
CL5818.Contig1_All
CL6257.Contig1_All
CL943.Contig3_All
Unigene1032_All
Unigene10790_All
Unigene15578_All
Unigene17404_All
Unigene17865_All
Unigene18799_All
Unigene19326_All
Unigene25923_All
Unigene26792_All
Unigene28719_All
Unigene30466_All
Unigene3162_All
Unigene4995_All
Unigene525_All
Unigene5764_All
Unigene6033_All
Unigene6218_All
Unigene9576_All
Unigene95_All
