# Supplementary material for: Identification of Functional Gene Modules Associated With STAT-Mediated Antiviral Responses to White Spot Syndrome Virus in Shrimp
Source: Front Physiol. 2019 Mar 11;10:212. doi: 10.3389/fphys.2019.00212 (PMC6421301; doi:10.3389/fphys.2019.00212)
Supplement: FILE S4 — Modules affected by both WSSV and STAT. [file Data_Sheet_4.ZIP › modules.affected.by.WSSV.and.STAT/fitDegGroup1_41.txt]

CL112.Contig12_All
CL1267.Contig7_All
CL1280.Contig4_All
CL1290.Contig3_All
CL159.Contig4_All
CL1866.Contig2_All
CL2467.Contig4_All
CL2573.Contig2_All
CL273.Contig2_All
CL326.Contig1_All
CL3533.Contig1_All
CL3561.Contig3_All
CL3564.Contig6_All
CL5151.Contig2_All
CL656.Contig1_All
CL656.Contig3_All
CL656.Contig5_All
CL702.Contig3_All
CL970.Contig1_All
Unigene12781_All
Unigene14405_All
Unigene1525_All
Unigene22195_All
Unigene2598_All
Unigene27017_All
Unigene31021_All
Unigene31334_All
Unigene36546_All
Unigene36884_All
Unigene45342_All
Unigene46720_All
Unigene46937_All
Unigene48948_All
Unigene6944_All
Unigene7034_All
Unigene7184_All
