# Supplementary material for: Identification of Functional Gene Modules Associated With STAT-Mediated Antiviral Responses to White Spot Syndrome Virus in Shrimp
Source: Front Physiol. 2019 Mar 11;10:212. doi: 10.3389/fphys.2019.00212 (PMC6421301; doi:10.3389/fphys.2019.00212)
Supplement: FILE S4 — Modules affected by both WSSV and STAT. [file Data_Sheet_4.ZIP › modules.affected.by.WSSV.and.STAT/fitDegGroup1_46.txt]

CL1616.Contig1_All
CL3169.Contig1_All
CL3169.Contig3_All
CL3169.Contig4_All
CL3169.Contig5_All
CL5175.Contig2_All
CL5333.Contig1_All
CL5775.Contig2_All
CL5866.Contig2_All
CL991.Contig1_All
Unigene21037_All
Unigene21522_All
Unigene44842_All
Unigene49175_All
