# Supplementary material for: Identification of Functional Gene Modules Associated With STAT-Mediated Antiviral Responses to White Spot Syndrome Virus in Shrimp
Source: Front Physiol. 2019 Mar 11;10:212. doi: 10.3389/fphys.2019.00212 (PMC6421301; doi:10.3389/fphys.2019.00212)
Supplement: FILE S4 — Modules affected by both WSSV and STAT. [file Data_Sheet_4.ZIP › modules.affected.by.WSSV.and.STAT/fitDegGroup1_56.txt]

CL159.Contig4_All
CL1922.Contig3_All
CL2761.Contig3_All
CL326.Contig1_All
CL3548.Contig4_All
CL3561.Contig3_All
CL3818.Contig2_All
CL4551.Contig1_All
CL5003.Contig2_All
CL5283.Contig1_All
CL5495.Contig2_All
CL5788.Contig1_All
CL619.Contig4_All
CL637.Contig3_All
CL85.Contig6_All
CL970.Contig1_All
Unigene10431_All
Unigene12781_All
Unigene12935_All
Unigene13518_All
Unigene1561_All
Unigene18524_All
Unigene22241_All
Unigene24193_All
Unigene25855_All
Unigene26016_All
Unigene29641_All
Unigene33407_All
Unigene36678_All
Unigene44011_All
Unigene44660_All
Unigene46875_All
Unigene49058_All
Unigene49724_All
Unigene6943_All
Unigene7034_All
