# Supplementary material for: Identification of Functional Gene Modules Associated With STAT-Mediated Antiviral Responses to White Spot Syndrome Virus in Shrimp
Source: Front Physiol. 2019 Mar 11;10:212. doi: 10.3389/fphys.2019.00212 (PMC6421301; doi:10.3389/fphys.2019.00212)
Supplement: FILE S4 — Modules affected by both WSSV and STAT. [file Data_Sheet_4.ZIP › modules.affected.by.WSSV.and.STAT/fitDegGroup1_64.txt]

CL1002.Contig1_All
CL1461.Contig1_All
CL148.Contig1_All
CL1595.Contig1_All
CL1680.Contig2_All
CL1799.Contig2_All
CL1974.Contig2_All
CL2272.Contig2_All
CL3111.Contig2_All
CL3258.Contig1_All
CL3285.Contig1_All
CL3615.Contig1_All
CL4146.Contig1_All
CL4293.Contig1_All
CL4398.Contig3_All
CL4420.Contig2_All
CL4895.Contig2_All
CL5024.Contig1_All
CL5410.Contig1_All
CL5608.Contig1_All
CL889.Contig5_All
Unigene13033_All
Unigene15900_All
Unigene17333_All
Unigene21185_All
Unigene24375_All
Unigene25308_All
Unigene33021_All
Unigene36847_All
