# Supplementary material for: Identification of Functional Gene Modules Associated With STAT-Mediated Antiviral Responses to White Spot Syndrome Virus in Shrimp
Source: Front Physiol. 2019 Mar 11;10:212. doi: 10.3389/fphys.2019.00212 (PMC6421301; doi:10.3389/fphys.2019.00212)
Supplement: FILE S4 — Modules affected by both WSSV and STAT. [file Data_Sheet_4.ZIP › modules.affected.by.WSSV.and.STAT/fitDegGroup1_66.txt]

CL159.Contig4_All
CL1857.Contig2_All
CL237.Contig29_All
CL2467.Contig4_All
CL3611.Contig1_All
CL37.Contig22_All
CL4132.Contig2_All
CL4980.Contig2_All
CL4990.Contig2_All
CL5189.Contig2_All
CL5495.Contig2_All
CL5602.Contig2_All
CL654.Contig7_All
CL827.Contig1_All
Unigene13740_All
Unigene14211_All
Unigene17342_All
Unigene18040_All
Unigene18190_All
Unigene1985_All
Unigene21021_All
Unigene24151_All
Unigene27017_All
Unigene40138_All
Unigene43804_All
Unigene47827_All
Unigene48431_All
Unigene49682_All
Unigene6658_All
Unigene6944_All
