# Supplementary material for: Identification of Functional Gene Modules Associated With STAT-Mediated Antiviral Responses to White Spot Syndrome Virus in Shrimp
Source: Front Physiol. 2019 Mar 11;10:212. doi: 10.3389/fphys.2019.00212 (PMC6421301; doi:10.3389/fphys.2019.00212)
Supplement: FILE S4 — Modules affected by both WSSV and STAT. [file Data_Sheet_4.ZIP › modules.affected.by.WSSV.and.STAT/fitDegGroup1_75.txt]

CL1009.Contig2_All
CL1124.Contig5_All
CL124.Contig4_All
CL1267.Contig4_All
CL2375.Contig2_All
CL2390.Contig6_All
CL2736.Contig8_All
CL3182.Contig1_All
CL33.Contig4_All
CL3526.Contig2_All
CL4201.Contig2_All
CL4432.Contig1_All
CL4653.Contig4_All
CL4820.Contig1_All
CL6314.Contig1_All
Unigene1056_All
Unigene11070_All
Unigene12582_All
Unigene13168_All
Unigene13195_All
Unigene14973_All
Unigene1645_All
Unigene18208_All
Unigene21049_All
Unigene21612_All
Unigene26108_All
Unigene27568_All
Unigene28783_All
Unigene338_All
Unigene35144_All
Unigene37369_All
Unigene3745_All
Unigene3779_All
Unigene39370_All
Unigene40855_All
Unigene42753_All
Unigene42850_All
Unigene48959_All
Unigene49043_All
Unigene5187_All
Unigene6831_All
Unigene9433_All
