# Supplementary material for: Identification of Functional Gene Modules Associated With STAT-Mediated Antiviral Responses to White Spot Syndrome Virus in Shrimp
Source: Front Physiol. 2019 Mar 11;10:212. doi: 10.3389/fphys.2019.00212 (PMC6421301; doi:10.3389/fphys.2019.00212)
Supplement: FILE S4 — Modules affected by both WSSV and STAT. [file Data_Sheet_4.ZIP › modules.affected.by.WSSV.and.STAT/fitDegGroup1_79.txt]

CL120.Contig73_All
CL1981.Contig1_All
CL2380.Contig2_All
CL2842.Contig4_All
CL2918.Contig2_All
CL3601.Contig1_All
CL4135.Contig8_All
CL4186.Contig1_All
CL4771.Contig2_All
Unigene10006_All
Unigene10561_All
Unigene20117_All
Unigene2146_All
Unigene2280_All
Unigene25347_All
Unigene25918_All
Unigene3162_All
Unigene34326_All
Unigene38111_All
Unigene42931_All
Unigene44116_All
Unigene47086_All
Unigene50036_All
Unigene5227_All
