# Supplementary material for: Identification of Functional Gene Modules Associated With STAT-Mediated Antiviral Responses to White Spot Syndrome Virus in Shrimp
Source: Front Physiol. 2019 Mar 11;10:212. doi: 10.3389/fphys.2019.00212 (PMC6421301; doi:10.3389/fphys.2019.00212)
Supplement: FILE S4 — Modules affected by both WSSV and STAT. [file Data_Sheet_4.ZIP › modules.affected.by.WSSV.and.STAT/fitDegGroup1_85.txt]

CL1124.Contig5_All
CL1267.Contig4_All
CL2736.Contig8_All
CL320.Contig20_All
CL3283.Contig2_All
CL462.Contig2_All
CL4653.Contig4_All
CL6237.Contig3_All
CL6314.Contig1_All
CL946.Contig3_All
Unigene11070_All
Unigene11913_All
Unigene13168_All
Unigene13538_All
Unigene1645_All
Unigene18133_All
Unigene18455_All
Unigene21612_All
Unigene22143_All
Unigene25507_All
Unigene26108_All
Unigene27568_All
Unigene36771_All
Unigene40812_All
Unigene40855_All
Unigene42298_All
Unigene42753_All
Unigene42850_All
Unigene47752_All
Unigene48959_All
Unigene6031_All
Unigene6831_All
