# Supplementary material for: Identification of Functional Gene Modules Associated With STAT-Mediated Antiviral Responses to White Spot Syndrome Virus in Shrimp
Source: Front Physiol. 2019 Mar 11;10:212. doi: 10.3389/fphys.2019.00212 (PMC6421301; doi:10.3389/fphys.2019.00212)
Supplement: FILE S4 — Modules affected by both WSSV and STAT. [file Data_Sheet_4.ZIP › modules.affected.by.WSSV.and.STAT/fitDegGroup1_90.txt]

CL2380.Contig2_All
CL2797.Contig3_All
CL3235.Contig2_All
CL4760.Contig3_All
CL5557.Contig1_All
CL6173.Contig4_All
CL831.Contig2_All
Unigene14329_All
Unigene19983_All
Unigene2146_All
Unigene24786_All
Unigene27561_All
Unigene27562_All
Unigene28285_All
Unigene28982_All
Unigene29724_All
Unigene31272_All
Unigene32001_All
Unigene3981_All
Unigene41310_All
Unigene45596_All
Unigene46355_All
Unigene48585_All
Unigene6282_All
Unigene6712_All
Unigene8574_All
Unigene9976_All
