# Supplementary material for: Identification of Functional Gene Modules Associated With STAT-Mediated Antiviral Responses to White Spot Syndrome Virus in Shrimp
Source: Front Physiol. 2019 Mar 11;10:212. doi: 10.3389/fphys.2019.00212 (PMC6421301; doi:10.3389/fphys.2019.00212)
Supplement: FILE S4 — Modules affected by both WSSV and STAT. [file Data_Sheet_4.ZIP › modules.affected.by.WSSV.and.STAT/fitDegGroup1_121.txt]

CL2756.Contig1_All
CL3038.Contig1_All
CL3215.Contig1_All
CL3235.Contig2_All
CL3343.Contig1_All
CL4518.Contig1_All
CL5412.Contig2_All
CL5610.Contig2_All
CL5886.Contig2_All
Unigene10342_All
Unigene12490_All
Unigene13639_All
Unigene15024_All
Unigene1562_All
Unigene17267_All
Unigene20566_All
Unigene21617_All
Unigene23987_All
Unigene2512_All
Unigene25972_All
Unigene26003_All
Unigene26880_All
Unigene28626_All
Unigene29362_All
Unigene30775_All
Unigene30883_All
Unigene32335_All
Unigene33508_All
Unigene36241_All
Unigene36977_All
Unigene38257_All
Unigene41517_All
Unigene43900_All
Unigene46861_All
Unigene6521_All
Unigene7307_All
Unigene7506_All
Unigene8426_All
Unigene9708_All
