# Supplementary material for: Identification of Functional Gene Modules Associated With STAT-Mediated Antiviral Responses to White Spot Syndrome Virus in Shrimp
Source: Front Physiol. 2019 Mar 11;10:212. doi: 10.3389/fphys.2019.00212 (PMC6421301; doi:10.3389/fphys.2019.00212)
Supplement: FILE S4 — Modules affected by both WSSV and STAT. [file Data_Sheet_4.ZIP › modules.affected.by.WSSV.and.STAT/fitDegGroup1_125.txt]

CL1015.Contig3_All
CL1400.Contig1_All
CL1831.Contig3_All
CL2146.Contig1_All
CL2378.Contig1_All
CL5252.Contig2_All
CL5434.Contig2_All
CL5478.Contig2_All
CL5634.Contig1_All
CL5685.Contig2_All
CL5835.Contig1_All
CL5936.Contig1_All
Unigene11257_All
Unigene14874_All
Unigene21154_All
Unigene21409_All
Unigene2250_All
Unigene25829_All
Unigene26542_All
Unigene27537_All
Unigene28657_All
Unigene28778_All
Unigene31445_All
Unigene39830_All
Unigene43259_All
Unigene45406_All
Unigene46207_All
Unigene49858_All
Unigene7098_All
