# Supplementary material for: Identification of Functional Gene Modules Associated With STAT-Mediated Antiviral Responses to White Spot Syndrome Virus in Shrimp
Source: Front Physiol. 2019 Mar 11;10:212. doi: 10.3389/fphys.2019.00212 (PMC6421301; doi:10.3389/fphys.2019.00212)
Supplement: FILE S4 — Modules affected by both WSSV and STAT. [file Data_Sheet_4.ZIP › modules.affected.by.WSSV.and.STAT/fitDegGroup1_126.txt]

CL1290.Contig3_All
CL159.Contig4_All
CL1857.Contig2_All
CL1980.Contig2_All
CL2467.Contig4_All
CL2471.Contig2_All
CL2486.Contig1_All
CL2761.Contig3_All
CL3130.Contig3_All
CL3239.Contig3_All
CL3254.Contig2_All
CL3275.Contig1_All
CL3548.Contig4_All
CL3611.Contig1_All
CL3818.Contig2_All
CL3852.Contig1_All
CL5189.Contig2_All
CL5283.Contig1_All
CL5495.Contig2_All
CL5602.Contig2_All
CL5881.Contig1_All
CL590.Contig3_All
CL654.Contig7_All
CL656.Contig5_All
CL765.Contig5_All
CL827.Contig1_All
CL970.Contig1_All
Unigene10431_All
Unigene11022_All
Unigene12935_All
Unigene17342_All
Unigene18174_All
Unigene1985_All
Unigene24193_All
Unigene2513_All
Unigene3260_All
Unigene33407_All
Unigene36678_All
Unigene36884_All
Unigene39382_All
Unigene43234_All
Unigene43804_All
Unigene43906_All
Unigene47079_All
Unigene49682_All
Unigene49724_All
Unigene6456_All
Unigene6658_All
Unigene7440_All
Unigene8668_All
