# Supplementary material for: Identification of Functional Gene Modules Associated With STAT-Mediated Antiviral Responses to White Spot Syndrome Virus in Shrimp
Source: Front Physiol. 2019 Mar 11;10:212. doi: 10.3389/fphys.2019.00212 (PMC6421301; doi:10.3389/fphys.2019.00212)
Supplement: FILE S4 — Modules affected by both WSSV and STAT. [file Data_Sheet_4.ZIP › modules.affected.by.WSSV.and.STAT/fitDegGroup1_132.txt]

CL1512.Contig4_All
CL1735.Contig3_All
CL2903.Contig1_All
CL3165.Contig2_All
CL3237.Contig2_All
CL3534.Contig1_All
CL3851.Contig2_All
CL4116.Contig3_All
CL4229.Contig2_All
CL4508.Contig1_All
CL4614.Contig1_All
CL4641.Contig2_All
CL5095.Contig1_All
CL5372.Contig1_All
CL5559.Contig1_All
CL610.Contig4_All
Unigene10241_All
Unigene10860_All
Unigene11308_All
Unigene14419_All
Unigene18051_All
Unigene21809_All
Unigene25318_All
Unigene25799_All
Unigene29339_All
Unigene29461_All
Unigene31412_All
Unigene37292_All
Unigene39850_All
Unigene42660_All
Unigene45764_All
Unigene50053_All
Unigene669_All
