# Supplementary material for: Identification of Functional Gene Modules Associated With STAT-Mediated Antiviral Responses to White Spot Syndrome Virus in Shrimp
Source: Front Physiol. 2019 Mar 11;10:212. doi: 10.3389/fphys.2019.00212 (PMC6421301; doi:10.3389/fphys.2019.00212)
Supplement: FILE S4 — Modules affected by both WSSV and STAT. [file Data_Sheet_4.ZIP › modules.affected.by.WSSV.and.STAT/fitDegGroup1_136.txt]

CL1189.Contig5_All
CL138.Contig6_All
CL1467.Contig1_All
CL2202.Contig2_All
CL2386.Contig2_All
CL3153.Contig5_All
CL3750.Contig2_All
CL4851.Contig2_All
CL4975.Contig2_All
CL527.Contig5_All
CL5535.Contig2_All
CL5716.Contig2_All
CL909.Contig6_All
Unigene10761_All
Unigene1496_All
Unigene17630_All
Unigene18854_All
Unigene23291_All
Unigene26023_All
Unigene28701_All
Unigene29390_All
Unigene31541_All
Unigene37024_All
Unigene40656_All
Unigene43875_All
Unigene46051_All
Unigene47203_All
Unigene47497_All
Unigene47918_All
Unigene48661_All
Unigene7004_All
Unigene8260_All
