# Supplementary material for: Identification of Functional Gene Modules Associated With STAT-Mediated Antiviral Responses to White Spot Syndrome Virus in Shrimp
Source: Front Physiol. 2019 Mar 11;10:212. doi: 10.3389/fphys.2019.00212 (PMC6421301; doi:10.3389/fphys.2019.00212)
Supplement: FILE S4 — Modules affected by both WSSV and STAT. [file Data_Sheet_4.ZIP › modules.affected.by.WSSV.and.STAT/fitDegGroup1_140.txt]

CL1032.Contig1_All
CL1396.Contig1_All
CL1663.Contig6_All
CL17.Contig3_All
CL1756.Contig2_All
CL1791.Contig6_All
CL2533.Contig1_All
CL2685.Contig3_All
CL2751.Contig1_All
CL277.Contig4_All
CL2927.Contig3_All
CL315.Contig2_All
CL3224.Contig1_All
CL3322.Contig4_All
CL3611.Contig1_All
CL398.Contig24_All
CL4737.Contig4_All
CL4806.Contig1_All
CL50.Contig14_All
CL5172.Contig1_All
CL5203.Contig1_All
CL5498.Contig2_All
CL5600.Contig2_All
CL5841.Contig1_All
CL5970.Contig1_All
CL6178.Contig2_All
CL6205.Contig2_All
CL899.Contig2_All
CL946.Contig3_All
CL964.Contig3_All
CL988.Contig7_All
Unigene16735_All
Unigene21634_All
Unigene25507_All
Unigene30501_All
Unigene31083_All
Unigene33238_All
Unigene33765_All
Unigene33798_All
Unigene3657_All
Unigene38373_All
Unigene40534_All
Unigene41587_All
Unigene43428_All
Unigene45246_All
Unigene45525_All
Unigene45587_All
Unigene45872_All
Unigene45897_All
Unigene46452_All
Unigene47533_All
Unigene47730_All
Unigene47814_All
Unigene48382_All
Unigene6818_All
