# Supplementary material for: Identification of Functional Gene Modules Associated With STAT-Mediated Antiviral Responses to White Spot Syndrome Virus in Shrimp
Source: Front Physiol. 2019 Mar 11;10:212. doi: 10.3389/fphys.2019.00212 (PMC6421301; doi:10.3389/fphys.2019.00212)
Supplement: FILE S4 — Modules affected by both WSSV and STAT. [file Data_Sheet_4.ZIP › modules.affected.by.WSSV.and.STAT/fitDegGroup1_142.txt]

CL138.Contig8_All
CL1735.Contig1_All
CL1973.Contig1_All
CL2202.Contig2_All
CL254.Contig3_All
CL2588.Contig3_All
CL3481.Contig4_All
CL3573.Contig1_All
CL3919.Contig1_All
CL4002.Contig1_All
CL4786.Contig3_All
CL5281.Contig2_All
CL805.Contig1_All
Unigene12399_All
Unigene14059_All
Unigene14857_All
Unigene17337_All
Unigene17791_All
Unigene18290_All
Unigene20467_All
Unigene20769_All
Unigene21223_All
Unigene2304_All
Unigene24048_All
Unigene24166_All
Unigene25520_All
Unigene25846_All
Unigene28910_All
Unigene30719_All
Unigene3449_All
Unigene36407_All
Unigene39884_All
Unigene40385_All
Unigene46811_All
Unigene48856_All
Unigene4942_All
Unigene49800_All
