# Supplementary material for: Identification of Functional Gene Modules Associated With STAT-Mediated Antiviral Responses to White Spot Syndrome Virus in Shrimp
Source: Front Physiol. 2019 Mar 11;10:212. doi: 10.3389/fphys.2019.00212 (PMC6421301; doi:10.3389/fphys.2019.00212)
Supplement: FILE S4 — Modules affected by both WSSV and STAT. [file Data_Sheet_4.ZIP › modules.affected.by.WSSV.and.STAT/fitDegGroup1_143.txt]

CL1467.Contig4_All
CL1848.Contig5_All
CL2215.Contig1_All
CL2353.Contig1_All
CL33.Contig4_All
CL3481.Contig4_All
CL3532.Contig2_All
CL3763.Contig5_All
CL4709.Contig3_All
CL5163.Contig2_All
CL5648.Contig2_All
CL5932.Contig2_All
CL799.Contig2_All
CL802.Contig2_All
CL889.Contig3_All
CL988.Contig3_All
Unigene11054_All
Unigene12423_All
Unigene14281_All
Unigene1460_All
Unigene17750_All
Unigene18756_All
Unigene20447_All
Unigene22092_All
Unigene2408_All
Unigene25200_All
Unigene25409_All
Unigene25921_All
Unigene30807_All
Unigene32318_All
Unigene32621_All
Unigene33195_All
Unigene33306_All
Unigene38815_All
Unigene40335_All
Unigene44593_All
Unigene44994_All
Unigene45441_All
Unigene45953_All
Unigene46970_All
Unigene47722_All
Unigene48790_All
Unigene48988_All
Unigene6737_All
Unigene7062_All
Unigene7359_All
Unigene9850_All
