# Supplementary material for: Identification of Functional Gene Modules Associated With STAT-Mediated Antiviral Responses to White Spot Syndrome Virus in Shrimp
Source: Front Physiol. 2019 Mar 11;10:212. doi: 10.3389/fphys.2019.00212 (PMC6421301; doi:10.3389/fphys.2019.00212)
Supplement: FILE S4 — Modules affected by both WSSV and STAT. [file Data_Sheet_4.ZIP › modules.affected.by.WSSV.and.STAT/fitDegGroup1_149.txt]

CL113.Contig1_All
CL1324.Contig2_All
CL149.Contig12_All
CL1640.Contig3_All
CL1831.Contig1_All
CL2504.Contig6_All
CL2638.Contig2_All
CL3639.Contig2_All
CL3675.Contig2_All
CL3690.Contig2_All
CL37.Contig8_All
CL3879.Contig1_All
CL4575.Contig2_All
CL5259.Contig1_All
CL5733.Contig2_All
CL6046.Contig1_All
CL889.Contig3_All
CL988.Contig3_All
Unigene10281_All
Unigene12957_All
Unigene13672_All
Unigene1634_All
Unigene16732_All
Unigene1679_All
Unigene21852_All
Unigene23937_All
Unigene24200_All
Unigene2425_All
Unigene25175_All
Unigene2521_All
Unigene25713_All
Unigene29349_All
Unigene32209_All
Unigene34173_All
Unigene36754_All
Unigene41156_All
Unigene43430_All
Unigene45480_All
Unigene45644_All
Unigene47324_All
Unigene47645_All
Unigene48536_All
Unigene48603_All
Unigene48694_All
Unigene49487_All
Unigene49585_All
Unigene6584_All
Unigene6921_All
Unigene9358_All
