# Supplementary material for: Identification of Functional Gene Modules Associated With STAT-Mediated Antiviral Responses to White Spot Syndrome Virus in Shrimp
Source: Front Physiol. 2019 Mar 11;10:212. doi: 10.3389/fphys.2019.00212 (PMC6421301; doi:10.3389/fphys.2019.00212)
Supplement: FILE S4 — Modules affected by both WSSV and STAT. [file Data_Sheet_4.ZIP › modules.affected.by.WSSV.and.STAT/fitDegGroup1_150.txt]

CL1417.Contig1_All
CL1435.Contig2_All
CL1844.Contig4_All
CL1922.Contig3_All
CL2093.Contig3_All
CL3570.Contig1_All
CL5351.Contig1_All
CL571.Contig1_All
CL599.Contig1_All
Unigene12464_All
Unigene18051_All
Unigene24795_All
Unigene29098_All
Unigene30396_All
Unigene31303_All
Unigene3346_All
Unigene40098_All
Unigene43521_All
Unigene43995_All
Unigene45812_All
Unigene49447_All
Unigene5133_All
Unigene5466_All
Unigene6592_All
