# Supplementary material for: Identification of Functional Gene Modules Associated With STAT-Mediated Antiviral Responses to White Spot Syndrome Virus in Shrimp
Source: Front Physiol. 2019 Mar 11;10:212. doi: 10.3389/fphys.2019.00212 (PMC6421301; doi:10.3389/fphys.2019.00212)
Supplement: FILE S4 — Modules affected by both WSSV and STAT. [file Data_Sheet_4.ZIP › modules.affected.by.WSSV.and.STAT/fitDegGroup1_153.txt]

CL1020.Contig1_All
CL1181.Contig4_All
CL157.Contig1_All
CL1588.Contig1_All
CL2139.Contig7_All
CL3290.Contig1_All
CL3451.Contig2_All
CL4140.Contig2_All
CL4585.Contig1_All
CL46.Contig2_All
CL6118.Contig2_All
CL857.Contig3_All
Unigene10233_All
Unigene11470_All
Unigene15976_All
Unigene20179_All
Unigene20397_All
Unigene21267_All
Unigene21434_All
Unigene2419_All
Unigene28621_All
Unigene36037_All
Unigene41263_All
Unigene43771_All
Unigene45598_All
Unigene45716_All
Unigene46875_All
Unigene9302_All
