# Supplementary material for: Identification of Functional Gene Modules Associated With STAT-Mediated Antiviral Responses to White Spot Syndrome Virus in Shrimp
Source: Front Physiol. 2019 Mar 11;10:212. doi: 10.3389/fphys.2019.00212 (PMC6421301; doi:10.3389/fphys.2019.00212)
Supplement: FILE S4 — Modules affected by both WSSV and STAT. [file Data_Sheet_4.ZIP › modules.affected.by.WSSV.and.STAT/fitDegGroup1_162.txt]

CL1032.Contig1_All
CL2052.Contig6_All
CL2666.Contig3_All
CL2927.Contig3_All
CL3015.Contig2_All
CL315.Contig2_All
CL3283.Contig2_All
CL3322.Contig4_All
CL3611.Contig1_All
CL37.Contig17_All
CL398.Contig24_All
CL4515.Contig2_All
CL4708.Contig1_All
CL4737.Contig4_All
CL4789.Contig2_All
CL4806.Contig1_All
CL4933.Contig2_All
CL4988.Contig2_All
CL5023.Contig1_All
CL5169.Contig1_All
CL5278.Contig1_All
CL580.Contig5_All
CL59.Contig3_All
CL6098.Contig1_All
CL6205.Contig2_All
CL946.Contig3_All
CL998.Contig1_All
Unigene10705_All
Unigene12092_All
Unigene14105_All
Unigene16641_All
Unigene19202_All
Unigene21634_All
Unigene22266_All
Unigene25507_All
Unigene31083_All
Unigene33238_All
Unigene35708_All
Unigene36771_All
Unigene38169_All
Unigene40534_All
Unigene40839_All
Unigene40975_All
Unigene41587_All
Unigene42298_All
Unigene43428_All
Unigene44393_All
Unigene45167_All
Unigene45197_All
Unigene45269_All
Unigene45897_All
Unigene46452_All
Unigene47730_All
Unigene47814_All
Unigene48382_All
Unigene6622_All
Unigene6681_All
Unigene6751_All
Unigene7443_All
