# Supplementary material for: Identification of Functional Gene Modules Associated With STAT-Mediated Antiviral Responses to White Spot Syndrome Virus in Shrimp
Source: Front Physiol. 2019 Mar 11;10:212. doi: 10.3389/fphys.2019.00212 (PMC6421301; doi:10.3389/fphys.2019.00212)
Supplement: FILE S4 — Modules affected by both WSSV and STAT. [file Data_Sheet_4.ZIP › modules.affected.by.WSSV.and.STAT/fitDegGroup1_169.txt]

CL1126.Contig13_All
CL1531.Contig2_All
CL1735.Contig3_All
CL1867.Contig5_All
CL2388.Contig2_All
CL2578.Contig2_All
CL3165.Contig2_All
CL3237.Contig2_All
CL3534.Contig1_All
CL3851.Contig2_All
CL4229.Contig2_All
CL5372.Contig1_All
CL6071.Contig1_All
CL877.Contig3_All
Unigene10241_All
Unigene14278_All
Unigene14419_All
Unigene16374_All
Unigene21809_All
Unigene24664_All
Unigene2652_All
Unigene27326_All
Unigene28417_All
Unigene29157_All
Unigene29339_All
Unigene3087_All
Unigene35832_All
Unigene40571_All
Unigene41683_All
Unigene45348_All
Unigene45369_All
Unigene46115_All
Unigene47171_All
