# Supplementary material for: Identification of Functional Gene Modules Associated With STAT-Mediated Antiviral Responses to White Spot Syndrome Virus in Shrimp
Source: Front Physiol. 2019 Mar 11;10:212. doi: 10.3389/fphys.2019.00212 (PMC6421301; doi:10.3389/fphys.2019.00212)
Supplement: FILE S4 — Modules affected by both WSSV and STAT. [file Data_Sheet_4.ZIP › modules.affected.by.WSSV.and.STAT/fitDegGroup1_174.txt]

CL1399.Contig2_All
CL1512.Contig2_All
CL2264.Contig4_All
CL2293.Contig2_All
CL2963.Contig1_All
CL3075.Contig2_All
CL3399.Contig2_All
CL6160.Contig2_All
CL886.Contig2_All
Unigene10947_All
Unigene14580_All
Unigene16836_All
Unigene17390_All
Unigene19899_All
Unigene24120_All
Unigene24213_All
Unigene29470_All
Unigene32647_All
Unigene38620_All
Unigene40985_All
Unigene46185_All
Unigene47482_All
Unigene48239_All
Unigene6613_All
