# Supplementary material for: Identification of Functional Gene Modules Associated With STAT-Mediated Antiviral Responses to White Spot Syndrome Virus in Shrimp
Source: Front Physiol. 2019 Mar 11;10:212. doi: 10.3389/fphys.2019.00212 (PMC6421301; doi:10.3389/fphys.2019.00212)
Supplement: FILE S4 — Modules affected by both WSSV and STAT. [file Data_Sheet_4.ZIP › modules.affected.by.WSSV.and.STAT/fitDegGroup1_185.txt]

CL207.Contig28_All
CL2078.Contig2_All
CL250.Contig2_All
CL2761.Contig3_All
CL3130.Contig3_All
CL3852.Contig1_All
CL4197.Contig1_All
CL4317.Contig1_All
CL440.Contig3_All
CL4687.Contig1_All
CL5254.Contig2_All
CL5283.Contig1_All
CL6205.Contig1_All
CL765.Contig5_All
CL900.Contig2_All
Unigene12288_All
Unigene21097_All
Unigene21898_All
Unigene23841_All
Unigene25361_All
Unigene25752_All
Unigene26166_All
Unigene28991_All
Unigene29293_All
Unigene32281_All
Unigene33407_All
Unigene36211_All
Unigene36462_All
Unigene38631_All
Unigene43069_All
Unigene43906_All
Unigene47079_All
Unigene5515_All
Unigene6341_All
Unigene6802_All
Unigene6847_All
Unigene9225_All
