# Supplementary material for: Identification of Functional Gene Modules Associated With STAT-Mediated Antiviral Responses to White Spot Syndrome Virus in Shrimp
Source: Front Physiol. 2019 Mar 11;10:212. doi: 10.3389/fphys.2019.00212 (PMC6421301; doi:10.3389/fphys.2019.00212)
Supplement: FILE S4 — Modules affected by both WSSV and STAT. [file Data_Sheet_4.ZIP › modules.affected.by.WSSV.and.STAT/fitDegGroup1_190.txt]

CL1512.Contig3_All
CL1512.Contig6_All
CL1834.Contig1_All
CL2036.Contig1_All
CL23.Contig8_All
CL2528.Contig1_All
CL2927.Contig3_All
CL3224.Contig1_All
CL3275.Contig1_All
CL3468.Contig1_All
CL3611.Contig1_All
CL3852.Contig1_All
CL4370.Contig1_All
CL440.Contig3_All
CL4737.Contig4_All
CL5096.Contig2_All
CL5189.Contig2_All
CL5602.Contig2_All
CL654.Contig7_All
CL831.Contig1_All
Unigene17342_All
Unigene17394_All
Unigene18174_All
Unigene21136_All
Unigene2175_All
Unigene21898_All
Unigene29396_All
Unigene30720_All
Unigene35286_All
Unigene39221_All
Unigene39851_All
Unigene40352_All
Unigene43234_All
Unigene44676_All
Unigene47814_All
Unigene49682_All
Unigene8795_All
