# Supplementary material for: Identification of Functional Gene Modules Associated With STAT-Mediated Antiviral Responses to White Spot Syndrome Virus in Shrimp
Source: Front Physiol. 2019 Mar 11;10:212. doi: 10.3389/fphys.2019.00212 (PMC6421301; doi:10.3389/fphys.2019.00212)
Supplement: FILE S4 — Modules affected by both WSSV and STAT. [file Data_Sheet_4.ZIP › modules.affected.by.WSSV.and.STAT/fitDegGroup1_191.txt]

CL1415.Contig2_All
CL1584.Contig10_All
CL1779.Contig2_All
CL2006.Contig3_All
CL2163.Contig2_All
CL2388.Contig2_All
CL2897.Contig1_All
CL4308.Contig3_All
CL4704.Contig2_All
CL5175.Contig2_All
CL5940.Contig2_All
CL6212.Contig1_All
CL6335.Contig2_All
CL929.Contig6_All
Unigene13031_All
Unigene24582_All
Unigene27812_All
Unigene28280_All
Unigene28514_All
Unigene41683_All
Unigene45598_All
