# Supplementary material for: Identification of Functional Gene Modules Associated With STAT-Mediated Antiviral Responses to White Spot Syndrome Virus in Shrimp
Source: Front Physiol. 2019 Mar 11;10:212. doi: 10.3389/fphys.2019.00212 (PMC6421301; doi:10.3389/fphys.2019.00212)
Supplement: FILE S4 — Modules affected by both WSSV and STAT. [file Data_Sheet_4.ZIP › modules.affected.by.WSSV.and.STAT/fitDegGroup1_195.txt]

CL1307.Contig2_All
CL1972.Contig4_All
CL3363.Contig2_All
CL421.Contig2_All
CL4217.Contig2_All
CL45.Contig1_All
CL5250.Contig4_All
CL5629.Contig1_All
CL72.Contig4_All
Unigene11319_All
Unigene14466_All
Unigene14895_All
Unigene17650_All
Unigene17724_All
Unigene17853_All
Unigene18091_All
Unigene1870_All
Unigene21776_All
Unigene21918_All
Unigene2264_All
Unigene25566_All
Unigene25768_All
Unigene25862_All
Unigene27382_All
Unigene27684_All
Unigene28060_All
Unigene29171_All
Unigene31358_All
Unigene31712_All
Unigene32180_All
Unigene3334_All
Unigene37022_All
Unigene37234_All
Unigene40594_All
Unigene43212_All
Unigene48903_All
Unigene49467_All
