# Supplementary material for: Identification of Functional Gene Modules Associated With STAT-Mediated Antiviral Responses to White Spot Syndrome Virus in Shrimp
Source: Front Physiol. 2019 Mar 11;10:212. doi: 10.3389/fphys.2019.00212 (PMC6421301; doi:10.3389/fphys.2019.00212)
Supplement: FILE S4 — Modules affected by both WSSV and STAT. [file Data_Sheet_4.ZIP › modules.affected.by.WSSV.and.STAT/fitDegGroup1_196.txt]

CL105.Contig2_All
CL1538.Contig1_All
CL1955.Contig2_All
CL2424.Contig1_All
CL2449.Contig6_All
CL2859.Contig2_All
CL2895.Contig1_All
CL3453.Contig2_All
CL384.Contig4_All
CL5786.Contig3_All
CL6002.Contig2_All
CL799.Contig2_All
CL86.Contig5_All
CL945.Contig3_All
Unigene10722_All
Unigene10726_All
Unigene1411_All
Unigene1500_All
Unigene18786_All
Unigene18993_All
Unigene18994_All
Unigene18995_All
Unigene19961_All
Unigene20540_All
Unigene25200_All
Unigene25816_All
Unigene26202_All
Unigene30814_All
Unigene31432_All
Unigene32621_All
Unigene32681_All
Unigene33726_All
Unigene3388_All
Unigene36190_All
Unigene36289_All
Unigene36818_All
Unigene37826_All
Unigene38337_All
Unigene39399_All
Unigene41156_All
Unigene42866_All
Unigene43430_All
Unigene43753_All
Unigene47641_All
Unigene49057_All
Unigene5318_All
Unigene5385_All
Unigene6663_All
Unigene9789_All
Unigene9838_All
